# Supplementary material
Source: ML conference proceedings conference paper supplement (https://openreview.net/forum?id=aIUnoHuENG)
Supplement: supplementary_material [file attachment]

---

# Feature Adaptation for Sparse Linear Regression

---

Anonymous Author(s)

Affiliation

Address

email

## Abstract

Sparse linear regression is a central problem in high-dimensional statistics. We study the correlated random design setting, where the covariates are drawn from a multivariate Gaussian  $N(0, \Sigma)$ , and we seek an estimator with small excess risk.

If the true signal is  $t$ -sparse, information-theoretically, it is possible to achieve strong recovery guarantees with only  $O(t \log n)$  samples. However, computationally efficient algorithms have sample complexity linear in (some variant of) the *condition number* of  $\Sigma$ . Classical algorithms such as the Lasso can require significantly more samples than necessary even if there is only a single sparse approximate dependency among the covariates.

We provide a polynomial-time algorithm that, given  $\Sigma$ , automatically adapts the Lasso to tolerate a small number of approximate dependencies. In particular, we achieve near-optimal sample complexity for constant sparsity and if  $\Sigma$  has few “outlier” eigenvalues. Our algorithm fits into a broader framework of *feature adaptation* for sparse linear regression with ill-conditioned covariates. With this framework, we additionally provide the first polynomial-factor improvement over brute-force search for constant sparsity  $t$  and arbitrary covariance  $\Sigma$ .

## 1 Introduction

Sparse linear regression is a fundamental problem in high-dimensional statistics. In a natural random design formulation of this problem, we are given  $m$  independent and identically distributed samples  $(X_i, y_i)_{i=1}^m$  where each sample’s covariates are drawn from an  $n$ -dimensional Gaussian random vector  $X_i \sim N(0, \Sigma)$ , and each response is  $y_i = \langle X_i, v^* \rangle + \xi_i$  for independent noise  $\xi_i \sim N(0, \sigma^2)$  and a  $t$ -sparse ground truth regressor  $v^* \in \mathbb{R}^n$ , where  $t$  is much smaller than  $n$ . The goal<sup>1</sup> is to output a vector  $\hat{v} \in \mathbb{R}^n$  for which the *excess risk*

$$\mathbb{E}(\langle X_0, \hat{v} \rangle - y_0)^2 - \sigma^2 = (\hat{v} - v^*)^\top \Sigma (\hat{v} - v^*) =: \|\hat{v} - v^*\|_\Sigma^2$$

is as small as possible, where  $(X_0, y_0)$  is an independent sample from the same model.

Without the sparsity assumption, the number of samples needed to achieve small excess risk (say,  $O(\sigma^2)$ ) is linear in the dimension; with  $O(n)$  samples, simple and computationally efficient algorithms such as ordinary least squares achieve the statistically optimal excess risk  $O\left(\frac{\sigma^2 n}{m}\right)$ . Sparsity allows for a significant statistical improvement: ignoring computational efficiency, it is well known that there is an estimator  $\hat{v}$  with excess risk  $O\left(\frac{\sigma^2 t \log n}{m}\right)$  as long as  $m = \Omega(t \log n)$  (see e.g. [13, 33]; Theorem 4.1 in [23]).

---

<sup>1</sup>More generally, from a learning theory perspective, we could consider an arbitrary improper learner outputting a function  $\hat{f}(X_0)$ , rather than specifically learning a linear function  $\langle X_0, \hat{v} \rangle$ . At least when  $\Sigma$  is known, there is no advantage as we can always project  $\hat{f}$  onto the space of linear functions.

31 The catch is that computing this estimator involves a brute-force search over  $\binom{n}{t}$  possibilities (i.e.,  
 32 the possible supports for  $v^*$ ). At first glance, this combinatorial search may seem unavoidable if  
 33 we wish to take advantage of sparsity. Indeed, similar problems are notoriously difficult: the only  
 34 non-trivial algorithms for e.g., learning  $t$ -sparse parities with noise still require  $n^{\Omega(t)}$  time [29, 37].  
 35 However, it is a celebrated fact that for sparse linear regression, computationally efficient methods  
 36 such as Lasso and Orthogonal Matching Pursuit can avoid this combinatorial search and still achieve  
 37 very strong theoretical guarantees under conditions such as the Restricted Isometry Property (see e.g.  
 38 [7, 10, 5, 4, 3, 1]). In the random design setting we consider, the Lasso is known to achieve optimal  
 39 statistical rates (up to constants) when the covariance matrix  $\Sigma$  is *well-conditioned* [32, 46].

40 What about when  $\Sigma$  is ill-conditioned? In contrast with the statistically optimal estimator, Lasso and  
 41 its cousins provably *require* sample complexity scaling with (some variant of) the condition number  
 42 of  $\Sigma$  (see e.g. Theorem 14 in [38] or Theorem 6.5 in [23]). And with a few exceptions (e.g., in some  
 43 settings with special graphical structure [23]) there has been little progress on designing new efficient  
 44 algorithms for sparse linear regression with ill-conditioned  $\Sigma$  (see Section 4 for further discussion).  
 45 For a general covariance  $\Sigma$ , no algorithm is even known that can achieve sample complexity  $f(t) \cdot$   
 46  $n^{1-\epsilon}$  (for an arbitrary function  $f$ ) without brute-force search.

47 A computationally efficient algorithm that approaches the optimal statistical rate for *arbitrary*  $\Sigma$   
 48 might be too much to hope for. While no computational lower bounds are known, even in restricted  
 49 computational models such as the Statistical Query model,<sup>2</sup> the related *worst-case* problem of find-  
 50 ing a  $t$ -sparse solution to a system of linear equations requires  $n^{\Omega(t)}$  time under standard complexity  
 51 assumptions [15]. So it is plausible, though not certain, that some assumptions on  $\Sigma$  are neces-  
 52 sary. In this work – inspired by a long tradition (in random matrix theory, statistics, graph theory,  
 53 and other areas) of studying matrices with a spectrum that is split between a large “bulk” and a  
 54 small number of outlier “spike” eigenvalues [28, 39, 43] – we identify a broad generalization of the  
 55 standard well-conditionedness assumption, under which brute-force search can still be avoided.

## 56 1.1 Beyond well-conditioned $\Sigma$

57 Say that  $\Sigma$  has eigenvalues  $\lambda_1 \leq \dots \leq \lambda_n$ , and that the sparsity  $t$  is a constant.<sup>3</sup> Then standard  
 58 bounds for Lasso require sample complexity  $(\lambda_n/\lambda_1) \cdot O(\log n)$ . But if the covariates contain even  
 59 a single approximate linear dependency, then  $\lambda_n/\lambda_1$  may be arbitrarily large. Moreover, if the  
 60 dependency is sparse (e.g. two covariates are highly correlated), then there is a natural choice of  
 61  $v^*$  for which Lasso provably fails (see Theorem 6.5 of [23]). Indeed, this phenomenon is not just  
 62 a limitation of the analysis; Lasso fails empirically as well, even for very small  $t$  (see Figure 2 in  
 63 Appendix H for a simple example with  $t = 3$ ).

64 Such dependencies arise in applications ranging from finance (e.g., where some pairs of stocks or  
 65 ETFs may be highly correlated, and an investor may be interested in the differences) to genomic  
 66 data (where functionally related genes may have highly correlated expression patterns). Two-sparse  
 67 dependencies can be directly identified by looking at the covariance matrix; see Section 4 for some  
 68 discussion of previous research in this direction. But as  $t$  increases, naive methods for identifying  $t$ -  
 69 sparse dependencies quickly become computationally intractable. With domain knowledge, it may  
 70 be possible to manually identify and correct such dependencies, but this process would also be  
 71 time-consuming. Thus, we ask the following question: instead of assuming that  $\lambda_n/\lambda_1$  is bounded,  
 72 suppose that there are constants  $d_\ell$  and  $d_h$  so that  $\lambda_{n-d_h}/\lambda_{d_\ell+1}$  is bounded, i.e. the spectrum of  
 73  $\Sigma$  has only  $d_\ell$  outliers at the low end, and only  $d_h$  outliers at the high end. Can we still design an  
 74 algorithm that achieves sample complexity  $O(\log n)$  without resorting to brute-force search?

75 **Main result.** We give a positive answer: an algorithm for sparse linear regression that is both  
 76 computationally and statistically efficient for covariance matrices with a small number of “outlier”  
 77 eigenvalues. In particular, this means we can handle a few approximate dependencies among the  
 78 covariates (quantified by the number of eigenvalues below a threshold). In comparison, Lasso and  
 79 other classical algorithms cannot tolerate even a single sparse approximate dependency. Our main  
 80 algorithmic result is the following:

<sup>2</sup>There are lower bounds for a family of regression estimators with coordinate-separable regularization [44]  
 and a family of “preconditioned-Lasso” estimators [23, 24].

<sup>3</sup>Note that for moderate-sized datasets (e.g.  $n = 1000$ ), brute-force search is infeasible even for  $t$  as small  
 as four or five.

**Theorem 1.1.** Let  $n, t, d_\ell, d_h, L \in \mathbb{N}$  and  $\sigma, \delta > 0$ . Let  $\Sigma \in \mathbb{R}^{n \times n}$  be a positive semi-definite matrix with (non-negative) eigenvalues  $\lambda_1 \leq \dots \leq \lambda_n$ . Let  $v^* \in \mathbb{R}^n$  be any  $t$ -sparse vector. Let  $(X_i, y_i)_{i=1}^m$  be independent with  $X_i \sim N(0, \Sigma)$  and  $y_i = \langle X_i, v^* \rangle + \xi_i$ , where  $\xi_i \sim N(0, \sigma^2)$ .

Let  $n_{\text{eff}} := t(\lambda_{n-d_h}/\lambda_{d_\ell+1}) \log(nL/\delta) + t^{O(t)}d_\ell + d_h$ . Given  $\Sigma, t, d_\ell, \delta$ , and  $(X_i, y_i)_{i=1}^m$ , there is an estimator  $\hat{v} \in \mathbb{R}^n$  that has excess risk

$$\|\hat{v} - v^*\|_\Sigma^2 \leq O\left(\frac{\sigma^2 n_{\text{eff}} L}{m}\right) + 2^{-L} \cdot \|v^*\|_\Sigma^2$$

with probability at least  $1 - \delta$ , so long as  $m \geq \Omega(n_{\text{eff}} L)$ . Moreover,  $\hat{v}$  can be computed in time  $\text{poly}(n)$ .

Specifically, taking  $L \sim \log(m \|v^*\|_\Sigma^2 / \sigma^2)$ , the time complexity is dominated by  $L$  eigendecompositions and  $L$  calls to a Lasso program, for overall runtime  $\tilde{O}(n^3)$  (see Algorithm 2). This is substantially faster than the brute-force method (which takes  $O(n^t)$  time) even for small values of  $t$ .

The excess risk decays at rate  $\tilde{O}(\sigma^2 n_{\text{eff}} / m)$  (hiding the logarithmic factor), which is near the statistically optimal rate of  $\tilde{O}(\sigma^2 t / m)$  so long as  $n_{\text{eff}}$  is small, i.e.  $t$  is small and only a few eigenvalues lie outside a constant-factor range. In our analysis, we prove that the standard Lasso estimator can already tolerate a few *large* eigenvalues — the main algorithmic innovation is needed to tolerate a few *small* eigenvalues, which turns out to be much trickier. Notice that when  $d_\ell = d_h = 0$  we recover standard Lasso guarantees up to the factor of  $L$ ; thus, Theorem 1.1 morally represents a generalization of classical results.

We also show how to achieve a different trade-off between time and samples, eliminating the dependence on  $d_\ell$  in sample complexity at the cost of larger runtime:

**Theorem 1.2.** In the setting of Theorem 1.1, let  $n'_{\text{eff}} := t(\lambda_{n-d_h}/\lambda_{d_\ell+1}) \log(nL/\delta) + t^2 \log(t) + d_h$ . Given  $\Sigma, t, d_\ell, \delta$ , and  $(X_i, y_i)_{i=1}^m$ , there is an estimator  $\hat{v} \in \mathbb{R}^n$  that has excess risk

$$\|\hat{v} - v^*\|_\Sigma^2 \leq O\left(\frac{\sigma^2 n'_{\text{eff}} L}{m}\right) + 2^{-L} \cdot \|v^*\|_\Sigma^2$$

with probability at least  $1 - \delta$ , so long as  $m \geq \Omega(n'_{\text{eff}} L)$ . Moreover,  $\hat{v}$  can be computed in time  $\text{poly}(n, m, d_\ell^t, t^2)$ .

**Discussion & limitations.** We discuss two limitations of the above results. First, both results incur exponential dependence on the sparsity  $t$  (in the sample complexity for Theorem 1.1, and the runtime for Theorem 1.2), which may be suboptimal. For Theorem 1.1, we remark that in practice the algorithm may not suffer this dependence (see e.g. Figure 1), and it is possible that the analysis can be tightened. For Theorem 1.2, we emphasize that the runtime is still fundamentally different than brute-force search: in particular, it's *fixed-parameter tractable* in  $t$  and  $d_\ell$ .

Second, both results require that  $\Sigma$  is known. Thus, they are only applicable in settings where we either have a priori knowledge, or can estimate  $\Sigma$  accurately because a large amount of unlabelled data is available. At a high level, this limitation is due to the need to compute the eigendecomposition of  $\Sigma$ , which cannot be approximated from the empirical covariance of a small number of samples.

For simplicity, we have stated our results in terms of Gaussian covariates and noise, but this is not a fundamental limitation. We expect it is possible to prove similar results in the sub-Gaussian case at the cost of making the proof longer — for instance, by building upon the techniques from [25] and related works.

**Pseudocode & simulation.** See Algorithm 1 for complete pseudocode of `AdaptedBP()`, a simplification of the method for the noiseless setting  $\sigma = 0$ . In Figure 1 we show that `AdaptedBP()` significantly outperforms standard Basis Pursuit (i.e. Lasso for noiseless data [7]) on a simple example with  $n = 1000$  variables,  $d_\ell = 10$  sparse approximate dependencies, and a ground truth regressor with sparsity  $t = 13$ . The covariates  $X_{1:1000}$  are all independent  $N(0, 1)$  except for 10 disjoint triplets  $\{(X_i, X_{i+1}, X_{i+2}) : i = 1, 4, \dots, 28\}$ , each of which has joint distribution

$$X_i := Z_i; \quad X_{i+1} = Z_i + 0.4Z_{i+1}; \quad X_{i+2} = Z_{i+1} + 0.4Z_{i+2}$$

where  $Z_i, Z_{i+1}, Z_{i+2} \sim N(0, 1)$  are independent. The (noiseless) responses are  $y = 6.25(X_1 - X_2) + 2.5X_3 + \frac{1}{\sqrt{10}} \sum_{i=991}^{1000} X_i$ . See Appendix I for implementation details.

---

**Algorithm 1:** Adapted BP for sparse linear regression with few outlier eigenvalues

---

```

Procedure FindHeavyCoordinates( $\{v_1, \dots, v_k\}, \alpha$ )
    /* GRAM-SCHMIDT computes an orthonormalization of  $v_1, \dots, v_k$  */
     $a_1, \dots, a_k \leftarrow \text{GRAM-SCHMIDT}(\{v_1, \dots, v_k\})$ 
    return  $\{i \in [n] : \sum_{j=1}^k ((a_j)_i)^2 \geq \alpha^2\}$ 

Procedure IterativePeeling( $\Sigma, d, t$ )
    Compute eigendecomposition  $\Sigma = \sum_{i=1}^n \lambda_i u_i u_i^\top$ 
     $P \leftarrow \sum_{i=d+1}^n u_i u_i^\top$ 
     $K_t \leftarrow \{i \in [n] : P_{ii} < 1 - 1/(9t^2)\}$ 
    for  $j = t$  to 1 do
         $\mathcal{I}_P(K_j) \leftarrow \text{FindHeavyCoordinates}(\{P_i : i \in K_j\}, 1/(6t))$ 
         $K_{j-1} \leftarrow K_j \cup \mathcal{I}_P(K_j)$ 
    return  $K_0$ 

Procedure AdaptedBP( $\Sigma, d, t, (X_i, y_i)_{i=1}^m$ )
     $S \leftarrow \text{IterativePeeling}(\Sigma, d, t)$ 
    return  $\hat{v} \in \operatorname{argmin}_{v \in \mathbb{R}^n : \mathbb{X}v = y} \sum_{i \notin S} |v_i|$ 

```

---

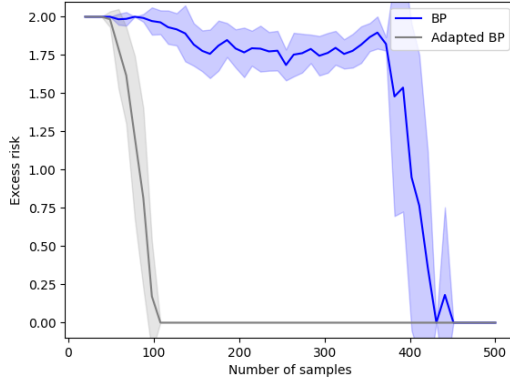

Figure 1: Basis Pursuit (BP) versus Adapted BP in a simple synthetic example with  $n = 1000$  covariates. The  $x$ -axis is the number of samples. The  $y$ -axis is the out-of-sample prediction error (averaged over 10 independent runs, and error bars indicate the standard deviation).

## 1.2 Organization

In Section 2 we give an overview of the proofs of Theorem 1.1 and 1.2 (the complete proofs and full algorithm pseudocode are given in Appendix C). In Section 3 we discuss our other results obtained via feature adaptation. Section 4 covers related work.

## 2 Proof techniques

We obtain Theorems 1.1 and 1.2 as outcomes of a flexible algorithmic approach for tackling sparse linear regression with ill-conditioned covariates: *feature adaptation*. As a pre-processing step, adapt or augment the covariates with additional features (i.e. well-chosen linear combinations of the covariates). Then, to predict the responses, apply  $\ell_1$ -regularized regression (Lasso) over the new set of features rather than the original covariates. In other words, we algorithmically change the *dictionary* (set of features) used in the Lasso regression. See Section 4 for a comparison to past approaches.

We start by explaining the goals of feature adaptation for general  $\Sigma$ , and then show how we achieve those desiderata when  $\Sigma$  has few outlier eigenvalues. More precisely, the main technical difficulty is in dealing with the small eigenvalues, so in this proof overview we focus on the case where the only outliers are small eigenvalues. Complete proofs of Theorems 1.1 and 1.2 are in Appendix C.

## 2.1 What makes a good dictionary: the view from weak learning

Obviously, the feature adaptation approach generalizes Lasso. Surprisingly, even though the sample complexity of the standard Lasso estimator is thoroughly understood, the basic question of whether for *every* covariate distribution (i.e. every  $\Sigma$ ) there *exists* a good dictionary remains wide-open. To crystallize the power of feature adaptation, we introduce the following notion of a “good” dictionary. We suggest considering the simplified setting of  $\alpha$ -weak learning, where the goal is just to find some  $\hat{v}$  so that the predictions  $\langle X, \hat{v} \rangle$  are  $\alpha$ -correlated with the ground truth  $\langle X, v^* \rangle$  when  $X \sim N(0, \Sigma)$ . Moreover, we focus first on the existential question (rather than the algorithmic question of finding the dictionary). We will return to the setting of Theorems 1.1 and 1.2 later. For now, in the weak learning setting, a good dictionary (when the covariate distribution is  $N(0, \Sigma)$ ) is one that satisfies the following covering property, but is not too large:

**Definition 2.1.** Let  $\Sigma \in \mathbb{R}^{n \times n}$  be a positive semi-definite matrix and let  $t, \alpha > 0$ . A set  $\{D_1, \dots, D_N\} \subseteq \mathbb{R}^n$  is a  $(t, \alpha)$ -dictionary for  $\Sigma$  if for every  $t$ -sparse  $v \in \mathbb{R}^n$ , there is some  $i \in [N]$  with

$$|\langle v, D_i \rangle_\Sigma| \geq \alpha \|v\|_\Sigma \|D_i\|_\Sigma,$$

where we define  $\langle x, y \rangle_\Sigma := x^\top \Sigma y$  and  $\|x\|_\Sigma^2 := x^\top \Sigma x$  for any  $x, y \in \mathbb{R}^n$ . Let  $\mathcal{N}_{t, \alpha}(\Sigma)$  be the size of the smallest  $(t, \alpha)$ -dictionary.

The relevance of the covering number  $\mathcal{N}_{t, \alpha}(\Sigma)$  is quite simple: given a  $(t, \alpha)$ -dictionary  $\mathcal{D}$  for  $\Sigma$ , and given samples  $(X_i, y_i)_{i=1}^m$ , the weak learning algorithm can simply output the vector  $\hat{v} \in \mathcal{D}$  that maximizes the empirical correlation between the predictions  $\langle X_i, \hat{v} \rangle$  and the responses  $y_i$ . So long as there are enough samples for empirical correlations to concentrate, Definition 2.1 guarantees success. Formally, allowing for preprocessing time to compute the dictionary,  $O(\alpha)$ -weak learning is possible in time  $\mathcal{N}_{t, \alpha}(\Sigma) \cdot \text{poly}(n)$ , with  $O(\alpha^{-2} \log \mathcal{N}_{t, \alpha}(\Sigma))$  samples (Proposition A.5).

Hypothetically, bounding  $\mathcal{N}_{t, \alpha}(\Sigma)$  may not be *necessary* to develop an efficient sparse linear regression algorithm. However, all assumptions on  $\Sigma$  that are currently known to enable efficient sparse linear regression also immediately imply bounds on  $\mathcal{N}_{t, \alpha}$  (see Appendix G). For example, when  $\Sigma$  is well-conditioned, the standard basis is a good dictionary of size  $n$  (Fact A.4).

In contrast, the only known bounds for arbitrary  $\Sigma$  (until the present work) are  $\mathcal{N}_{t, 1/\sqrt{t}}(\Sigma) \leq t \cdot \binom{n}{t}$  (the brute-force dictionary, which includes a  $\Sigma$ -orthonormal basis for every set of  $t$  covariates) and  $\mathcal{N}_{t, 1/\sqrt{n}}(\Sigma) \leq n$  (a  $\Sigma$ -orthonormal basis for all  $n$  covariates, which doesn’t take advantage of sparsity and corresponds to algorithms such as Ordinary Least Squares). Thus, the following basic question – when can we improve upon these trivial bounds – seems central to understanding when brute-force search can be avoided in sparse linear regression:

**Question 2.2.** How large is  $\mathcal{N}_{t, \alpha}(\Sigma)$  for an arbitrary positive semi-definite  $\Sigma \in \mathbb{R}^{n \times n}$ ? Are there natural families of ill-conditioned  $\Sigma$  (and functions  $f, g$ ) for which  $\mathcal{N}_{t, 1/f(t)}(\Sigma) \leq g(t) \cdot \text{poly}(n)$ ?

## 2.2 Constructing a good dictionary when $\Sigma$ has few small eigenvalues

We now address Question 2.2 in the setting where  $\Sigma$  has a small number of eigenvalues that are much smaller than  $\lambda_n$ . In this setting, the standard basis may not be a good dictionary. For example, if two covariates are highly correlated, their difference may not be correlated with any of them. Nonetheless, we can prove the following covering number bound:

**Theorem 2.3.** Let  $n, t, d \in \mathbb{N}$ . Let  $\Sigma \in \mathbb{R}^{n \times n}$  be a positive semi-definite matrix with eigenvalues  $\lambda_1 \leq \dots \leq \lambda_n$ . Then  $\mathcal{N}_{t, \alpha}(\Sigma) \leq t(7t)^{2t^2+t} d^t + n$ , where  $\alpha = \frac{1}{7\sqrt{t}} \sqrt{\lambda_{d+1}/\lambda_n}$ .

In particular, when  $t = O(1)$  and  $\Sigma$  is well-conditioned except for  $O(1)$  outliers  $\lambda_1, \dots, \lambda_d$ , we get a linear-size dictionary just as in the case where  $\Sigma$  is well-conditioned. In fact, the desired  $(t, \alpha)$ -dictionary can be constructed efficiently. Our key lemma shows that when  $\Sigma$  has few small eigenvalues, there is a small subset of covariates that “causes” all of the sparse approximate dependencies – in the sense that the  $\ell_2$  norm of any sparse vector, *excluding* the mass on the subset, can be upper bounded in terms of the  $\Sigma$ -norm of the vector. Moreover, there is an efficient algorithm that finds a superset of these covariates. Formally, we prove the following:

**Lemma 2.4.** Let  $n, t, d \in \mathbb{N}$ . Let  $\Sigma \in \mathbb{R}^{n \times n}$  be a positive semi-definite matrix with eigenvalues  $\lambda_1 \leq \dots \leq \lambda_n$ . Given  $\Sigma$ ,  $d$ , and  $t$ , there is a polynomial-time algorithm `IterativePeeling()` producing a set  $S \subseteq [n]$  with the following guarantees:

192 (a) For every  $t$ -sparse  $v \in \mathbb{R}^n$ , it holds that  $\|v_{[n] \setminus S}\|_2 \leq 3\lambda_{d+1}^{-1/2} \|v\|_\Sigma$ .

193 (b)  $|S| \leq (7t)^{2t+1}d$ .

194 Once this set  $S$  has been found, the dictionary is simply the standard basis  $\{e_1, \dots, e_n\}$ , together  
 195 with a  $\Sigma$ -orthonormal basis for every set of  $t$  covariates in  $S$ . By guarantee (a), we can prove that  
 196 every  $t$ -sparse vector correlates with some element of this dictionary under the  $\Sigma$ -inner product. By  
 197 guarantee (b), the dictionary is much smaller than the brute-force dictionary that contains a basis for  
 198 all  $\binom{n}{t}$  sets of  $t$  covariates. Together, this gives an algorithmic proof for Theorem 2.3.

199 **Intuition for IterativePeeling().** We compute the set  $S$  via a new iterative method which  
 200 leverages knowledge of the small eigenspaces of  $\Sigma$ . See Algorithm 1 for the pseudocode. To com-  
 201 pute  $S$ , the algorithm `IterativePeeling()` first computes the orthogonal projection matrix  $P$  that  
 202 projects onto the subspace spanned by the top  $n - d$  eigenvectors of  $\Sigma$ . Starting with the set of  
 203 coordinates that correlate with  $\ker(P)$ , the procedure then iteratively grows  $S$  in such a way that at  
 204 each step, a new participant of each approximate sparse dependency is discovered, but  $S$  does not  
 205 become too much larger.

206 The intuition is as follows: as a preliminary attempt, we could identify all  $O(d)$  coordinates that  
 207 correlate (with respect to the standard inner product) with the lowest  $d$  eigenspaces of  $\Sigma$ . If e.g. the  
 208 covariates have a sparse dependency

$$X_1 + X_2 = 0,$$

209 then  $\ker \Sigma$  contains the vector  $e_1 + e_2$ , so the coordinates  $\{e_1, e_2\}$  will be correctly discovered.  
 210 Unfortunately, if  $\Sigma$  contains a more complex sparse dependency such as

$$\epsilon^{-1}(X_1 - X_2) - X_3 - X_4 = 0$$

211 where  $\epsilon > 0$  is very small, then this heuristic will discover  $\{e_1, e_2\}$  but miss  $\{e_3, e_4\}$ . For this  
 212 example, the solution is to notice that  $e_3$  and  $e_4$  *do* correlate with the subspace spanned by  $\ker(\Sigma) \cup$   
 213  $\{e_1, e_2\}$  (which contains  $e_3 + e_4$ ). In general, if  $S$  is the set of coordinates discovered thus far,  
 214 then by finding basis vectors that correlate with an appropriate subspace (of dimension at most  
 215  $|S|$ ), we can efficiently augment  $S$  with at least one new coordinate from each  $t$ -sparse approximate  
 216 dependency, without making  $S$  bigger by more than a factor of  $O(t)$ . Iterating this augmentation  $t$   
 217 times therefore provably identifies all problematic coordinates.

218 To formalize this intuition, the following lemma will be needed to bound how much  $S$  grows at each  
 219 iteration; it shows that the number of coordinates that correlate with a low-dimensional subspace is  
 220 not too large (proof deferred to Appendix B):

221 **Lemma 2.5.** Let  $V \subseteq \mathbb{R}^n$  be a subspace with  $d := \dim V$ . For some  $\alpha > 0$  define

$$S = \left\{ i \in [n] : \sup_{x \in V \setminus \{0\}} \frac{x_i}{\|x\|_2} \geq \alpha \right\}.$$

222 Then  $|S| \leq d/\alpha^2$ . Moreover, given a set of vectors that span  $V$ , we can compute  $S$  in time  $\text{poly}(n)$ .

223 We also define the set of vectors  $v$  that have unusually large norm outside a set  $S$ , compared to  
 224  $\sqrt{v^\top P v}$ , which is the distance from  $v$  to the subspace spanned by the bottom  $d$  eigenvectors of  $\Sigma$ :

225 **Definition 2.6.** For any matrix  $P \in \mathbb{R}^{n \times n}$  and subset  $S \subseteq [n]$ , define  $\mathcal{W}_{P,S} := \{v \in \mathbb{R}^n : \|v_{S^c}\|_2 >$   
 226  $3\sqrt{v^\top P v}\}$ .

227 We then formalize the guarantee of each iteration of `IterativePeeling()` as follows:

228 **Lemma 2.7.** Let  $n, t \in \mathbb{N}$  and let  $P : n \times n$  be an orthogonal projection matrix. Suppose  $\tau \geq 1$   
 229 and  $K \subseteq [n]$  satisfy

230 (a)  $P_{ii} \geq 1 - 1/(9t^2)$  for all  $i \notin K$ ,

231 (b)  $|\text{supp}(v) \setminus K| \leq \tau$  for every  $v \in B_0(t) \cap \mathcal{W}_{P,K}$ .

232 Then there exists a set  $\mathcal{I}_P(K)$  with  $|\mathcal{I}_P(K)| \leq 36t^2|K|$  such that

$$|\text{supp}(v) \setminus (\mathcal{I}_P(K) \cup K)| \leq \tau - 1$$

233 for all  $v \in B_0(t) \cap \mathcal{W}_{P,K}$ . Moreover, given  $P$ ,  $K$ , and  $t$ , we can compute  $\mathcal{I}_P(K)$  in time  $\text{poly}(n)$ .

234 **Proof sketch.** We define the set

$$\mathcal{I}_P(K) := \left\{ a \in [n] \setminus K : \sup_{x \in \text{span}\{Pe_i : i \in K\} \setminus \{0\}} \frac{|x_a|}{\|x\|_2} \geq 1/(6t) \right\}.$$

235 It is clear from Lemma B.2 (applied with parameters  $V := \text{span}\{Pe_i : i \in K\}$  and  $\alpha := 1/(6t)$ )  
 236 that  $|\mathcal{I}_P(K)| \leq 36t^2|K|$ , and that  $\mathcal{I}_P(K)$  can be computed in time  $\text{poly}(n)$ . It remains to show that  
 237  $|\mathcal{G}_P(v) \setminus (\mathcal{I}_P(K) \cup K)| \leq \tau - 1$  for all  $v \in B_0(t)$ .

238 Consider any  $v \in B_0(t) \cap \mathcal{W}_{P,K}$ . Then  $\|v_{K^c}\|_2 > 3\|Pv\|_2$ . It's sufficient to show that  $\mathcal{I}_P(K)$   
 239 contains some  $j \in \text{supp}(v) \setminus K$ , i.e. that there is some  $j \in \text{supp}(v) \setminus K$  such that  $e_j$  correlates with  
 240  $\text{span}\{P_i : i \in K\}$ . We accomplish this by showing that  $v_{K^c}$  correlates with  $Pv_K = \sum_{i \in K} v_i P_i$ .

241 At a high level, the reason for this is that  $v_{K^c}$  is close to  $Pv_{K^c}$  (since  $P_i \approx e_i$  for  $i \in K^c$ ),  
 242 and  $Pv = Pv_K + Pv_{K^c}$  is much smaller than  $Pv_{K^c} \approx v_{K^c}$ , so  $Pv_K$  and  $Pv_{K^c}$  must be highly  
 243 correlated. See Appendix B for the full proof. ■

244 We can now complete the proof of Lemma 2.4 by repeatedly invoking Lemma B.4.

245 **Proof of Lemma 2.4.** Let  $\Sigma = \sum_{i=1}^n \lambda_i u_i u_i^\top$  be the eigendecomposition of  $\Sigma$ , and let  $P :=$   
 246  $\sum_{i=d+1}^n u_i u_i^\top$  be the projection onto the top  $n - d$  eigenspaces of  $\Sigma$ . Set  $K_t = \{i \in [n] : P_{ii} <$   
 247  $1 - 1/(9t^2)\}$ . Because  $\text{tr}(P) = n - d$  and  $P_{ii} \leq 1$  for all  $i \in [n]$ , it must be that  $|K_t| \leq 9t^2d$ . Also,  
 248 for any  $v \in B_0(t) \cap \mathcal{W}_{P,K_t}$  we have trivially by  $t$ -sparsity that  $|\text{supp}(v) \setminus K_t| \leq t$ .

249 Define  $K_{t-1}$  to be  $K_t \cup \mathcal{I}_P(K_t)$  where  $\mathcal{I}_P(K_t)$  is as defined in Lemma B.4; we have the guarantees  
 250 that  $|K_{t-1}| \leq (1 + 36t^2)|K_t|$  and  $|\mathcal{G}_P(v) \setminus K_t| \leq t - 1$  for all  $v \in B_0(t) \cap \mathcal{W}_{P,K_t}$ . Since  $K_{t-1} \supseteq K_t$ ,  
 251 it holds that  $\mathcal{W}_{P,K_{t-1}} \subseteq \mathcal{W}_{P,K_t}$ , and thus  $|\mathcal{G}_P(v) \setminus K_t| \leq t - 1$  for all  $v \in B_0(t) \cap \mathcal{W}_{P,K_{t-1}}$ .  
 252 Moreover, since  $K_{t-1} \supseteq K_t$ , it obviously holds that  $P_{ii} \geq 1 - 1/(9t^2)$  for all  $i \notin K_{t-1}$ . This  
 253 means we can apply Lemma B.4 with  $\tau := t - 1$  and  $K := K_{t-1}$  and so iteratively define sets  
 254  $K_{t-2} \subseteq \dots \subseteq K_1 \subseteq K_0 \subseteq [n]$  in the same way. In the end, we obtain the set  $K_0 \subseteq [n]$  with  
 255  $|K_0| \leq 9t^2d(1 + 36t^2)^t$  and  $\text{supp}(v) \subseteq K_0$  for all  $v \in B_0(t) \cap \mathcal{W}_{P,K_0}$ . The latter guarantee means  
 256 that in fact  $B_0(t) \cap \mathcal{W}_{P,K_0} = \emptyset$ . So for any  $t$ -sparse  $v \in \mathbb{R}^n$  it holds that

$$\|v_{K_0^c}\|_2 \leq 3\sqrt{v^\top P v} \leq 3\lambda_{d+1}^{-1/2} \sqrt{v^\top \Sigma v}$$

257 where the last inequality holds since  $\lambda_{d+1} P \preceq \Sigma$ . ■

## 258 2.3 Beyond weak learning

259 So far, we have sketched a proof that if  $\Sigma$  has few outlier eigenvalues, then there is an efficient  
 260 algorithm to compute a good dictionary (as in Theorem 2.3). This gives an efficient  $\alpha$ -weak learning  
 261 algorithm (via Proposition A.5). However, our ultimate goal is to find a regressor  $\hat{v}$  with prediction  
 262 error going to 0 as the number of samples increases. Definition 2.1 is not strong enough to ensure  
 263 this.<sup>4</sup> However, it turns out that the dictionary constructed in Theorem 2.3 in fact satisfies a stronger  
 264 guarantee<sup>5</sup> that is sufficient to achieve vanishing prediction error:

265 **Definition 2.8.** Let  $\Sigma \in \mathbb{R}^{n \times n}$  be a positive semi-definite matrix and let  $t, B > 0$ . A set  
 266  $\{D_1, \dots, D_N\} \subseteq \mathbb{R}^n$  is a  $(t, B)$ - $\ell_1$ -representation for  $\Sigma$  if for any  $t$ -sparse  $v \in \mathbb{R}^n$  there is some  
 267  $\alpha \in \mathbb{R}^N$  with  $v = \sum_{i=1}^N \alpha_i D_i$  and  $\sum_{i=1}^N |\alpha_i| \cdot \|D_i\|_\Sigma \leq B \cdot \|v\|_\Sigma$ .

268 With this definition in hand, we can actually prove the following strengthening of Theorem 2.3:

269 **Lemma 2.9.** Let  $n, t, d \in \mathbb{N}$ . Let  $\Sigma \in \mathbb{R}^{n \times n}$  be a positive semi-definite matrix with eigen-  
 270 values  $\lambda_1 \leq \dots \leq \lambda_n$ . Then  $\Sigma$  has a  $(t, 7\sqrt{t}\sqrt{\lambda_n/\lambda_{d+1}})$ - $\ell_1$ -representation  $\mathcal{D}$  of size at most  
 271  $n + t(7t)^{2t^2+t}d^t$ . Moreover,  $\mathcal{D}$  can be computed in time  $t^{O(t^2)}d^t \text{poly}(n)$ .

<sup>4</sup>Moreover, standard notions of boosting weak learners (e.g. in distribution-free classification) do not apply in this setting.

<sup>5</sup>See Lemma A.3 for a proof that the  $\ell_1$ -representation property implies the  $(t, \alpha)$ -dictionary property.

**Proof sketch.** Let  $S$  be the output of `IterativePeeling`( $\Sigma, d, t$ ). The dictionary  $\mathcal{D}$  consists of the standard basis, together with a  $\Sigma$ -orthogonal basis for each set of  $t$  coordinates from  $S$ . The bound on  $|\mathcal{D}|$  comes from the guarantee  $|S| \leq (7t)^{2t+1}d$ . For any  $t$ -sparse vector  $v \in \mathbb{R}^n$ , we know that  $v_{S^c}$  is efficiently represented by the standard basis (because Theorem B.1 guarantees that  $\|v_{S^c}\|_2 \leq O(\lambda_{d+1}^{-1/2} \|v\|_\Sigma)$ ), and  $v_S$  is efficiently represented by one of the  $\Sigma$ -orthonormal bases. See Appendix B for the full proof. ■

Why is the above guarantee useful? If each  $D_i$  is normalized to unit  $\Sigma$ -norm, then the condition of  $(t, B)$ - $\ell_1$ -representability is equivalent to  $\|\alpha\|_1 \leq B \cdot \|v\|_\Sigma$ . That is, with respect to the new set of features, the regressor  $\alpha$  has bounded  $\ell_1$  norm. Thus, if we apply the Lasso with a set of features that is a  $(t, B)$ - $\ell_1$ -representation for  $\Sigma$ , then standard “slow rate” guarantees hold (proof in Section A):

**Proposition 2.10.** *Let  $n, m, N, t \in \mathbb{N}$  and  $B > 0$ . Let  $\Sigma \in \mathbb{R}^{n \times n}$  be a positive semi-definite matrix and let  $\mathcal{D}$  be a  $(t, B)$ - $\ell_1$ -representation of size  $N$  for  $\Sigma$ , normalized so that  $\|v\|_\Sigma = 1$  for all  $v \in \mathcal{D}$ . Fix a  $t$ -sparse vector  $w^* \in \mathbb{R}^n$ , let  $X_1, \dots, X_m \sim N(0, \Sigma)$  be independent and let  $y_i = \langle X_i, w^* \rangle + \xi_i$  where  $\xi_i \sim N(0, \sigma^2)$ . For any  $R > 0$ , define*

$$\hat{w} \in \underset{w \in \mathbb{R}^n: \|w\|_1 \leq BR}{\operatorname{argmin}} \|\mathbb{X}Dw - y\|_2^2$$

where  $D \in \mathbb{R}^{n \times N}$  is the matrix with columns comprising the elements of  $\mathcal{D}$ , and  $\mathbb{X} \in \mathbb{R}^{m \times n}$  is the matrix with rows  $X_1, \dots, X_m$ . So long as  $m = \Omega(\log(n/\delta))$  and  $\|w^*\|_\Sigma \in [R/2, R]$ , it holds with probability at least  $1 - \delta$  that

$$\|D\hat{w} - w^*\|_\Sigma^2 = O\left(B \|w^*\|_\Sigma \sigma \sqrt{\frac{\log(2n/\delta)}{m}} + \frac{\sigma^2 \log(4/\delta)}{m} + \frac{B^2 \|w^*\|_\Sigma^2 \log(n)}{m}\right).$$

Combining Proposition 2.10 with Lemma 2.9 shows that there is an algorithm with time complexity  $t^{O(t^2)} d^t \operatorname{poly}(n)$  and sample complexity  $O(\operatorname{poly}(t)(\lambda_n/\lambda_{d+1}) \log(n) \log(d))$  for finding a regressor with squared prediction error  $o(\sigma^2 + \|w^*\|_\Sigma^2)$ . This is a simplified version of Theorem 1.2. The full proof involves additional technical details (e.g. more careful analysis to take care of large eigenvalues, and to avoid needing an estimate  $R$  for  $\|w^*\|_\Sigma$ ) but the above exposition contains the central ideas. Theorem 1.1 similarly computes the set  $S$  from Lemma 2.4 but uses it to construct a different dictionary: the standard basis, plus a  $\Sigma$ -orthonormal basis for  $S$ .<sup>6</sup> See Appendix C for the full proofs and pseudocode.

### 3 Additional Results

We now return to Question 2.2 and ask whether there are other families of ill-conditioned  $\Sigma$  for which we can prove non-trivial bounds on  $\mathcal{N}_{t,\alpha}(\Sigma)$ .

First, we ask what can be shown for *arbitrary* covariance matrices. We prove that *every* covariance matrix  $\Sigma$  satisfies a non-trivial bound  $\mathcal{N}_{t,1/O(t^{3/2} \log n)}(\Sigma) \leq O(n^{t-1/2})$ . In fact, building on tools from computational geometry, we show the stronger result that  $\Sigma$  has a  $(t, O(t^{3/2} \log n))$ - $\ell_1$ -representation that of size  $O(n^{t-1/2})$ , that is computable from samples in time  $\tilde{O}(n^{t-\Omega(1/t)})$  for any constant  $t > 1$  (Theorem D.5). As a corollary, we provide the first sparse linear regression algorithm with time complexity that is a polynomial-factor better than brute force, and with near-optimal sample complexity, for any constant  $t$  and arbitrary  $\Sigma$  (proof in Section D):

**Theorem 3.1.** *Let  $n, m, t, B \in \mathbb{N}$  and  $\sigma > 0$ , and let  $\Sigma \in \mathbb{R}^{n \times n}$  be a positive-definite matrix. Let  $w^* \in \mathbb{R}^n$  be  $t$ -sparse, and suppose  $\|w^*\|_\Sigma \in [B/2, B]$ . Suppose  $m \geq \Omega(t \log n)$ . Let  $(X_i, y_i)_{i=1}^m$  be independent samples where  $X_i \sim N(0, \Sigma)$  and  $y_i = \langle X_i, w^* \rangle + N(0, \sigma^2)$ . Then there is an  $O(m^2 n^{t-1/2} + n^{t-\Omega(1/t)} \log^{O(t)} n)$ -time algorithm that, given  $(X_i, y_i)_{i=1}^m$ ,  $B$ , and  $\sigma^2$ , produces an estimate  $\hat{w} \in \mathbb{R}^n$  satisfying, with probability  $1 - o(1)$ ,*

$$\|\hat{w} - w^*\|_\Sigma^2 \leq \tilde{O}\left(\frac{\sigma^2}{\sqrt{m}} + \frac{\sigma \|w^*\|_\Sigma t^{3/2}}{\sqrt{m}} + \frac{\|w^*\|_\Sigma^2 t^3}{m}\right).$$

<sup>6</sup>More precisely, the algorithm just skips regularizing  $S$ , which is morally equivalent. As it is simpler to implement, that is shown in Algorithm 1, and analyzed for the proofs.



Second, one goal is to improve “sample complexity” (i.e. obtain  $\alpha$  without dependence on condition number) without paying too much in “time complexity” (i.e. retain bounds on  $\mathcal{N}_{t,\alpha}$  that are better than  $n^t$ ). To this end, we prove that the dependence on  $\kappa$  in the correlation level (see Fact A.4) can actually be replaced by dependence on  $\kappa$  in the dictionary size (proof in Appendix E):

**Theorem 3.2.** *Let  $n, t \in \mathbb{N}$ . Let  $\Sigma \in \mathbb{R}^{n \times n}$  be a positive-definite matrix with condition number  $\kappa$ . Then  $\mathcal{N}_{t,1/3^{t+1}}(\Sigma) \leq 2^{O(t^2)} \kappa^{2t+1} \cdot n$ .*

In particular, for any constant  $t = 1/\epsilon$ , our result shows that there is a nearly-linear size dictionary with *constant* correlations even for covariance matrices with *polynomially-large* condition number  $\kappa \leq n^{\epsilon/100}$ . While we are not currently aware of an efficient algorithm for computing the dictionary, the above bound nonetheless raises the interesting possibility that there may be a sample-efficient and computationally-efficient weak learning algorithm under a super-constant bound on  $\kappa$ .

## 4 Related work

**Dealing with correlated covariates.** There is considerable work on improving the performance of Lasso in situations where some clusters of covariates are highly correlated [47, 19, 2, 42, 21, 12, 27]. These methods can work well for two-sparse dependencies, but generally do not work as well for higher-order dependencies — hence they cannot be used to prove our main result. The approach of [2] is perhaps the closest in spirit to ours. They perform agglomerative clustering of correlated covariates, orthonormalize the clusters with respect to  $\Sigma$ , and apply Lasso (or solve an essentially equivalent group Lasso problem). This method fails, for example, when there is a single three-sparse dependency, and the remaining covariates have some mild correlations. Depending on the correlation threshold, their method will either aggressively merge all covariates into a single cluster, or fail to merge the dependent covariates.

**Feature adaptation and preconditioning.** Generalizations of Lasso via a preliminary change-of-basis (or explicitly altering the regularization term) have been studied in the past, but largely not to solve sparse linear regression per se; instead the goal has been using  $\ell_1$  regularization to encourage other structural properties such as piecewise continuity (e.g. in the “fused lasso”, see [35, 36, 20, 8] for some more examples). An exception is recent work showing that a “sparse preconditioning” step can enable Lasso to be statistically efficient for sparse linear regression when the covariates have a certain Markovian structure [23]. Our notion of feature adaptation via dictionaries generalizes sparse preconditioning, which corresponds to choosing a non-standard basis in which  $\Sigma$  becomes well-conditioned and the sparsity of the signal is preserved.

**Statistical query (SQ) model; sparse halfspaces.** From the complexity standpoint,  $\mathcal{N}_{t,\alpha}(\Sigma)$  is a covering number and therefore closely corresponds to a packing number  $\mathcal{P}_{t,\alpha}(\Sigma)$  (see Section A.1 for the definition). This packing number is essentially the *(correlational) statistical dimension*, which governs the complexity of sparse linear regression with covariates from  $N(0, \Sigma)$  in the (correlational) SQ model (see e.g. [14] for exposition of this model). Whereas strong  $n^{\Omega(t)}$  SQ lower bounds are known for related problems such as sparse parities with noise [29], no non-trivial (i.e. super-linear) lower bounds are known for sparse linear regression. Relatedly, in a COLT open problem, Feldman asked whether any non-trivial bounds can be shown for the complexity of weak learning sparse halfspaces in the SQ model [11]. Our results also yield improved bounds for weakly SQ-learning sparse halfspaces over certain families of multivariate Gaussian distributions.

**Improving brute-force for arbitrary  $\Sigma$ .** Several prior works have suggested improvements on brute-force search for variants of  $t$ -sparse linear regression [18, 16, 31, 6]. However, all of these have limitations preventing their application to the general setting we address in Theorem 3.1. Specifically, [18] requires  $\Omega(n^t)$  preprocessing time on the covariates; [16, 31] require noiseless responses; and [6] has time complexity scaling with  $\log^m n$  (since our random-design setting necessitates  $m \geq \Omega(t \log n)$ , their algorithm has time complexity much larger than  $n^t$ ).

## References

- [1] Peter J Bickel, Ya’acov Ritov, Alexandre B Tsybakov, et al. Simultaneous analysis of lasso and dantzig selector. *The Annals of statistics*, 37(4):1705–1732, 2009.

- 362 [2] Peter Bühlmann, Philipp Rütimann, Sara Van De Geer, and Cun-Hui Zhang. Correlated vari-  
363 ables in regression: clustering and sparse estimation. *Journal of Statistical Planning and*  
364 *Inference*, 143(11):1835–1858, 2013.
- 365 [3] Emmanuel Candes, Terence Tao, et al. The dantzig selector: Statistical estimation when  $p$  is  
366 much larger than  $n$ . *Annals of statistics*, 35(6):2313–2351, 2007.
- 367 [4] Emmanuel J Candes, Justin K Romberg, and Terence Tao. Stable signal recovery from incom-  
368 plete and inaccurate measurements. *Communications on Pure and Applied Mathematics: A*  
369 *Journal Issued by the Courant Institute of Mathematical Sciences*, 59(8):1207–1223, 2006.
- 370 [5] Emmanuel J Candes and Terence Tao. Decoding by linear programming. *IEEE transactions*  
371 *on information theory*, 51(12):4203–4215, 2005.
- 372 [6] Jean Cardinal and Aurélien Ooms. Algorithms for approximate sparse regression and nearest  
373 induced hulls. *Journal of Computational Geometry*, 13(1):377–398, 2022.
- 374 [7] Shaobing Chen and David Donoho. Basis pursuit. In *Proceedings of 1994 28th Asilomar*  
375 *Conference on Signals, Systems and Computers*, volume 1, pages 41–44. IEEE, 1994.
- 376 [8] Arnak S Dalalyan, Mohamed Hebiri, Johannes Lederer, et al. On the prediction performance  
377 of the lasso. *Bernoulli*, 23(1):552–581, 2017.
- 378 [9] Abhimanyu Das and David Kempe. Submodular meets spectral: Greedy algorithms for subset  
379 selection, sparse approximation and dictionary selection. *arXiv preprint arXiv:1102.3975*,  
380 2011.
- 381 [10] David L Donoho and Philip B Stark. Uncertainty principles and signal recovery. *SIAM Journal*  
382 *on Applied Mathematics*, 49(3):906–931, 1989.
- 383 [11] Vitaly Feldman. Open problem: The statistical query complexity of learning sparse halfspaces.  
384 In *Conference on Learning Theory*, pages 1283–1289. PMLR, 2014.
- 385 [12] Mario Figueiredo and Robert Nowak. Ordered weighted  $\ell_1$  regularized regression with strongly  
386 correlated covariates: Theoretical aspects. In *Artificial Intelligence and Statistics*, pages 930–  
387 938. PMLR, 2016.
- 388 [13] Dean P Foster and Edward I George. The risk inflation criterion for multiple regression. *The*  
389 *Annals of Statistics*, pages 1947–1975, 1994.
- 390 [14] Surbhi Goel, Aravind Gollakota, Zhihan Jin, Sushrut Karmalkar, and Adam Klivans. Super-  
391 polynomial lower bounds for learning one-layer neural networks using gradient descent. In  
392 *International Conference on Machine Learning*, pages 3587–3596. PMLR, 2020.
- 393 [15] Aparna Gupte and Vinod Vaikuntanathan. The fine-grained hardness of sparse linear regres-  
394 sion. *arXiv preprint arXiv:2106.03131*, 2021.
- 395 [16] Aparna Ajit Gupte and Kerri Lu. Fine-grained complexity of sparse linear regression. 2020.
- 396 [17] Gurobi Optimization, LLC. Gurobi Optimizer Reference Manual, 2023.
- 397 [18] Sarel Har-Peled, Piotr Indyk, and Sepideh Mahabadi. Approximate sparse linear regression.  
398 In *45th International Colloquium on Automata, Languages, and Programming (ICALP 2018)*.  
399 Schloss Dagstuhl-Leibniz-Zentrum fuer Informatik, 2018.
- 400 [19] Jim C Huang and Nebojsa Jojic. Variable selection through correlation sifting. In *RECOMB*,  
401 volume 6577, pages 106–123. Springer, 2011.
- 402 [20] Jan-Christian Hütter and Philippe Rigollet. Optimal rates for total variation denoising. In  
403 *Conference on Learning Theory*, pages 1115–1146. PMLR, 2016.
- 404 [21] Jinzhu Jia, Karl Rohe, et al. Preconditioning the lasso for sign consistency. *Electronic Journal*  
405 *of Statistics*, 9(1):1150–1172, 2015.
- 406 [22] Jonathan Kelner, Frederic Koehler, Raghu Meka, and Ankur Moitra. Learning some popu-  
407 lar gaussian graphical models without condition number bounds. In *Proceedings of Neural*  
408 *Information Processing Systems (NeurIPS)*, 2020.
- 409 [23] Jonathan Kelner, Frederic Koehler, Raghu Meka, and Dhruv Rohatgi. On the power of pre-  
410 conditioning in sparse linear regression. *62nd Annual IEEE Symposium on Foundations of*  
411 *Computer Science*, 2021.

- [24] Jonathan A Kelner, Frederic Koehler, Raghu Meka, and Dhruv Rohatgi. Distributional hardness against preconditioned lasso via erasure-robust designs. *arXiv preprint arXiv:2203.02824*, 2022.
- [25] Guillaume Lecué and Shahar Mendelson. Learning subgaussian classes: Upper and minimax bounds. *arXiv preprint arXiv:1305.4825*, 2013.
- [26] Yin Tat Lee, Aaron Sidford, and Sam Chiu-wai Wong. A faster cutting plane method and its implications for combinatorial and convex optimization. In *2015 IEEE 56th Annual Symposium on Foundations of Computer Science*, pages 1049–1065. IEEE, 2015.
- [27] Yuan Li, Benjamin Mark, Garvesh Raskutti, and Rebecca Willett. Graph-based regularization for regression problems with highly-correlated designs. In *2018 IEEE Global Conference on Signal and Information Processing (GlobalSIP)*, pages 740–742. IEEE, 2018.
- [28] Shahar Mendelson et al. On the performance of kernel classes. 2003.
- [29] Elchanan Mossel, Ryan O’Donnell, and Rocco P Servedio. Learning juntas. In *Proceedings of the thirty-fifth annual ACM symposium on Theory of computing*, pages 206–212, 2003.
- [30] Wolfgang Mulzer, Huy L Nguyễn, Paul Seiferth, and Yannik Stein. Approximate k-flat nearest neighbor search. In *Proceedings of the forty-seventh annual ACM symposium on Theory of Computing*, pages 783–792, 2015.
- [31] Eric Price, Sandeep Silwal, and Samson Zhou. Hardness and algorithms for robust and sparse optimization. In *International Conference on Machine Learning*, pages 17926–17944. PMLR, 2022.
- [32] Garvesh Raskutti, Martin J Wainwright, and Bin Yu. Restricted eigenvalue properties for correlated gaussian designs. *The Journal of Machine Learning Research*, 11:2241–2259, 2010.
- [33] Phillippe Rigollet and Jan-Christian Hütter. High dimensional statistics. *Lecture notes for course 18S997*, 813:814, 2015.
- [34] Nathan Srebro, Karthik Sridharan, and Ambuj Tewari. Optimistic rates for learning with a smooth loss. *arXiv preprint arXiv:1009.3896*, 2010.
- [35] Robert Tibshirani, Michael Saunders, Saharon Rosset, Ji Zhu, and Keith Knight. Sparsity and smoothness via the fused lasso. *Journal of the Royal Statistical Society: Series B (Statistical Methodology)*, 67(1):91–108, 2005.
- [36] Ryan J Tibshirani and Jonathan Taylor. The solution path of the generalized lasso. *The annals of statistics*, 39(3):1335–1371, 2011.
- [37] Gregory Valiant. Finding correlations in subquadratic time, with applications to learning parities and juntas. In *2012 IEEE 53rd Annual Symposium on Foundations of Computer Science*, pages 11–20. IEEE, 2012.
- [38] Sara Van De Geer. On tight bounds for the lasso. *Journal of Machine Learning Research*, 19:46, 2018.
- [39] Sara A Van de Geer. *Empirical Processes in M-estimation*, volume 6. Cambridge university press, 2000.
- [40] Sara A Van De Geer, Peter Bühlmann, et al. On the conditions used to prove oracle results for the lasso. *Electronic Journal of Statistics*, 3:1360–1392, 2009.
- [41] Roman Vershynin. *High-dimensional probability: An introduction with applications in data science*, volume 47. Cambridge university press, 2018.
- [42] Fabian L Wauthier, Nebojsa Jojic, and Michael I Jordan. A comparative framework for preconditioned lasso algorithms. *Advances in Neural Information Processing Systems*, 26:1061–1069, 2013.
- [43] Tong Zhang. Learning bounds for kernel regression using effective data dimensionality. *Neural Computation*, 17(9):2077–2098, 2005.
- [44] Yuchen Zhang, Martin J Wainwright, Michael I Jordan, et al. Optimal prediction for sparse linear models? lower bounds for coordinate-separable m-estimators. *Electronic Journal of Statistics*, 11(1):752–799, 2017.

- 462 [45] Lijia Zhou, Frederic Koehler, Danica J Sutherland, and Nathan Srebro. Optimistic rates: A  
463 unifying theory for interpolation learning and regularization in linear regression. *arXiv preprint*  
464 *arXiv:2112.04470*, 2021.
- 465 [46] Shuheng Zhou. Restricted eigenvalue conditions on subgaussian random matrices. *arXiv*  
466 *preprint arXiv:0912.4045*, 2009.
- 467 [47] Hui Zou and Trevor Hastie. Regularization and variable selection via the elastic net. *Journal*  
468 *of the royal statistical society: series B (statistical methodology)*, 67(2):301–320, 2005.

## 469 A Preliminaries

470 Throughout, we use the following standard notation. For positive integers  $n, m \in \mathbb{N}$ , we write  
 471  $A : m \times n$  to denote a matrix with  $m$  rows,  $n$  columns, and real-valued entries. The standard inner  
 472 product on  $\mathbb{R}^n$  is denoted  $\langle u, v \rangle := u^\top v$ . For a positive semi-definite matrix  $\Sigma : n \times n$  we define  
 473 the  $\Sigma$ -inner product on  $\mathbb{R}^n$  by  $\langle u, v \rangle_\Sigma := u^\top \Sigma v$  and the  $\Sigma$ -norm by  $\|u\|_\Sigma = \sqrt{\langle u, u \rangle_\Sigma}$ . For  $n \in \mathbb{N}$   
 474 (made clear by context) we let  $e_1, \dots, e_n \in \mathbb{R}^n$  be the standard basis vectors  $e_i(j) := \mathbb{1}[j = i]$ . For  
 475 a vector  $v \in \mathbb{R}^n$  and set  $S \subseteq [n]$  we write  $v_S$  to denote the restriction of  $v$  to coordinates in  $S$ . For  
 476 symmetric matrices  $A, B : n \times n$  we write  $A \preceq B$  to denote that  $B - A$  is positive semi-definite.

### 477 A.1 Covering, packing, and $\ell_1$ -representability

478 We previously defined the covering number of  $t$ -sparse vectors with respect to a covariance matrix  $\Sigma$ .  
 479 We next define the packing number (i.e. correlational statistical dimension) and  $\ell_1$ -representability,  
 480 and discuss the connections between these quantities as well as their algorithmic implications.

481 **Definition A.1.** Let  $\Sigma : n \times n$  be a positive semi-definite matrix and let  $t, \alpha > 0$ . A set  
 482  $\{v_1, \dots, v_N\} \subseteq \mathbb{R}^n$  is a  $(t, \alpha)$ -packing for  $\Sigma$  if every  $v_i$  is  $t$ -sparse, and

$$|\langle v_i, v_j \rangle_\Sigma| < \alpha \|v_i\|_\Sigma \|v_j\|_\Sigma$$

483 for all  $i, j \in [N]$  with  $i \neq j$ . The (correlational) statistical dimension of  $t$ -sparse vectors with  
 484 maximum correlation  $\alpha$ , under the  $\Sigma$ -inner product, is denoted  $\mathcal{P}_{t, \alpha}(\Sigma)$  and defined as the size of  
 485 the largest  $(t, \alpha)$ -packing.

486 We will make use of the following connections between packing, covering, and  $\ell_1$ -representability.

487 **Lemma A.2** (Covering  $\Leftrightarrow$  packing). *For any positive semi-definite matrix  $\Sigma : n \times n$  and  $t, \alpha > 0$ ,  
 488 it holds that  $(\alpha^2/3)\mathcal{P}_{t, \alpha^2/2}(\Sigma) \leq \mathcal{N}_{t, \alpha}(\Sigma) \leq \mathcal{P}_{t, \alpha}(\Sigma)$ .*

489 *Proof. First inequality.* Let  $\{D_1, \dots, D_N\}$  be any maximum-size  $(t, \alpha^2/2)$ -packing. Since the  
 490  $D_i$ 's are all  $t$ -sparse, each must be correlated with some element of a  $(t, \alpha)$ -dictionary. Thus, it  
 491 suffices to show that for any  $v \in \mathbb{R}^n$ , the set  $S(v) := \{i \in [N] : |\langle D_i, v \rangle_\Sigma| \geq \alpha \|D_i\|_\Sigma \|v\|_\Sigma\}$  has  
 492 size  $|S(v)| \leq 3/\alpha^2$ . Indeed, for any  $i, j \in S(v)$  with  $i \neq j$ , we have by the definition of a packing  
 493 that

$$\begin{aligned} \left\langle D_i - \frac{\langle D_i, v \rangle_\Sigma}{\|v\|_\Sigma^2} v, D_j - \frac{\langle D_j, v \rangle_\Sigma}{\|v\|_\Sigma^2} v \right\rangle_\Sigma &= \langle D_i, D_j \rangle_\Sigma - \frac{\langle D_i, v \rangle_\Sigma \langle D_j, v \rangle_\Sigma}{\|v\|_\Sigma^2} \\ &\leq -\frac{\alpha^2}{2} \|D_i\|_\Sigma \|D_j\|_\Sigma. \end{aligned}$$

494 For each  $i \in S(v)$  define  $R_i = D_i - \langle D_i, v \rangle_\Sigma v / \|v\|_\Sigma^2$ . Then

$$0 \leq \left\| \sum_{i \in S(v)} \frac{R_i}{\|R_i\|_\Sigma} \right\|_\Sigma^2 = |S(v)| + \sum_{i, j \in S(v): i \neq j} \frac{\langle R_i, R_j \rangle_\Sigma}{\|R_i\|_\Sigma \|R_j\|_\Sigma} \leq |S(v)| - |S(v)|(|S(v)| - 1) \cdot \frac{\alpha^2}{2}$$

495 where the last inequality uses the bound  $\|R_i\|_\Sigma \leq \|D_i\|_\Sigma$ . Rearranging gives  $|S(v)| \leq 1 + (2/\alpha^2)$ .

496 **Second inequality.** Let  $\{D_1, \dots, D_N\}$  be any maximal  $(t, \alpha)$ -packing. Then for any  $t$ -sparse  
 497  $v \in \mathbb{R}^n$ , maximality implies that there must be some  $i \in [N]$  with  $|\langle D_i, v \rangle_\Sigma| \geq \alpha \|D_i\|_\Sigma \|v\|_\Sigma$ .  
 498 So  $\{D_1, \dots, D_N\}$  is also a  $(t, \alpha)$ -dictionary.  $\square$

499 **Lemma A.3** ( $\ell_1$ -representation  $\Rightarrow$  covering). *Let  $\Sigma : n \times n$  be a positive semi-definite matrix  
 500 and let  $t, B > 0$ . If  $\{D_1, \dots, D_N\} \subseteq \mathbb{R}^n$  is a  $(t, B)$ - $\ell_1$ -representation for  $\Sigma$ , then it is also a  
 501  $(t, 1/B)$ -dictionary for  $\Sigma$ .*

502 *Proof.* Pick any  $t$ -sparse  $v \in \mathbb{R}^n$ . By  $\ell_1$ -representability, there is some  $\alpha \in \mathbb{R}^N$  with  $v =$   
503  $\sum_{i=1}^N \alpha_i D_i$  and  $\sum_{i=1}^N |\alpha_i| \cdot \|D_i\|_\Sigma \leq B \cdot \|v\|_\Sigma$ . Hence

$$\begin{aligned} \|v\|_\Sigma^2 &= \sum_{i=1}^N \alpha_i \langle v, D_i \rangle_\Sigma \\ &\leq \sum_{i=1}^N |\alpha_i| \|v\|_\Sigma \|D_i\|_\Sigma \cdot \max_{j \in [N]} \frac{|\langle v, D_j \rangle_\Sigma|}{\|v\|_\Sigma \|D_j\|_\Sigma} \\ &\leq B \|v\|_\Sigma^2 \cdot \max_{j \in [N]} \frac{|\langle v, D_j \rangle_\Sigma|}{\|v\|_\Sigma \|D_j\|_\Sigma} \end{aligned}$$

504 and thus  $\max_{j \in [N]} \frac{|\langle v, D_j \rangle_\Sigma|}{\|v\|_\Sigma \|D_j\|_\Sigma} \geq 1/B$ .  $\square$

505 We can now easily prove that the standard basis is a good dictionary for well-conditioned  $\Sigma$ .

506 **Fact A.4.** Let  $\Sigma$  be a positive definite matrix with condition number  $\frac{\lambda_{\max}(\Sigma)}{\lambda_{\min}(\Sigma)} \leq \kappa$ . Under the  $\Sigma$ -inner  
507 product, every  $t$ -sparse vector is at least  $1/(\sqrt{\kappa}t)$ -correlated with some standard basis vector.

508 *Proof.* By Lemma A.3, it suffices to show that the standard basis  $\{e_1, \dots, e_n\}$  is a  $(t, \sqrt{\kappa}t)$ - $\ell_1$ -  
509 representation for  $\Sigma$ . Indeed, for any  $t$ -sparse  $v \in \mathbb{R}^n$ ,

$$\begin{aligned} \sum_{i=1}^n |v_i| \cdot \|e_i\|_\Sigma &\leq \sum_{i=1}^n |v_i| \cdot \sqrt{\lambda_{\max}(\Sigma)} \|e_i\|_2 = \sqrt{\lambda_{\max}(\Sigma)} \|v\|_1 \\ &\leq \sqrt{\lambda_{\max}(\Sigma)} \sqrt{t} \|v\|_2 \leq \sqrt{\frac{\lambda_{\max}(\Sigma)}{\lambda_{\min}(\Sigma)}} \sqrt{t} \|v\|_\Sigma \end{aligned}$$

510 as desired.  $\square$

## 511 A.2 Algorithmic implications

512 An existential proof that  $\mathcal{N}_{t,\alpha}(\Sigma)$  is small unfortunately does not in general give an efficient algo-  
513 rithm for constructing a concise dictionary. However, with the caveat that the dictionary must be  
514 given to the algorithm as advice, bounds on  $\mathcal{N}_{t,\alpha}$  do imply weak learning algorithms with sample  
515 complexity  $O(\alpha^{-2} \log(n))$ :

516 **Proposition A.5.** Let  $\Sigma : n \times n$  be a positive semi-definite matrix and let  $\mathcal{D}$  be a  $(t, \alpha)$ -dictionary for  
517  $\Sigma$ , for some  $t \in \mathbb{N}$  and  $\alpha \in (0, 1)$ . For  $m \in \mathbb{N}$  and  $t$ -sparse  $v^* \in \mathbb{R}^n$ , let  $X_1, \dots, X_m \sim N(0, \Sigma)$   
518 be independent and let  $y_i = \langle X_i, v^* \rangle + \xi_i$  where  $\xi_i \sim N(0, \sigma^2)$ . Define the estimator

$$\hat{v} = \underset{\substack{v \in \mathcal{D} \\ \beta \in \mathbb{R}}}{\operatorname{argmin}} \|\beta \mathbb{X} v - y\|_2^2$$

519 where  $\mathbb{X} : m \times n$  is the matrix with rows  $X_1, \dots, X_m$ . For any  $\delta > 0$ , if  $m \geq C\alpha^{-2} \log(32|\mathcal{D}|/\delta)$   
520 for a sufficiently large absolute constant  $C$ , then with probability at least  $1 - \delta$ ,

$$\|\hat{\beta} \hat{w} - w^*\|_\Sigma^2 \leq (1 - \alpha^2/4) \|w^*\|_\Sigma^2 + \frac{400\sigma^2 \log(4|\mathcal{D}|/\delta)}{\alpha^2 m}.$$

521 *Proof.* Since  $\mathcal{D}$  is a  $(t, \alpha)$ -dictionary, we know that there is some  $\tilde{v} \in \mathcal{D}$  with  $|\langle \tilde{v}, v^* \rangle_\Sigma| \geq$   
522  $\alpha \|\tilde{v}\|_\Sigma \|v^*\|_\Sigma$ . We then apply Lemma F.4.  $\square$

523 The above guarantee is essentially of the form “at least 1% of the signal variance can be explained”.  
524 Under the  $\ell_1$ -representability condition, something much stronger is true:

525 **Proposition A.6.** Let  $n, m, N, t \in \mathbb{N}$  and  $B > 0$ . Let  $\Sigma : n \times n$  be a positive semi-definite matrix  
526 and let  $\mathcal{D}$  be a  $(t, B)$ - $\ell_1$ -representation of size  $N$  for  $\Sigma$ , normalized so that  $\|v\|_\Sigma = 1$  for all  $v \in \mathcal{D}$ .

527 Fix a  $t$ -sparse vector  $v^* \in \mathbb{R}^n$ , let  $X_1, \dots, X_m \sim N(0, \Sigma)$  be independent and let  $y_i = \langle X_i, v^* \rangle + \xi_i$   
 528 where  $\xi_i \sim N(0, \sigma^2)$ . For any  $R > 0$ , define

$$\hat{w} \in \operatorname{argmin}_{w \in \mathbb{R}^N : \|w\|_1 \leq BR} \|\mathbb{X}Dw - y\|_2^2$$

529 where  $D : n \times N$  is the matrix with columns comprising the elements of  $\mathcal{D}$ , and  $\mathbb{X} : m \times n$  is  
 530 the matrix with rows  $X_1, \dots, X_m$ . So long as  $m = \Omega(\log(n/\delta))$  and  $R \geq \|v^*\|_\Sigma$ , it holds with  
 531 probability at least  $1 - \delta$  that

$$\|D\hat{w} - w^*\|_\Sigma^2 = O\left(BR\sigma\sqrt{\frac{\log(2n/\delta)}{m}} + \frac{\sigma^2 \log(4/\delta)}{m} + \frac{B^2 R^2 \log(n)}{m}\right).$$

532 *Proof.* By  $\ell_1$ -representability and normalization of  $\mathcal{D}$ , there is some  $w^* \in \mathbb{R}^N$  such that  $v^* = Dw^*$   
 533 and  $\|w^*\|_1 \leq B\|v^*\|_\Sigma \leq BR$ . Let  $\Gamma = D^\top \Sigma D$ . Also, by normalization,  $\max_i \Gamma_{ii} = 1$ . Thus, we  
 534 can apply standard “slow rate” Lasso guarantees to the samples  $(D^\top X_i, y_i)_{i=1}^m$  to get the claimed  
 535 bound (see e.g. Theorem 14 of [22]).  $\square$

### 536 A.3 Optimizing the Lasso in near-linear time

537 **Theorem A.7** (see e.g. Corollary 4 and Section 5.3 in [34]). Let  $n, m, B, H, T \in \mathbb{N}$  and  $\sigma > 0$ . Fix  
 538  $X_1, \dots, X_m \in \mathbb{R}^n$  with  $\|X_i\|_\infty \leq H$  for all  $i$ , and fix  $w^* \in \mathbb{R}^n$  with  $\|w^*\|_1 \leq B$ . For  $i \in [m]$  define  
 539  $y_i = \langle X_i, w^* \rangle + \xi_i$  where  $\xi_i \sim N(0, \sigma^2)$  are independent random variables. Given  $(X_i, y_i)_{i=1}^m$  as  
 540 well as  $B, T$ , and  $\sigma^2$ , there is an algorithm `MirrorDescentLasso` $((X_i, y_i)_{i=1}^m, B, T, \sigma^2)$ , which  
 541 optimizes the Lasso objective via  $T$  iterations of mirror descent, that produces an estimate  $\hat{w} \in \mathbb{R}^n$   
 542 satisfying  $\|\hat{w}\|_1 \leq B$  and, with probability  $1 - o(1)$ ,

$$\frac{1}{m} \|X\hat{w} - y\|_2^2 \leq \frac{1}{m} \|Xw^* - y\|_2^2 + \tilde{O}\left(\frac{H^2 B^2}{T} + \sqrt{\frac{H^2 B^2 \sigma^2}{T}}\right).$$

543 Moreover, the time complexity of `MirrorDescentLasso` $()$  is  $\tilde{O}(nmT)$ .

544 **Theorem A.8.** Let  $n, m, B, H \in \mathbb{N}$  and  $\sigma > 0$ . Let  $\Sigma : n \times n$  be positive semi-definite with  
 545  $\max_{j \in [n]} \Sigma_{jj} \leq H^2$ . Fix  $w^* \in \mathbb{R}^n$  with  $\|w^*\|_1 \leq B$ . Let  $(X_i, y_i)_{i=1}^m$  be independent draws where  
 546  $X_i \sim N(0, \Sigma)$  and  $y_i = \langle X_i, w^* \rangle + N(0, \sigma^2)$ . Then `MirrorDescentLasso` $((X_i, y_i)_{i=1}^m, B, m,$   
 547  $\sigma^2)$  computes, in time  $\tilde{O}(nm^2)$ , an estimate  $\hat{w}$  satisfying, with probability  $1 - o(1)$ ,

$$\|\hat{w} - w^*\|_\Sigma^2 \leq \tilde{O}\left(\frac{\sigma^2}{\sqrt{m}} + \frac{\sigma HB}{\sqrt{m}} + \frac{H^2 B^2}{m}\right)$$

548 *Proof.* Since  $\max_j \Sigma_{jj} \leq H$  we have that  $\max_i \|X_i\|_\infty \leq O(H \log n)$  with probability  $1 - o(1)$ .  
 549 Applying Theorem A.7 with this bound and with  $T = m$ , we obtain some  $\hat{w} \in \mathbb{R}^n$  with  $\|\hat{w}\|_1 \leq B$   
 550 and, with probability  $1 - o(1)$ ,

$$\frac{1}{m} \|X\hat{w} - y\|_2^2 \leq \frac{1}{m} \|Xw^* - y\|_2^2 + \epsilon$$

551 where  $\epsilon = \tilde{O}(H^2 B^2/m) + \sqrt{H^2 B^2 \sigma^2/m}$ . By  $\chi^2$ -concentration, we have  $\frac{1}{m} \|Xw^* - y\|_2^2 \leq$   
 552  $\sigma^2(1 + O(1/\sqrt{m}))$  with probability  $1 - o(1)$ . Thus,

$$\|X\hat{w} - y\|_2 \leq \|Xw^* - y\|_2 + \sqrt{\epsilon m} \leq \sigma\sqrt{m} + O(\sigma m^{1/4}) + \sqrt{\epsilon m}$$

553 and

$$\|X\hat{w} - y\|_2^2 \leq \|Xw^* - y\|_2^2 + m\epsilon \leq \sigma^2 m + O(\sigma^2 \sqrt{m}) + \epsilon m.$$

554 Next, since  $\sup_{w \in \mathbb{R}^n : \|w\|_1 \leq B} \langle w - w^*, x \rangle \leq 2B\|x\|_\infty \leq O(HB \log n)$  with probability  $1 - o(1)$   
 555 over  $x \sim N(0, \Sigma)$ , we can apply Theorem C.1 to get that with probability  $1 - o(1)$ ,

$$\|\hat{w} - w^*\|_\Sigma^2 + \sigma^2 \leq \frac{1 + \tilde{O}(1/\sqrt{m})}{m} (\|X\hat{w} - y\|_2 + \tilde{O}(HB))^2.$$

556 Substituting the bounds on  $\|X\hat{w} - y\|_2$  and  $\|X\hat{w} - y\|_2^2$  gives

$$\|\hat{w} - w^*\|_\Sigma^2 + \sigma^2 \leq \sigma^2 + O(\sigma^2 m^{-1/2} + \epsilon) + \tilde{O}(\sigma HBm^{-1/2} + HB\sqrt{\epsilon/m}) + \tilde{O}(H^2 B^2/m).$$

557 Substituting in the value of  $\epsilon$  and simplifying, we get

$$\|\hat{w} - w^*\|_\Sigma^2 \leq \tilde{O}\left(\frac{\sigma^2}{\sqrt{m}} + \frac{\sigma HB}{\sqrt{m}} + \frac{H^2 B^2}{m}\right)$$

558 as claimed.  $\square$

## 559 B Iterative Peeling

560 In this section we give the complete proof of Lemma 2.4, restated below as Theorem B.1, which  
 561 describes the guarantees of `IterativePeeling()` (see Algorithm 1). This is a key ingredient in  
 562 the proofs of Theorems 1.1 and 1.2. We also use it to formally prove Theorem 2.3, as well as  
 563 Lemma 2.9.

564 **Theorem B.1.** *Let  $n, t, d \in \mathbb{N}$ . Let  $\Sigma : n \times n$  be a positive semi-definite matrix with eigenvalues  
 565  $\lambda_1 \leq \dots \leq \lambda_n$ . Given  $\Sigma$ ,  $d$ , and  $t$ , there is a polynomial-time algorithm `IterativePeeling()`  
 566 producing a set  $S \subseteq [n]$  with the following guarantees:*

- 567 • For every  $t$ -sparse  $v \in \mathbb{R}^n$ , it holds that  $\|v_{[n] \setminus S}\|_2 \leq 3\lambda_{d+1}^{-1/2} \|v\|_\Sigma$ .
- 568 •  $|S| \leq (7t)^{2t+1} d$ .

569 Essentially, the set  $S$  contains every coordinate  $i \in [n]$  that “participates” in an approximate sparse  
 570 dependency, in the sense that there is some sparse linear combination of the covariates with small  
 571 variance compared to the coefficient on  $i$ . To compute  $S$ , the algorithm `IterativePeeling()` first  
 572 computes the orthogonal projection matrix  $P$  that projects onto the subspace spanned by the top  $n-d$   
 573 eigenvectors of  $\Sigma$ . Starting with the set of coordinates that correlate with  $\ker(P)$ , the procedure then  
 574 iteratively grows  $S$  in such a way that at each step, a new participant of each approximate sparse  
 575 dependency is discovered, but  $S$  does not become too much larger.

576 The following lemma will be needed to bound how much  $S$  grows at each iteration:

577 **Lemma B.2.** *Let  $V \subseteq \mathbb{R}^n$  be a subspace with  $d := \dim V$ . For some  $\alpha > 0$  define*

$$S = \left\{ i \in [n] : \sup_{x \in V \setminus \{0\}} \frac{x_i}{\|x\|_2} \geq \alpha \right\}.$$

578 *Then  $|S| \leq d/\alpha^2$ . Moreover, given a set of vectors that span  $V$ , we can compute  $S$  in time  $\text{poly}(n)$ .*

579 *Proof.* Let  $k := |S|$  and without loss of generality suppose  $S = \{1, \dots, k\}$ . Define a matrix  
 580  $A \in \mathbb{R}^{n \times n}$  as follows. For  $1 \leq i \leq k$  let row  $A_i \in V$  be some vector such that  $\|A_i\|_2 = 1$   
 581 and  $A_{ii} \geq \alpha$ . For  $k+1 \leq i \leq n$  let  $A_i = 0$ . Then  $\text{tr}(A) \geq k\alpha$  and  $\|A\|_F = \sqrt{k}$ . However,  
 582  $\text{rank}(A) \leq d$ , so the singular values  $\sigma_1 \geq \sigma_2 \geq \dots \geq \sigma_n \geq 0$  of  $A$  satisfy  $\sigma_{d+1} = 0$ . Thus,

$$k\alpha \leq \text{tr}(A) \leq \sum_{i=1}^n \sigma_i \leq \sqrt{d} \sqrt{\sum_{i=1}^n \sigma_i^2} = \sqrt{d} \|A\|_F = \sqrt{dk}$$

583 where the second inequality is by e.g. Von Neumann’s trace inequality, and the third inequality is  
 584 by  $d$ -sparsity of the vector  $\sigma$ . It follows that  $k \leq d/\alpha^2$  as claimed.

585 Let  $A$  be the matrix with columns consisting of the given spanning set for  $V$ . By Gram-Schmidt,  
 586 we may transform the spanning set into an orthonormal basis for  $V$ , so that  $A$  has  $d$  columns, and  
 587  $A^\top A = I_d$ . Fix  $i \in [n]$ . Then  $\sup_{x \in V \setminus \{0\}} x_i / \|x\|_2 \geq \alpha$  if and only if  $(Av)_i^2 - \alpha^2 \|Av\|_2^2 \geq 0$  for  
 588 some nonzero  $v \in \mathbb{R}^d$ . Equivalently,  $(Av)_i^2 \geq \alpha^2$  for some unit vector  $v$ . This is possible if and  
 589 only if  $\|A_i\|_2 \geq \alpha$  (where  $A_i$  is the  $i$ -th row of  $A$ ), which can be checked in polynomial time.  $\square$

590 For notational convenience, we also define the set  $\mathcal{W}_{P,S}$  of vectors  $v$  with unusually large norm  
 591 outside the set  $S$ .



592 **Definition B.3.** For any matrix  $P : n \times n$  and subset  $S \subseteq [n]$ , define  $\mathcal{W}_{P,S} := \{v \in \mathbb{R}^n : \|v_{S^c}\|_2 >$   
593  $3\sqrt{v^\top P v}\}$ .

594 We then formalize the guarantee of each iteration of `IterativePeeling()` as follows:

595 **Lemma B.4.** Let  $n, t \in \mathbb{N}$  and let  $P : n \times n$  be an orthogonal projection matrix. Suppose  $\tau \geq 1$   
596 and  $K \subseteq [n]$  satisfy

- 597 (a)  $P_{ii} \geq 1 - 1/(9t^2)$  for all  $i \notin K$ ,  
598 (b)  $|\text{supp}(v) \setminus K| \leq \tau$  for every  $v \in B_0(t) \cap \mathcal{W}_{P,K}$ .

599 Then there exists a set  $\mathcal{I}_P(K)$  with  $|\mathcal{I}_P(K)| \leq 36t^2|K|$  such that

$$|\text{supp}(v) \setminus (\mathcal{I}_P(K) \cup K)| \leq \tau - 1$$

600 for all  $v \in B_0(t) \cap \mathcal{W}_{P,K}$ . Moreover, given  $P$ ,  $K$ , and  $t$ , we can compute  $\mathcal{I}_P(K)$  in time  $\text{poly}(n)$ .

601 *Proof.* We define the set

$$\mathcal{I}_P(K) := \left\{ a \in [n] \setminus K : \sup_{x \in \text{span}\{Pe_i : i \in K\} \setminus \{0\}} \frac{|x_a|}{\|x\|_2} \geq 1/(6t) \right\}.$$

602 It is clear from Lemma B.2 (applied with parameters  $V := \text{span}\{Pe_i : i \in K\}$  and  $\alpha := 1/(6t)$ )  
603 that  $|\mathcal{I}_P(K)| \leq 36t^2|K|$ , and that  $\mathcal{I}_P(K)$  can be computed in time  $\text{poly}(n)$ . It remains to show that  
604  $|\text{supp}(v) \setminus (\mathcal{I}_P(K) \cup K)| \leq \tau - 1$  for all  $v \in B_0(t) \cap \mathcal{W}_{P,K}$ .

605 Consider any  $v \in B_0(t) \cap \mathcal{W}_{P,K}$ . Then  $\|v_{K^c}\|_2 > 3\sqrt{v^\top P v}$ . We have

$$\frac{\|v_{K^c}\|_2^2}{9} > v^\top P v = \|Pv\|_2^2 = \left\| \sum_{i=1}^n v_i P_i \right\|_2^2 \quad (1)$$

606 where the first equality uses the fact that  $P$  is a projection matrix. We also know that

$$\left\| \sum_{i \in [n] \setminus K} v_i (P_i - e_i) \right\|_2 \leq \sum_{i \in [n] \setminus K} |v_i| \|P_i - e_i\|_2 \leq \frac{1}{3\sqrt{t}} \|v_{K^c}\|_1 \leq \frac{1}{3} \|v_{K^c}\|_2 \quad (2)$$

607 by the triangle inequality, the bound  $\|P_i - e_i\|_2^2 = (I - P)_{ii} = 1 - P_{ii} \leq 1/(9t)$  (since  $i \notin K$ ),  
608 and  $t$ -sparsity of  $v$ . Moreover, (2) implies that

$$\left\| \sum_{i \in [n] \setminus K} v_i P_i \right\|_2 \leq \left\| \sum_{i \in [n] \setminus K} v_i (P_i - e_i) \right\|_2 + \|v_{K^c}\|_2 \leq \frac{4}{3} \|v_{K^c}\|_2. \quad (3)$$

609 Combining (1) and (3), the triangle inequality gives

$$\left\| \sum_{i \in K} v_i P_i \right\|_2 \leq \left\| \sum_{i \in [n] \setminus K} v_i P_i \right\|_2 + \left\| \sum_{i=1}^n v_i P_i \right\|_2 \leq \frac{5}{3} \|v_{K^c}\|_2. \quad (4)$$

610 Next, observe that

$$\begin{aligned} \frac{\|v_{K^c}\|_2^2}{3} &> \left\| \sum_{i=1}^n v_i P_i \right\|_2 \|v_{K^c}\|_2 && \text{(by (1))} \\ &\geq \left| \left\langle \sum_{i=1}^n v_i P_i, v_{K^c} \right\rangle \right| && \text{(by Cauchy-Schwarz)} \\ &\geq \left| \left\langle \sum_{i \in [n] \setminus K} v_i P_i, v_{K^c} \right\rangle \right| - \left| \left\langle \sum_{i \in K} v_i P_i, v_{K^c} \right\rangle \right| && \text{(by triangle inequality)} \end{aligned}$$

$$\begin{aligned}
&\geq \left| \left\langle \sum_{i \in [n] \setminus K} v_i e_i, v_{K^c} \right\rangle \right| - \left| \left\langle \sum_{i \in [n] \setminus K} v_i (P_i - e_i), v_{K^c} \right\rangle \right| - \left| \left\langle \sum_{i \in K} v_i P_i, v_{K^c} \right\rangle \right| \\
&\hspace{15em} \text{(by triangle inequality)} \\
&\geq \|v_{K^c}\|_2^2 - \left\| \sum_{i \in [n] \setminus K} v_i (P_i - e_i) \right\|_2 \|v_{K^c}\|_2 - \left| \left\langle \sum_{i \in K} v_i P_i, v_{K^c} \right\rangle \right| \\
&\hspace{15em} \text{(by Cauchy-Schwarz)} \\
&\geq \|v_{K^c}\|_2^2 - \frac{1}{3} \|v_{K^c}\|_2^2 - \left| \left\langle \sum_{i \in K} v_i P_i, v_{K^c} \right\rangle \right| \hspace{10em} \text{(by (2))}
\end{aligned}$$

611 and hence

$$\left| \left\langle \sum_{i \in K} v_i P_i, v_{K^c} \right\rangle \right| > \frac{1}{3} \|v_{K^c}\|_2^2 \geq \frac{1}{5} \|v_{K^c}\|_2 \left\| \sum_{i \in K} v_i P_i \right\|_2$$

612 where the last inequality is by (4). On the other hand, observe that

$$\left| \left\langle \sum_{i \in K} v_i P_i, v_{K^c} \right\rangle \right| \leq \sum_{j \in [n] \setminus K} |v_j| \cdot \left| \left\langle \sum_{i \in K} v_i P_i, e_j \right\rangle \right| \leq \sqrt{t} \|v_{K^c}\|_2 \max_{j \in \text{supp}(v) \setminus K} \left| \left\langle \sum_{i \in K} v_i P_i, e_j \right\rangle \right|.$$

613 Hence, there is some  $j \in \text{supp}(v) \setminus K$  such that

$$\left| \left\langle \sum_{i \in K} v_i P_i, e_j \right\rangle \right| > \frac{1}{5\sqrt{t}} \left\| \sum_{i \in K} v_i P_i \right\|_2.$$

614 So the vector  $x(v) := \sum_{i \in K} v_i P_i \in \text{span}\{P_i : i \in K\}$  satisfies  $|x(v)_j| > \|x(v)\|_2 / (5\sqrt{t})$ .  
615 Moreover,  $x(v)$  is nonzero since  $|x(v)_j| > 0$ . Thus,  $j \in \mathcal{I}_P(K)$ . Since we chose  $j$  to be in  
616  $\text{supp}(v) \setminus K$ , it follows that

$$|\text{supp}(v) \setminus (\mathcal{I}_P(K) \cup K)| \leq |\text{supp}(v) \setminus K| - 1 \leq \tau - 1$$

617 where the last inequality is by assumption (b) in the lemma statement.  $\square$

618 We can now complete the proof of Theorem B.1 by repeatedly invoking Lemma B.4 (this proof was  
619 given in Section 2.2 and is duplicated here for completeness).

620 **Proof of Theorem B.1.** Let  $\Sigma = \sum_{i=1}^n \lambda_i u_i u_i^\top$  be the eigendecomposition of  $\Sigma$ , and let  $P :=$   
621  $\sum_{i=d+1}^n u_i u_i^\top$  be the projection onto the top  $n - d$  eigenspaces of  $\Sigma$ . Set  $K_t = \{i \in [n] : P_{ii} <$   
622  $1 - 1/(9t^2)\}$ . Because  $\text{tr}(P) = n - d$  and  $P_{ii} \leq 1$  for all  $i \in [n]$ , it must be that  $|K_t| \leq 9t^2 d$ . Also,  
623 for any  $v \in B_0(t) \cap \mathcal{W}_{P, K_t}$  we have trivially by  $t$ -sparsity that  $|\text{supp}(v) \setminus K_t| \leq t$ .

624 Define  $K_{t-1}$  to be  $K_t \cup \mathcal{I}_P(K_t)$  where  $\mathcal{I}_P(K_t)$  is as defined in Lemma B.4; we have the guarantees  
625 that  $|K_{t-1}| \leq (1 + 36t^2)|K_t|$  and  $|\mathcal{G}_P(v) \setminus K_t| \leq t - 1$  for all  $v \in B_0(t) \cap \mathcal{W}_{P, K_t}$ . Since  $K_{t-1} \supseteq K_t$ ,  
626 it holds that  $\mathcal{W}_{P, K_{t-1}} \subseteq \mathcal{W}_{P, K_t}$ , and thus  $|\mathcal{G}_P(v) \setminus K_t| \leq t - 1$  for all  $v \in B_0(t) \cap \mathcal{W}_{P, K_{t-1}}$ .  
627 Moreover, since  $K_{t-1} \supseteq K_t$ , it obviously holds that  $P_{ii} \geq 1 - 1/(9t^2)$  for all  $i \notin K_{t-1}$ . This  
628 means we can apply Lemma B.4 with  $\tau := t - 1$  and  $K := K_{t-1}$  and so iteratively define sets  
629  $K_{t-2} \subseteq \dots \subseteq K_1 \subseteq K_0 \subseteq [n]$  in the same way. In the end, we obtain the set  $K_0 \subseteq [n]$  with  
630  $|K_0| \leq 9t^2 d(1 + 36t^2)^t$  and  $\text{supp}(v) \subseteq K_0$  for all  $v \in B_0(t) \cap \mathcal{W}_{P, K_0}$ . The latter guarantee means  
631 that in fact  $B_0(t) \cap \mathcal{W}_{P, K_0} = \emptyset$ . So for any  $t$ -sparse  $v \in \mathbb{R}^n$  it holds that

$$\|v_{K_0^c}\|_2 \leq 3\sqrt{v^\top P v} \leq 3\lambda_{d+1}^{-1/2} \sqrt{v^\top \Sigma v}$$

632 where the last inequality holds since  $\lambda_{d+1} P \preceq \Sigma$ .  $\blacksquare$

**Proof of Lemma 2.9.** By Theorem B.1, there is a polynomial-time computable set  $S \subseteq [n]$  such that  $\|v_{S^c}\|_2 \leq 3\sqrt{t}\lambda_{d+1}^{-1/2} \|v\|_\Sigma$  for all  $v \in B_0(t)$ , and  $|S| \leq (7t)^{2t+1}d$ . Let the dictionary  $\mathcal{D}$  consist of the standard basis  $\{e_1, \dots, e_n\}$  together with a  $\Sigma$ -orthogonal basis for each subspace spanned by  $t$  vectors in  $\{e_i : i \in S\}$ . Let  $v \in \mathbb{R}^n$  be  $t$ -sparse. Let  $v_S$  denote the restriction of  $v$  to  $S$ , i.e.  $v_S := v - \sum_{i \in [n] \setminus S} v_i e_i$ . By construction of the dictionary, there is a  $\Sigma$ -orthogonal basis for  $\{e_i : i \in S \cap \text{supp}(v)\}$ , so there are  $d_1, \dots, d_t \in \mathcal{D}$  and coefficients  $b_{d_1}, \dots, b_{d_t} \in \mathbb{R}$  with  $v_S = \sum_{i=1}^t b_{d_i} d_i$  and  $\langle d_i, d_j \rangle_\Sigma = 0$  for all  $i, j \in [t]$  with  $i \neq j$ . Note that  $\|v_S\|_\Sigma^2 = \sum_{i=1}^t b_{d_i}^2 \|d_i\|_\Sigma^2$ , so

$$\sum_{i=1}^t |b_{d_i}| \|d_i\|_\Sigma \leq \sqrt{t} \sqrt{\sum_{i=1}^t b_{d_i}^2 \|d_i\|_\Sigma^2} = \sqrt{t} \|v_S\|_\Sigma.$$

Now, we claim that the desired coefficient vector  $\{\alpha_d : d \in \mathcal{D}\}$  for  $v$  is defined by  $\alpha_d = b_d + \sum_{i \in [n] \setminus S} v_i \mathbb{1}[d = e_i]$ . We can check that  $\sum_{d \in \mathcal{D}} \alpha_d d = \sum_{i=1}^t b_{d_i} d_i + \sum_{i \in [n] \setminus S} v_i e_i = v$ . Also,

$$\begin{aligned} \|v_S\|_\Sigma &\leq \|v\|_\Sigma + \|v_{S^c}\|_\Sigma \\ &\leq \|v\|_\Sigma + \sqrt{\lambda_n} \|v_{S^c}\|_2 \\ &\leq (1 + 3\sqrt{\lambda_n/\lambda_{d+1}}) \|v\|_\Sigma \end{aligned}$$

by the guarantee of set  $S$ .

It follows that

$$\sum_{i=1}^t |b_{d_i}| \|d_i\|_\Sigma \leq (1 + 3\sqrt{\lambda_n/\lambda_{d+1}}) \sqrt{t} \|v\|_\Sigma \sqrt{\lambda_n/\lambda_{d+1}}.$$

Thus,

$$\begin{aligned} \sum_{d \in \mathcal{D}} |\alpha_d| \|d\|_\Sigma &\leq (1 + 3\sqrt{\lambda_n/\lambda_{d+1}}) \sqrt{t} \|v\|_\Sigma + \sum_{i \in [n] \setminus S} |v_i| \|e_i\|_\Sigma \\ &\leq (1 + 3\sqrt{\lambda_n/\lambda_{d+1}}) \sqrt{t} \|v\|_\Sigma + \sqrt{t} \|v_{S^c}\|_2 \sqrt{\lambda_n} \\ &\leq (1 + 3\sqrt{\lambda_n/\lambda_{d+1}}) \sqrt{t} \|v\|_\Sigma + 3\sqrt{t} \|v\|_\Sigma \sqrt{\lambda_n/\lambda_{d+1}} \\ &\leq 7\sqrt{t} \sqrt{\lambda_n/\lambda_{d+1}} \|v\|_\Sigma \end{aligned}$$

which completes the proof. ■

**Proof of Theorem 2.3.** Immediate from Lemma 2.9 and Lemma A.3. ■

## C An efficient algorithm for handling outlier eigenvalues

In this section we describe and provide error guarantees for a novel sparse linear regression algorithm BOAR-Lasso() (see Algorithm 2 for pseudocode), completing the proof of Theorem 1.1; in Section C.1 we then analyze a modified algorithm to prove Theorem 1.2.

The key subroutine of BOAR-Lasso() is the procedure AdaptivelyRegularizedLasso(), which (like the simplified procedure AdaptedBP() from Section 3) first invokes procedure IterativePeeling() to compute the set of coordinates that participate in sparse approximate dependencies, and second computes a modified Lasso estimate where those coordinates are not regularized.

We start with Theorem C.2, which shows that, in the setting where  $\Sigma$  has few outlier eigenvalues, the procedure AdaptivelyRegularizedLasso() estimates the sparse ground truth regressor at the “slow rate” (e.g. in the noiseless setting, the excess risk is at most  $O(\|v^*\|_\Sigma^2 r_{\text{eff}}/m)$ ). Typical excess risk analyses for Lasso proceed by applying some general-purpose machinery for generalization bounds, such as the following result which only requires understanding  $\langle w - w^*, X \rangle$  for  $X \sim N(0, \Sigma)$ .

---

**Algorithm 2:** Solve sparse linear regression when covariate eigenspectrum has few outliers

---

**Procedure** AdaptivelyRegularizedLasso( $\Sigma, (X_i, y_i)_{i=1}^m, t, d_l, \delta$ )

**Data:** Covariance matrix  $\Sigma : n \times n$ , samples  $(X_i, y_i)_{i=1}^m$ , sparsity  $t$ , small eigenvalue count  $d_l$ , failure probability  $\delta$

**Result:** Estimate  $\hat{v}$  of unknown sparse regressor, satisfying Theorem C.2

$\sum_{i=1}^n \lambda_i u_i u_i^\top \leftarrow$  eigendecomposition of  $\Sigma$

$S \leftarrow \text{IterativePeeling}(\Sigma, d_l, t)$

/\* See Algorithm 1 \*/

Return

$$\hat{v} \leftarrow \operatorname{argmin}_{v \in \mathbb{R}^n} \sum_{i=1}^m (\langle X_i, v \rangle - y_i)^2 + 8\lambda_{n-d_h} \log(12n/\delta) \|v_{S^c}\|_1^2 + 2\sqrt{2\lambda_{n-d_h} \log(12n/\delta)} \|v_{S^c}\|_1.$$

**Procedure** BOAR-Lasso( $\Sigma, (Y_i, y_i)_{i=1}^m, t, d_l, L, \delta$ )

**Data:** Covariance matrix  $\Sigma : n \times n$ , samples  $(X_i, y_i)_{i=1}^m$ , sparsity  $t$ , small eigenvalue count  $d_l$ , repetition count  $L$ , failure probability  $\delta$

**Result:** Estimate  $\hat{v}$  of unknown sparse regressor, satisfying Theorem C.3

$\hat{s}^{(0)} \leftarrow 0 \in \mathbb{R}^n$

**for**  $0 \leq j < L$  **do**

Set

$$\Sigma^{(j)} \leftarrow \begin{bmatrix} \Sigma & (\hat{s}^{(j)})^\top \Sigma \\ \Sigma \hat{s}^{(j)} & (\hat{s}^{(j)})^\top \Sigma \hat{s}^{(j)} \end{bmatrix}.$$

Set  $A^{(j)} := \{mj + 1, \dots, m(j + 1)\}$

$\hat{w}^{(j+1)} \leftarrow \text{AdaptivelyRegularizedLasso}(\Sigma^{(j)},$

$((X_i, \langle X_i, \hat{s}^{(j)} \rangle), y_i - \langle X_i, \hat{s}^{(j)} \rangle)_{i \in A^{(j)}}, t + 1, d_l + 1, \delta/L)$

$\hat{v}^{(j+1)} \leftarrow \hat{w}_{[n]}^{(j+1)} + \hat{w}_{n+1}^{(j+1)} \hat{s}^{(j)}$

$\hat{s}^{(j+1)} \leftarrow \hat{s}^{(j)} + \hat{v}^{(j+1)}$

**return**  $\hat{s}^{(L)}$

---

**Theorem C.1** (Theorem 1 in [45]). *Let  $n, m \in \mathbb{N}$  and  $\epsilon, \delta, \sigma > 0$ . Let  $\Sigma : n \times n$  be a positive semi-definite matrix and fix  $w^* \in \mathbb{R}^n$ . Let  $X : m \times n$  have i.i.d. rows  $X_1, \dots, X_m \sim N(0, \Sigma)$ , and let  $y = Xw^* + \xi$  where  $\xi \sim N(0, \sigma^2 I_m)$ . Let  $F : \mathbb{R}^d \rightarrow [0, \infty]$  be a continuous function such that*

$$\Pr_{x \sim N(0, \Sigma)} \left[ \sup_{w \in \mathbb{R}^n} \langle w - w^*, x \rangle - F(w) > 0 \right] \leq \delta.$$

*If  $m \geq 196\epsilon^{-2} \log(12/\delta)$ , then with probability at least  $1 - 4\delta$  it holds that for all  $w \in \mathbb{R}^d$ ,*

$$\|w - w^*\|_\Sigma^2 + \sigma^2 \leq \frac{1 + \epsilon}{m} (\|Xw - y\|_2 + F(w))^2.$$

662 In classical settings, e.g. (a) where  $\|v^*\|_1$  is bounded and  $\max_i \Sigma_{ii} \leq 1$  (see Proposition A.6) or (b)  
 663 where  $\Sigma$  satisfies the compatibility condition (see Definition G.1), the above result can be applied  
 664 together with the straightforward bound  $\langle v - v^*, X \rangle \leq \|v - v^*\|_1 \|X\|_\infty$ . To prove Theorem C.2  
 665 we follow the same general recipe as (a), with several modifications.

666 First, since  $\max_i \Sigma_{ii}$  could be arbitrarily large, we need to treat the (few) large eigenspaces of  $\Sigma$   
 667 separately when bounding  $\langle v - v^*, X \rangle$ . Similarly, since Theorem B.1 only gives bounds on  $v^*$   
 668 for coordinates outside  $S$ , we separately bound  $\langle (v - v^*)_{S^c}, X \rangle$  using that  $|S|$  is small. Second, to  
 669 achieve the optimal rate of  $\sigma^2 n_{\text{eff}}/m$  rather than  $\sigma^2 \sqrt{n_{\text{eff}}/m}$ , we do not directly apply Theorem C.1  
 670 to the noisy samples  $(X_i, y_i)$ ; instead, we derive a modification of that result (Lemma F.7) that only  
 671 invokes Theorem C.1 on the noiseless samples  $(X_i, \langle X_i, v^* \rangle)$ , and separately bounds the in-sample  
 672 prediction error  $\|\mathbb{X}(\hat{v} - v^*)\|_2$ . A similar technique is used in [45] for constrained least-squares  
 673 programs (see their Lemma 15); our Lemma F.7 applies to a broad family of additively regularized  
 674 programs, which obviates the need to independently estimate  $\|v^*\|_\Sigma$  but otherwise achieves  
 675 comparable bounds.

**Theorem C.2.** *Let  $n, t, d_l, d_h, m \in \mathbb{N}$  and  $\sigma, \delta > 0$ . Let  $\Sigma : n \times n$  be a positive semi-definite matrix with eigenvalues  $\lambda_1 \leq \dots \leq \lambda_n$ . Let  $(X_i, y_i)_{i=1}^m$  be independent samples where  $X_i \sim N(0, \Sigma)$  and*

$y_i = \langle X_i, v^* \rangle + \xi_i$ , for  $\xi_i \sim N(0, \sigma^2)$  and a fixed  $t$ -sparse vector  $v^* \in \mathbb{R}^n$ . Let  $\hat{v}$  be the output of **AdaptivelyRegularizedLasso** $(\Sigma, (X_i, y_i)_{i=1}^m, t, d_l, \delta)$ . Let  $n_{\text{eff}} := (7t)^{2t+1}d_l + d_h + \log(48/\delta)$  and let  $r_{\text{eff}} := t(\lambda_{n-d_h}/\lambda_{d_l+1})\log(12n/\delta)$ . There are absolute constants  $c, C > 0$  so that the following holds. If  $m \geq Cn_{\text{eff}}$ , then with probability at least  $1 - \delta$ ,

$$\|\hat{v} - v^*\|_{\Sigma}^2 \leq c \left( \frac{\sigma^2 n_{\text{eff}}}{m} + \frac{(\sigma + \|v^*\|_{\Sigma}) \|v^*\|_{\Sigma} \sqrt{r_{\text{eff}}}}{\sqrt{m}} + \frac{\|v^*\|_{\Sigma}^2 r_{\text{eff}}}{m} \right).$$

676 *Proof.* Define projection matrix  $P := \sum_{i=1}^{n-d_h} u_i u_i^{\top}$ , so that  $\text{rank}(P^{\perp}) = d_h$  and  $\lambda_{\max}(P\Sigma P) \leq$   
 677  $\lambda_{n-d_h}$ . For any  $v \in \mathbb{R}^n$  and  $X \sim N(0, \Sigma)$ , we can bound

$$\begin{aligned} \langle v - v^*, X \rangle &= \langle (v - v^*)_{S^c}, PX \rangle + \langle (v - v^*)_{S^c}, P^{\perp} X \rangle + \langle (v - v^*)_S, X \rangle \\ &= \langle (v - v^*)_{S^c}, PX \rangle + \langle \Sigma^{1/2}(v - v^*), \Sigma^{-1/2}(P^{\perp} X)_{S^c} \rangle + \langle \Sigma^{1/2}(v - v^*), \Sigma^{-1/2} X_S \rangle \\ &\leq \|(v - v^*)_{S^c}\|_1 \|PX\|_{\infty} + \left\| \Sigma^{1/2}(v - v^*) \right\|_2 (\|Z\|_2 + \|W\|_2) \end{aligned}$$

where  $PX \sim N(0, P\Sigma P)$ ,  $Z \sim N(0, \Sigma^{-1/2}(P^{\perp}\Sigma P^{\perp})_{S^c S^c} \Sigma^{-1/2})$ , and  $W \sim N(0, \Sigma^{-1/2}\Sigma_{SS} \Sigma^{-1/2})$ . First, since  $\max_i (P\Sigma P)_{ii} \leq \lambda_{\max}(P\Sigma P) \leq \lambda_{n-d_h}$ , we have the Gaussian tail bound

$$\Pr \left[ \|PX\|_{\infty} > \sqrt{\lambda_{n-d_h} \cdot 2 \log(12n/\delta)} \right] \leq \delta/12.$$

678 Second, since

$$\begin{aligned} \Sigma^{-1/2}(P^{\perp}\Sigma P^{\perp})_{S^c S^c} \Sigma^{-1/2} &\preceq \Sigma^{-1/2}(P^{\perp}\Sigma P^{\perp})\Sigma^{-1/2} && \text{(by Cauchy Interlacing Theorem)} \\ &= P^{\perp} && \text{(since } P^{\perp} \text{ commutes with } \Sigma) \end{aligned}$$

we have that  $\|Z\|_2^2$  is stochastically dominated by  $\chi_{d_h}^2$ , and thus

$$\Pr \left[ \|Z\|_2 > \sqrt{2d_h} \right] \leq e^{-m/4} \leq \delta/12.$$

Third, similarly, since  $\Sigma^{-1/2}\Sigma_{SS} \Sigma^{-1/2} \preceq I$  (again by Cauchy Interlacing Theorem) and also  $\text{rank}(\Sigma^{-1/2}\Sigma_{SS} \Sigma^{-1/2}) \leq |S|$ , we have that  $\|W\|_2^2$  is stochastically dominated by  $\chi_{|S|}^2$ , and thus

$$\Pr \left[ \|W\|_2 > \sqrt{2|S|} \right] \leq e^{-m/4} \leq \delta/12.$$

679 Combining the above bounds, we have that with probability at least  $1 - \delta/4$  over  $X \sim N(0, \Sigma)$ , for  
 680 all  $v \in \mathbb{R}^n$ ,

$$\langle v - v^*, X \rangle \leq \|(v - v^*)_{S^c}\|_1 \sqrt{\lambda_{n-d_h} \cdot 2 \log(12n/\delta)} + \left\| \Sigma^{1/2}(v - v^*) \right\|_2 (\sqrt{2d_h} + \sqrt{2|S|}).$$

We can therefore apply Lemma F.7 with covariance  $\Sigma$ , seminorm  $\Phi(v) := 2\sqrt{2\lambda_{n-d_h} \log(12n/\delta)} \|v_{S^c}\|_1$ ,  $p := 4(d_h + |S|)$ , ground truth  $v^*$ , samples  $(X_i, y_i)_{i=1}^m$ , and failure probability  $\delta/4$ . By the bound on  $|S|$  (Theorem B.1) we have  $|S| + d_h \leq (7t)^{2t+1}d_l + d_h \leq n_{\text{eff}}$ , so it holds that  $m \geq 16p + 196 \log(48/\delta)$ . Thus, with probability at least  $1 - 2\delta$ , we have

$$\|\hat{v} - v^*\|_{\Sigma}^2 \leq O \left( \frac{\sigma^2 n_{\text{eff}}}{m} + \frac{(\sigma + \|v^*\|_{\Sigma}) \|v^*\|_{\Sigma} \sqrt{\lambda_{n-d_h} \log(12n/\delta)}}{\sqrt{m}} + \frac{\|v^*\|_{\Sigma}^2 \lambda_{n-d_h} \log(12n/\delta)}{m} \right).$$

By the guarantee of  $S$  (Theorem B.1) and  $t$ -sparsity of  $v^*$ , we have  $\|v^*_{S^c}\|_2 \leq 3\lambda_{d_l+1}^{-1/2} \|v^*\|_{\Sigma}$ , and thus  $\|v^*_{S^c}\|_1 \leq 3\sqrt{t}\lambda_{d_l+1}^{-1/2} \|v^*\|_{\Sigma}$ . Substituting into the previous bound, we get

$$\|\hat{v} - v^*\|_{\Sigma}^2 \leq O \left( \frac{\sigma^2 n_{\text{eff}}}{m} + \frac{(\sigma + \|v^*\|_{\Sigma}) \|v^*\|_{\Sigma} \sqrt{r_{\text{eff}}}}{\sqrt{m}} + \frac{\|v^*\|_{\Sigma}^2 r_{\text{eff}}}{m} \right)$$

681 as claimed.  $\square$

The limitation of `AdaptivelyRegularizedLasso()` is that the excess risk bound depends on  $\|v^*\|_\Sigma^2$  rather than just  $\sigma^2$ . We next show that by a boosting approach, we can exponentially attenuate that dependence, essentially achieving the near-optimal rate of  $\sigma^2 n_{\text{eff}}/m$ . The key insight is that after producing an estimate  $\hat{v}$  of  $v^*$ , we can augment the set of covariates with the feature  $\langle \mathbb{X}, \hat{v} \rangle$ , and try to predict the response  $y - \langle \mathbb{X}, \hat{v} \rangle$ , which is now a  $(t+1)$ -sparse combination of the features. In standard settings, this is typically a bad idea because it introduces a sparse linear dependence. However, by the Cauchy Interlacing Theorem it increases the number of outlier eigenvalues by at most one – so our algorithms still apply. Thus, if we have enough samples that the excess risk bound in Theorem C.2 is non-trivially smaller than  $\|v^*\|_\Sigma^2$ , then we can iteratively achieve better and better estimates up to the noise limit. This is precisely what `BOAR-Lasso()` does; the precise guarantees are stated in the following theorem, which completes the proof of Theorem 1.1.

**Theorem C.3.** *Let  $n, t, d_l, d_h, m, L \in \mathbb{N}$  and  $\sigma, \delta > 0$ . Let  $\Sigma : n \times n$  be a positive semi-definite matrix with eigenvalues  $\lambda_1 \leq \dots \leq \lambda_n$ . Let  $(X_i, y_i)_{i=1}^m$  be independent samples where  $X_i \sim N(0, \Sigma)$  and  $y_i = \langle X_i, v^* \rangle + \xi_i$ , for  $\xi_i \sim N(0, \sigma^2)$  and a fixed  $t$ -sparse vector  $v^* \in \mathbb{R}^n$ .*

*Then, given  $\Sigma, (X_i, y_i)_{i=1}^m, t, d_l$ , and  $\delta$ , the algorithm `BOAR-Lasso()` outputs an estimator  $\hat{v}$  with the following properties.*

*Let  $n_{\text{eff}} := (7t)^{2t+1}d_l + d_h + \log(48/\delta)$  and let  $r_{\text{eff}} := t(\lambda_{n-d_h}/\lambda_{d_l+1})\log(12n/\delta)$ . There are absolute constants  $c_0, C_0 > 0$  such that the following holds. If  $m \geq C_0 L(n_{\text{eff}} + r_{\text{eff}})$ , then with probability at least  $1 - \delta$ , it holds that*

$$\|\hat{v} - v^*\|_\Sigma^2 \leq c_0 \frac{\sigma^2(n_{\text{eff}} + r_{\text{eff}})}{m/L} + 2^{-L} \cdot \|v^*\|_\Sigma^2.$$

*Moreover, `BOAR-Lasso()` has time complexity  $\text{poly}(n, m, t)$ .*

*Proof.* Let  $(A_0, \dots, A_{L-1})$  be a partition of  $[m]$  into  $L$  sets of size  $m/L$ . The idea of the algorithm is to compute vectors  $\hat{v}^{(1)}, \dots, \hat{v}^{(L)}$  where each  $\hat{v}^{(i)}$  is an estimate of  $v^* - \sum_{j=1}^{i-1} \hat{v}^{(j)}$ . Concretely, fix some  $0 \leq j \leq L-1$  and suppose that we have computed some vectors  $\hat{v}^{(1)}, \dots, \hat{v}^{(j)}$ . Set  $\hat{s}^{(j)} := \hat{v}^{(1)} + \dots + \hat{v}^{(j)}$ . Define a matrix  $\Sigma^{(j)} : (n+1) \times (n+1)$  by

$$\Sigma^{(j)} := \begin{bmatrix} \Sigma & (\hat{s}^{(j)})^\top \Sigma \\ \Sigma \hat{s}^{(j)} & (\hat{s}^{(j)})^\top \Sigma (\hat{s}^{(j)}) \end{bmatrix}.$$

Thus, for example,  $\Sigma^{(0)}$  has zeroes in the last row and last column. Now for each  $i \in A_j$ , define  $(X_i^{(j)}, y_i^{(j)})$  by

$$\begin{aligned} X_i^{(j)} &:= (X_i, \langle X_i, \hat{s}^{(j)} \rangle) \\ y_i^{(j)} &:= y_i - \langle X_i, \hat{s}^{(j)} \rangle. \end{aligned}$$

By construction, the  $m/L$  samples  $(X_i^{(j)}, y_i^{(j)})_{i \in A_j}$  are independent and distributed as  $X_i^{(j)} \sim N(0, \Sigma^{(j)})$  and  $y_i^{(j)} = \langle X_i^{(j)}, (v^*, -1) \rangle + \xi_i$ . Let  $\lambda_1^{(j)} \leq \dots \leq \lambda_{n+1}^{(j)}$  be the eigenvalues of  $\Sigma^{(j)}$ .

Now we apply Theorem C.2 with covariance  $\Sigma^{(j)}$ , samples  $(X_i^{(j)}, y_i^{(j)})_{i \in A_j}$ , sparsity  $t+1$ , outlier counts  $d_l+1$  and  $d_h+1$ , and failure probability  $\delta/L$ ; let  $n_{\text{eff}}^{(j)}$  and  $r_{\text{eff}}^{(j)}$  be the induced parameters defined in that theorem statement, and let  $c, C$  be the constants. By the Cauchy Interlacing Theorem, we have  $\lambda_{d_l+2}^{(j)} \geq \lambda_{d_l+1}$  and similarly  $\lambda_{n+1-(d_h+1)}^{(j)} \leq \lambda_{n-d_h}$ . Thus  $r_{\text{eff}}^{(j)} \leq 2r_{\text{eff}}$ . Also  $n_{\text{eff}}^{(j)} \leq n_{\text{eff}}$ .

Thus, if the constant  $C_0$  is chosen appropriately large, then  $m/L \geq 16cr_{\text{eff}}^{(j)}$  and also  $m/L \geq Cn_{\text{eff}}^{(j)}$ . Hence (by the error guarantee of Theorem C.2) with probability at least  $1 - \delta/L$  we obtain a vector  $\hat{w}^{(j+1)}$  such that

$$\begin{aligned} \|\hat{w}^{(j+1)} - (v^*, -1)\|_{\Sigma^{(j)}}^2 &\leq \frac{c\sigma^2 n_{\text{eff}}^{(j)}}{m/L} + c\|(v^*, -1)\|_{\Sigma^{(j)}}^2 \sqrt{\frac{r_{\text{eff}}^{(j)}}{m/L}} + c\sigma\|(v^*, -1)\|_{\Sigma^{(j)}} \sqrt{\frac{r_{\text{eff}}^{(j)}}{m/L}} \\ &\leq \frac{2c\sigma^2 n_{\text{eff}}}{m/L} + \frac{\|(v^*, -1)\|_{\Sigma^{(j)}}^2}{4} + \left( \frac{\|(v^*, -1)\|_{\Sigma^{(j)}}^2}{4} + \frac{4c^2\sigma^2 r_{\text{eff}}}{m/L} \right) \end{aligned}$$

$$\leq \frac{c_0}{2} \frac{\sigma^2(n_{\text{eff}} + r_{\text{eff}})}{m/L} + \frac{\|(v^*, -1)\|_{\Sigma^{(j)}}^2}{2} \quad (5)$$

where the second inequality uses AM-GM to bound the third term, and the third inequality is by choosing  $c_0 \geq 4c + 8c^2$ .

But now define  $\hat{v}^{(j+1)} := \hat{w}_{[n]}^{(j+1)} + \hat{w}_{n+1}^{(j+1)} \hat{s}^{(j)}$ . Then we observe that  $\|(v^*, -1)\|_{\Sigma^{(j)}}^2 = \|v^* - \hat{s}^{(j)}\|_{\Sigma}^2$  and  $\|\hat{w}^{(j+1)} - (v^*, -1)\|_{\Sigma^{(j)}}^2 = \|\hat{v}^{(j+1)} - (v^* - \hat{s}^{(j)})\|_{\Sigma}^2 = \|v^* - \hat{s}^{(j+1)}\|_{\Sigma}^2$  where  $\hat{s}^{(j+1)} = \hat{v}^{(1)} + \dots + \hat{v}^{(j+1)}$ . So (5) is equivalent to

$$\|v^* - \hat{s}^{(j+1)}\|_{\Sigma}^2 \leq \frac{c_0}{2} \frac{\sigma^2(n_{\text{eff}} + r_{\text{eff}})}{m/L} + \frac{1}{2} \|v^* - \hat{s}^{(j)}\|_{\Sigma}^2.$$

Inductively, we conclude that

$$\|v^* - \hat{s}^{(L)}\|_{\Sigma}^2 \leq c_0 \frac{\sigma^2(n_{\text{eff}} + r_{\text{eff}})}{m/L} + 2^{-L} \|v^*\|_{\Sigma}^2$$

as desired. The time complexity (see Algorithm 2 for full pseudocode) is dominated by  $L$  eigen-decompositions of  $n \times n$  Hermitian matrices (each of which takes time  $O(n^3)$  by e.g. the QR algorithm), as well as  $L$  convex optimizations (each of which takes time  $\tilde{O}(n^3)$  to solve to inverse-polynomial accuracy [26], which is sufficient for the correctness proof).  $\square$

#### 714 C.1 An alternative algorithm (proof of Theorem 1.2)

In this section we prove Theorem 1.2, which essentially states that the sample complexity dependence on  $d_l$  in BOAR-Lasso() can be removed at the cost of a time complexity depending on  $d_l^t$ . See Algorithm 3 for the pseudocode of how we modify AdaptivelyRegularizedLasso(): essentially, we brute force search over all size- $t$  subsets of the set  $S$  produced by IterativePeeling(), construct an appropriate dictionary for each of these  $\binom{|S|}{t}$  subsets, and then perform a final model selection step (with fresh samples) to pick the best dictionary/estimator. The boosting step is exactly identical to that in BOAR-Lasso().

**Lemma C.4.** *Let  $n, t, d \in \mathbb{N}$ . Let  $\Sigma : n \times n$  be a positive semi-definite matrix with eigenvalues  $\lambda_1 \leq \dots \leq \lambda_n$ . Then there is a family  $\mathcal{D} \subseteq \mathbb{R}^{n \times (n+t)}$  of size  $|\mathcal{D}| \leq (7t)^{2t^2+t} (2d)^t$ , consisting entirely of  $n \times (n+t)$  matrices with the form*

$$D := [I_n \quad d_1 \quad \dots \quad d_t],$$

with the following property. For any  $t$ -sparse  $v \in \mathbb{R}^n$ , there is some  $D \in \mathcal{D}$  and  $w \in \mathbb{R}^{n+k}$  with  $v = Dw$  and

$$\|w\|_1 \leq \frac{7t^{1/2}}{\sqrt{\lambda_{d+1}}} \sqrt{v^\top \Sigma v}.$$

*Proof.* Let  $u_1, \dots, u_n \in \mathbb{R}^n$  be the eigenvectors of  $\Sigma$  corresponding to eigenvalues  $\lambda_1, \dots, \lambda_n$  respectively, so that  $\Sigma = \sum_{i=1}^n \lambda_i u_i u_i^\top$ . Define  $\bar{\Sigma} := \lambda_{d+1}^{-1} \sum_{i=1}^n \min(\lambda_i, \lambda_{d+1}) u_i u_i^\top$ . Let  $S$  be the output of IterativePeeling( $\Sigma, d_l, t$ ), and let  $\mathcal{D} := \{D(T) : T \in \binom{S}{t}\}$ , where for any  $T \in \binom{S}{t}$ , we let  $\{d_1, \dots, d_t\}$  be a  $\bar{\Sigma}$ -orthonormal basis for  $\text{span}\{e_i : i \in T\}$ , and let  $D(T)$  be the  $n \times (n+t)$  matrix with columns  $e_1, \dots, e_n, d_1, \dots, d_t$ . The bound on  $|\mathcal{D}|$  follows from Theorem B.1.

For any  $t$ -sparse  $v \in \mathbb{R}^n$ , pick the matrix  $D \in \mathcal{D}$  indexed by any  $T \in \binom{S}{t}$  with  $S \cap \text{supp}(v) \subseteq T$ . Let  $d_1, \dots, d_t \in \mathbb{R}^n$  be the last  $t$  columns of  $D$ . Then there are coefficients  $b_1, \dots, b_t$  so that we can write  $v_S = \sum_{i=1}^t b_i d_i$ . Since  $d_i^\top \bar{\Sigma} d_{i'} = \mathbb{1}[i = i']$  for all  $i, i' \in [t]$ , we have  $v_S^\top \bar{\Sigma} v_S = \sum_{i=1}^t b_i^2$ .

Hence,  $\|b\|_1 \leq \sqrt{t} \sqrt{v_S^\top \bar{\Sigma} v_S}$ . But we can bound

$$\begin{aligned} \sqrt{v_S^\top \bar{\Sigma} v_S} &= \|\bar{\Sigma}^{1/2} v_S\|_2 \\ &\leq \|\bar{\Sigma}^{1/2} v\|_2 + \|\bar{\Sigma}^{1/2} v_{S^c}\|_2 \end{aligned} \quad (\text{by triangle inequality})$$

---

**Algorithm 3:** Alternative algorithm to solve sparse linear regression when covariate eigenspectrum has few outliers

---

**Procedure** AugmentedDictionaryLasso( $\Sigma, (X_i, y_i)_{i=1}^m, t, d_l, \delta$ )

**Data:** Covariance matrix  $\Sigma : n \times n$ , samples  $(X_i, y_i)_{i=1}^m$ , sparsity  $t$ , small eigenvalue count  $d_l$ , failure probability  $\delta$

**Result:** Estimate  $\hat{v}$  of unknown sparse regressor, satisfying Theorem C.5

$\sum_{i=1}^n \lambda_i u_i u_i^\top \leftarrow$  eigendecomposition of  $\Sigma$

$S \leftarrow \text{IterativePeeling}(\Sigma, d_l, t)$

/\* See Algorithm 1 \*/

$\bar{\Sigma} \leftarrow \lambda_{d_l+1}^{-1} \sum_{i=1}^n \min(\lambda_i, \lambda_{d_l+1}) u_i u_i^\top$

**for**  $T \in \binom{S}{[t]}$  **do**

$d_1^{(T)}, \dots, d_t^{(T)} \leftarrow \bar{\Sigma}$ -orthogonal basis for  $\text{span}\{e_i : i \in T\}$

$D(T) \leftarrow \begin{bmatrix} I_n & d_1^{(T)} & \dots & d_t^{(T)} \end{bmatrix}$

Compute

$$\hat{w}(T) \leftarrow \underset{w \in \mathbb{R}^{n+t}}{\text{argmin}} \left[ \sum_{i=1}^{m/2} (\langle X_i, D(T)w \rangle - y_{1:m/2})^2 + 8\lambda_{n-d} \log(8n/\delta) \|w\|_1^2 + 2\sqrt{2\lambda_{n-d} \log(8n/\delta)} \|y_{1:m/2}\|_2 \|w\|_1 \right]$$

Select best hypothesis

$$\hat{T} \leftarrow \underset{T \in \binom{S}{[t]}}{\text{argmin}} \sum_{i=m/2+1}^m (\langle X_i, D(T)\hat{w}(T) \rangle - y_i)^2$$

**return**  $D(\hat{T})\hat{w}(\hat{T})$

---

$$\leq \lambda_{d+1}^{-1/2} \left\| \Sigma^{1/2} v \right\|_2 + \|v_{S^c}\|_2 \quad (\text{by } \bar{\Sigma} \preceq \lambda_{d+1}^{-1} \Sigma \text{ and } \bar{\Sigma} \preceq I_n)$$

$$\leq \lambda_{d+1}^{-1/2} \left\| \Sigma^{1/2} v \right\|_2 + 3\lambda_{d+1}^{-1/2} \sqrt{v^\top \Sigma v} \quad (\text{by Theorem B.1 and } t\text{-sparsity of } v)$$

$$\leq 4\lambda_{d+1}^{-1/2} \sqrt{v^\top \Sigma v}.$$

We conclude that  $\|b\|_1 \leq 4\sqrt{t}\lambda_{d+1}^{-1/2} \sqrt{v^\top \Sigma v}$ . Thus, if we define

$$w := \sum_{i \in [n] \setminus S} v_i e_i + \sum_{i=1}^t b_i e_{n+i},$$

where here  $e_1, \dots, e_{n+k}$  refer to the standard basis vectors in  $\mathbb{R}^{n+t}$ , then we have  $Dw = v_{[n] \setminus S} + \sum_{i=1}^t b_i d_i = v$ , and also

$$\|w\|_1 \leq \|b\|_1 + \sum_{i \in [n] \setminus S} |v_i| \leq 4\sqrt{t}\lambda_{d+1}^{-1/2} \sqrt{v^\top \Sigma v} + \sqrt{t} \|v_{S^c}\|_2 \leq \frac{7\sqrt{t}}{\lambda_{d+1}^{1/2}} \sqrt{v^\top \Sigma v}$$

731 as desired. □

732 **Theorem C.5.** Let  $n, t, d_l, d_h, m \in \mathbb{N}$  and let  $\Sigma : n \times n$  be a positive semi-definite matrix with  
 733 eigenvalues  $\lambda_1 \leq \dots \leq \lambda_n$ . Let  $(X_i, y_i)_{i=1}^m$  be independent samples where  $X_i \sim N(0, \Sigma)$  and  
 734  $y_i = \langle X_i, v^* \rangle + \xi_i$ , for  $\xi_i \sim N(0, \sigma^2)$  and a fixed  $t$ -sparse vector  $v^* \in \mathbb{R}^n$ . Set  $k := t(7t)^{2t^2+t} d_l^t$   
 735 and let  $\mathcal{D}$  be the family of matrices (of size at most  $k$ ) guaranteed by Lemma C.4.

736 Let  $\delta > 0$ . For every  $D \in \mathcal{D}$ , define

$$\hat{w}(D) \in \underset{w \in \mathbb{R}^{n+t}}{\text{argmin}} \left\| \mathbb{X}^{(1)} Dw - y_{1:m/2} \right\|_2^2 + 8\lambda_{n-d} \log(8n/\delta) \|w\|_1^2 + 2\sqrt{2\lambda_{n-d} \log(8n/\delta)} \|y_{1:m/2}\|_2 \|w\|_1 \quad (6)$$



where  $\mathbb{X}^{(1)} : (m/2) \times n$  is the matrix with rows  $X_1, \dots, X_{m/2}$ , and define  $\hat{v} = \hat{D}\hat{w}(\hat{D})$  where

$$\hat{D} \in \operatorname{argmin}_{D \in \mathcal{D}} \left\| \mathbb{X}^{(2)} D \hat{w}(D) - y_{m/2+1:m} \right\|_2^2$$

737 where  $\mathbb{X}^{(2)} : (m/2) \times n$  is the matrix with rows  $X_{m/2+1}, \dots, X_m$ .

Let  $n_{\text{eff}} := t^2 \log(t) + t \log(d_l) + d_h + \log(48/\delta)$  and let  $r_{\text{eff}} := t(\lambda_{n-d_h}/\lambda_{d_l+1}) \log(8n/\delta)$ . There are absolute constants  $c, C > 0$  so that the following holds. If  $m \geq Cn_{\text{eff}}$ , then with probability at least  $1 - 3\delta$  it holds that

$$\|\hat{v} - v^*\|_\Sigma^2 \leq c \left( \frac{\sigma^2 n_{\text{eff}}}{m} + \|v^*\|_\Sigma^2 \left( \frac{r_{\text{eff}}}{m} + \sqrt{\frac{r_{\text{eff}}}{m}} \right) + \sigma \|v^*\|_\Sigma \sqrt{\frac{r_{\text{eff}}}{m}} \right).$$

738 Let  $D^* \in \mathcal{D}$  and  $w^* \in \mathbb{R}^{n+t}$  be the matrix and vector guaranteed by Lemma C.4 for the  $t$ -sparse  
739 vector  $v^*$ . Let  $\Gamma = (D^*)^\top \Sigma D^*$  with eigenvalues  $\gamma_1 \leq \dots \leq \gamma_{n+t}$ . We make the following claim:

**Claim C.6.** With probability at least  $1 - \delta/4$  over  $G \sim N(0, \Gamma)$ , it holds uniformly in  $w \in \mathbb{R}^{n+t}$  that

$$\langle w - w^*, G \rangle \leq \|w - w^*\|_1 \sqrt{\lambda_{n-d_h} \cdot 2 \log(8n/\delta)} + \|w - w^*\|_\Gamma \sqrt{2(d_h + t)}.$$

740 *Proof.* Since  $\Sigma$  is a principal submatrix of  $\Gamma$ , we have  $\gamma_{n-d_h} \leq \lambda_{n-d_h}$  (by the Cauchy Interlacing  
741 Theorem). Suppose that  $\Gamma$  has eigendecomposition  $\Gamma = \sum_{i=1}^{n+t} \gamma_i g_i g_i^\top$ , and define projection matrix  
742  $P : (n+t) \times (n+t)$  by  $P := \sum_{i=1}^{n-d_h} g_i g_i^\top$ , so that  $\text{rank}(P^\perp) = d_h + t$  and  $\lambda_{\max}(P\Gamma P) \leq$   
743  $\gamma_{n-d_h} \leq \lambda_{n-d_h}$ . Then for any  $w \in \mathbb{R}^{n+t}$  and  $G \sim N(0, \Gamma)$ , we can bound

$$\begin{aligned} \langle w - w^*, G \rangle &= \langle w - w^*, PG \rangle + \langle w - w^*, P^\perp G \rangle \\ &\leq \|w - w^*\|_1 \|PG\|_\infty + \langle \Gamma^{1/2}(w - w^*), \Gamma^{-1/2} P^\perp G \rangle \\ &= \|w - w^*\|_1 \|PG\|_\infty + \langle \Gamma^{1/2}(w - w^*), P^\perp \Gamma^{-1/2} G \rangle \\ &\leq \|w - w^*\|_1 \|PG\|_\infty + \left\| \Gamma^{1/2}(w - w^*) \right\|_2 \|Z\|_2 \end{aligned}$$

where  $Z \sim N(0, P^\perp)$ . The second equality above uses that  $\Gamma^{-1/2}$  and  $P^\perp$  are simultaneously diagonalizable (and therefore commute). But now for any  $\delta > 0$ , we have the Gaussian tail bounds

$$\Pr \left[ \|PG\|_\infty > \sqrt{\max_i (P\Gamma P)_{ii} \cdot 2 \log(8n/\delta)} \right] \leq \delta/8$$

and

$$\Pr \left[ \|Z\|_2 > \sqrt{2 \text{rank}(P^\perp)} \right] \leq e^{-m/8} \leq \delta/8.$$

744 Thus, with probability at least  $1 - \delta/4$  over  $G \sim N(0, \Gamma)$ , for any  $w \in \mathbb{R}^{n+t}$ , we have

$$\begin{aligned} \langle w - w^*, G \rangle &\leq \|w - w^*\|_1 \sqrt{\max_i (P\Gamma P)_{ii} \cdot 2 \log(8n/\delta)} + \left\| \Gamma^{1/2}(w - w^*) \right\|_2 \sqrt{2 \text{rank}(P^\perp)} \\ &\leq \|w - w^*\|_1 \sqrt{\lambda_{n-d_h} \cdot 2 \log(8n/\delta)} + \left\| \Gamma^{1/2}(w - w^*) \right\|_2 \sqrt{2(d_h + t)} = F(w) \end{aligned}$$

745 which proves the claim.  $\square$

746 We now proceed with proving the theorem.

**Proof of Theorem C.5.** Applying Claim C.6, we can now invoke Lemma F.7 with covariance matrix  $\Gamma$ , seminorm  $\Phi(v) := 2\sqrt{2\lambda_{n-d_h} \cdot \log(8n/\delta)} \|v\|_1$ ,  $p := 2(d_h + t)$ , ground truth  $w^*$ , samples  $((D^*)^\top X_i, y_i)_{i=1}^{m/2}$ , and failure probability  $\delta/4$ . Since we chose  $m$  sufficiently large that  $m/2 \geq 16p + 196 \log(12/\delta)$ , we conclude that with probability at least  $1 - 2\delta$  over the randomness of  $(X_i, y_i)_{i=1}^{m/2}$ , it holds that

$$\|\hat{w}(D^*) - w^*\|_\Gamma^2 \leq O \left( \frac{\sigma^2(d_h + t)}{m} + \frac{(\sigma + \|w^*\|_\Gamma) \|w^*\|_1 \sqrt{\lambda_{n-d_h} \cdot \log(8n/\delta)}}{\sqrt{m}} + \frac{\|w^*\|_1^2 \lambda_{n-d_h} \log(8n/\delta)}{m} \right).$$

Since  $v^* = D^* w^*$  and  $\|w^*\|_1 \leq 7t^{1/2} \lambda_{d_l+1}^{-1/2} \|v^*\|_\Sigma$  (the guarantees of Lemma C.4), it follows that

$$\|D^* \hat{w}(D^*) - v^*\|_\Sigma^2 \leq O \left( \frac{\sigma^2(d_h + t)}{m} + \frac{(\sigma + \|v^*\|_\Sigma) \|v^*\|_\Sigma \sqrt{r_{\text{eff}}}}{\sqrt{m}} + \frac{\|v^*\|_\Sigma^2 r_{\text{eff}}}{m} \right).$$

To complete the proof of the theorem, condition on any values of  $(X_i, y_i)_{i=1}^{m/2}$  for which the above bound holds. By applying Lemma F.2 with covariance matrix  $\Sigma$ , hypothesis set  $\mathcal{W} := \{D\hat{w}(D) : D \in \mathcal{D}\}$ , and samples  $(X_i, y_i)_{i=m/2+1}^m$  (which are independent of  $\mathcal{W}$ ), since  $m/2 \geq 32 \log(2|\mathcal{D}|/\delta)$ , we have with probability at least  $1 - 2\delta$  over the samples  $(X_i, y_i)_{i=m/2+1}^m$  that

$$\|\hat{D}\hat{w}(\hat{D}) - v^*\|_\Sigma^2 \leq 6 \min_{D \in \mathcal{D}} \|D\hat{w}(D) - v^*\|_\Sigma^2 + \frac{32\sigma^2 \log(2|\mathcal{D}|/\delta)}{m}.$$

Hence, with probability at least  $1 - 5\delta$  we have

$$\|\hat{D}\hat{w}(\hat{D}) - v^*\|_\Sigma^2 \leq O \left( \frac{\sigma^2(d_h + t + \log(2|\mathcal{D}|/\delta))}{m} + \frac{(\sigma + \|v^*\|_\Sigma) \|v^*\|_\Sigma \sqrt{r_{\text{eff}}}}{\sqrt{m}} + \frac{\|v^*\|_\Sigma^2 r_{\text{eff}}}{m} \right)$$

747 which proves the theorem. ■

748 We can use the above theorem (together with the previously discussed boosting approach) to get the  
749 following result, which proves Theorem 1.2.

750 **Theorem C.7.** *Let  $n, t, d_l, d_h, m, L \in \mathbb{N}$  and  $\sigma, \delta > 0$ . Let  $\Sigma : n \times n$  be a positive semi-definite  
751 matrix with eigenvalues  $\lambda_1 \leq \dots \leq \lambda_n$ . Let  $(X_i, y_i)_{i=1}^m$  be independent samples where  $X_i \sim$   
752  $N(0, \Sigma)$  and  $y_i = \langle X_i, v^* \rangle + \xi_i$ , for  $\xi_i \sim N(0, \sigma^2)$  and a fixed  $t$ -sparse vector  $v^* \in \mathbb{R}^n$ .*

753 *Then, given  $\Sigma, (X_i, y_i)_{i=1}^m, t, d_l$ , and  $\delta$ , there is an estimator  $\hat{v}$  with the following properties.*

*Let  $n'_{\text{eff}} := t^2 \log(t) + t \log(d_l) + d_h + \log(48L/\delta)$  and let  $r'_{\text{eff}} := t(\lambda_{n-d_h}/\lambda_{d_l+1}) \log(8nL/\delta)$ .  
There are absolute constants  $c_0, C_0 > 0$  such that the following holds. If  $m \geq C_0 L(n'_{\text{eff}} + r'_{\text{eff}})$ , then  
with probability at least  $1 - \delta$ , it holds that*

$$\|\hat{v} - v^*\|_\Sigma^2 \leq c_0 \frac{\sigma^2(n'_{\text{eff}} + r'_{\text{eff}})}{m/L} + 2^{-L} \cdot \|v^*\|_\Sigma^2.$$

754 *Moreover,  $\hat{v}$  is computable in time  $(t+1)^{O(t^2)}(d_l+1)^{t+1} \cdot \text{poly}(n)$ .*

755 *Proof.* Identical to that of Theorem C.3, except using Theorem C.5 instead of Theorem C.2. □

## 756 D Faster sparse linear regression for arbitrary $\Sigma$

757 In this section we prove Theorem 3.1. The approach is via feature adaptation: in Theorem D.5, we  
758 show that any covariance matrix  $\Sigma$  has a  $(t, O(t^{3/2} \log n)$ - $\ell_1$ -representation of size  $O(n^{t-1/2})$  that  
759 is computable in time  $n^{t-\Omega(1/t)} \log^{O(t)} n$ , using  $O(t \log n)$  samples from  $N(0, \Sigma)$ . The algorithm  
760 for computing this representation is described in Algorithm 4. One of the key tools is the following  
761 result from computational geometry:

762 **Theorem D.1** ([30]). *Let  $n, d, k \in \mathbb{N}$  and  $\delta > 0$ . Given points  $p_1, \dots, p_n \in \mathbb{R}^d$ , query dimen-  
763 sion  $k$ , and failure probability  $\delta$ , there an algorithm  $\text{DS}((p_1, \dots, p_n), k, \delta)$  with time complexity  
764  $n^{k+1} (\log n)^{O(k)} \text{poly}(d) \log(1/\delta)$ , that constructs a data structure  $\mathcal{N}$  that answers queries of the  
765 following form. Given a  $k$ -dimensional subspace  $F \subseteq \mathbb{R}^d$ , the output  $\mathcal{N}(F)$  is some  $i^* \in [n]$ . With  
766 probability at least  $1 - \delta$ , the query time complexity is  $n^{1-1/(2k)} \text{poly}(d) \log(1/\delta)$ , and it holds that*

$$\min_{q \in F} \|p_{i^*} - q\|_2 \leq O(\log n) \cdot \min_{i \in [n]} \min_{q \in F} \|p_i - q\|_2.$$

767 How do we use the above theorem to efficiently construct the  $\ell_1$ -representation? The intuition is as  
768 follows. Let  $\mathbb{X}$  be the  $m \times n$  matrix where each row is a sample from  $N(0, \Sigma)$ . Then each column  
769 is a vector  $p_i$  representing a particular covariate. To find the  $\ell_1$ -representation, it essentially suffices

---

**Algorithm 4:**  $\ell_1$ -representation for arbitrary  $\Sigma$ 


---

```

1 Procedure FindOrthonormalization( $p_1, \dots, p_t$ )
   Data: Nonzero vectors  $p_1, \dots, p_t \in \mathbb{R}^m$ 
   Result:  $\alpha^{(1)}, \dots, \alpha^{(t)} \in \mathbb{R}^t$  such that  $\text{span}\{\alpha^{(1)}, \dots, \alpha^{(t)}\} = \text{span}\{e_1, \dots, e_t\}$  and
            $\langle \sum_{\ell} \alpha_{\ell}^{(i)} p_{\ell}, \sum_{\ell} \alpha_{\ell}^{(j)} p_{\ell} \rangle = 0$  for all  $i \neq j$ 
2
3   for  $i = 1, \dots, t$  do
4      $\alpha^{(i)} \leftarrow e_i / \|p_i\|_2 \in \mathbb{R}^k$ 
5     for  $j = 1, \dots, i-1$  do
6       if  $\sum_{\ell} \alpha_{\ell}^{(j)} p_{\ell} \neq 0$  then
7          $\alpha^{(i)} \leftarrow \alpha^{(i)} - \frac{\langle \sum_{\ell} \alpha_{\ell}^{(i)} p_{\ell}, \sum_{\ell} \alpha_{\ell}^{(j)} p_{\ell} \rangle}{\|\sum_{\ell} \alpha_{\ell}^{(j)} p_{\ell}\|_2} \alpha^{(j)}$ 
8   return  $\alpha^{(1)}, \dots, \alpha^{(k)}$ 
9 Procedure RepresentVectors( $\{p_1, \dots, p_n\}, t, \delta$ )
   Data: Unit vectors  $p_1, \dots, p_n \in \mathbb{R}^m$ , sparsity parameter  $t$ , failure probability  $\delta$ 
   Result: Set  $\mathcal{D} \subseteq \mathbb{R}^n$  of size  $O(n^{t-1/2})$ , where all elements  $d \in \mathcal{D}$  are  $t$ -sparse (and
           represented succinctly)
10
11   Compute partition  $I_1 \sqcup \dots \sqcup I_{\sqrt{n}} = [n]$  where  $|I_i| \leq \lceil \sqrt{n} \rceil$  for all  $i$ 
12   Initialize  $\mathcal{D} \leftarrow \emptyset$ 
13   for  $j = 1, \dots, \sqrt{n}$  do
14     Construct data structure  $\mathcal{N}^j \leftarrow \text{DS}((p_i : i \in I_j), t-1, \delta/n^t)$  /* Theorem D.1 */
15     for  $T \subseteq \binom{[n]}{t-1}$  do
16        $h(T, j) \leftarrow \mathcal{N}^j(\text{span}\{p_i : i \in T\})$  /* Theorem D.1 */
17       Find  $\gamma \in \mathbb{R}^T$  such that  $\sum_{i \in T} \gamma_i p_i = \text{Proj}_{\text{span}\{p_i : i \in T\}} p_{h(T, j)}$ 
18       Write  $\gamma$  as a sparse vector in  $\mathbb{R}^n$  (supported on  $T$ )
19       Add  $\gamma - e_{h(T, j)}$  to  $\mathcal{D}$ 
20     for  $T \subseteq \binom{[n]}{t-2}$  do
21       for  $a, b \in I_j$  do
22          $\gamma^{(1)}, \dots, \gamma^{(t)} \leftarrow \text{FindOrthonormalization}((p_i : i \in T \cup \{a, b\}))$ 
23         Write  $\gamma^{(1)}, \dots, \gamma^{(t)}$  as sparse vectors in  $\mathbb{R}^n$  (supported on  $T \cup \{a, b\}$ )
24         Add  $\gamma^{(1)}, \dots, \gamma^{(t)}$  to  $\mathcal{D}$ 
25   return  $\mathcal{D}$ 
26 Procedure ComputeL1Representation( $\{X_1, \dots, X_m\}, t$ )
27   Let  $\mathbb{X} : m \times n$  be the matrix with rows  $X_1, \dots, X_m$ 
28   Let  $q_1, \dots, q_n$  be the columns of  $\mathbb{X}$ , and let  $p_i := q_i / \|q_i\|_2$  for  $i \in [n]$ 
29    $\tilde{\mathcal{D}} \leftarrow \text{RepresentVectors}(\{p_1, \dots, p_n\}, t, e^{-m})$ 
30    $\hat{D} \leftarrow \text{diag}(\|q_1\|_2, \dots, \|q_n\|_2)$ 
31    $\mathcal{D} \leftarrow \{\hat{D}d : d \in \tilde{\mathcal{D}}\}$ 
32   return  $\mathcal{D}$ 

```

---

770 to find a dictionary  $\mathcal{D}$  of  $O(n^{t-1/2})$  sparse combinations of  $\{p_1, \dots, p_n\}$  so that every  $t$ -sparse  
 771 combination of  $\{p_1, \dots, p_n\}$  can be written in terms of the chosen combinations, with a coefficient  
 772 vector that has bounded  $\ell_1$  norm.

773 For notational ease, we define  $C(x)$  to be the “cost” of a particular linear combination  $x \in \mathbb{R}^n$  with  
 774 respect to the set  $\mathcal{D}$  of chosen combinations:

775 **Definition D.2.** For a subset  $\mathcal{D} \subseteq \mathbb{R}^n$ , define  $C_{\mathcal{D}} : \mathbb{R}^n \rightarrow [0, \infty]$  by

$$C_{\mathcal{D}}(x) := \min_{\alpha \in \mathbb{R}^{\mathcal{D}} : \sum_{d \in \mathcal{D}} \alpha_d d = x} \sum_{d \in \mathcal{D}} |\alpha_d| \cdot \left\| \sum_{i=1}^n d_i p_i \right\|_2.$$

776 With this notation, we want to construct a set  $\mathcal{D}$  of size  $O(n^{t-1/2})$ , consisting of  $t$ -sparse vectors,  
 777 such that

$$C_{\mathcal{D}}(x) \leq \text{poly}(t, \log n) \cdot \left\| \sum x_i p_i \right\|_2$$

778 for all  $t$ -sparse  $x \in \mathbb{R}^n$ .

779 The construction is quite simple: divide the set  $\{p_1, \dots, p_n\}$  into  $\sqrt{n}$  equal-sized groups. For each  
 780 set  $T$  of  $t-1$  vectors and each of the  $\sqrt{n}$  groups, find the closest vector in the group to the subspace  
 781 spanned by  $T$  (using Theorem D.1 to achieve sublinear time complexity). Then add the difference  
 782 between the vector and its projection (onto the subspace) to the dictionary. Finally, for each set of  $t$   
 783 vectors where two of the vectors lie in the same group, add an orthonormal basis for those vectors  
 784 to the dictionary. See the procedure `RepresentVectors()` in Algorithm 5 for pseudocode.

785 By construction, the dictionary clearly has size  $O(n^{t-1/2})$ . At a high level, the reason it satisfies the  
 786 representational property is the following. Consider some  $t$ -sparse combination, such as  $p_1 + \dots + p_t$ .  
 787 If  $-p_t$  is not very close to  $p_1 + \dots + p_{t-1}$ , then we can bound  $C(p_1 + \dots + p_t)$  by  $C(p_1 + \dots + p_{t-1})$   
 788 and  $C(p_t)$ , which are  $O(\sqrt{t} \|p_1 + \dots + p_{t-1}\|_2)$  and  $O(\sqrt{t} \|p_t\|_2)$  respectively, since the dictionary  
 789 contains an orthonormal basis for both terms. The only case where these bounds are not good enough  
 790 is when  $\|p_1 + \dots + p_t\|_2$  is much smaller than  $\|p_1 + \dots + p_{t-1}\|_2$  and  $\|p_t\|_2$ . In this case,  $p_t$  is very  
 791 close to  $\text{span}\{p_1, \dots, p_{t-1}\}$ . However, in the construction we found some (potentially different)  $p_j$   
 792 which is just as close to  $\text{span}\{p_1, \dots, p_{t-1}\}$ , and moreover is in the same group as  $p_t$ . Letting  $q$  be  
 793 the projection of  $p_j$  onto  $\text{span}\{p_1, \dots, p_{t-1}\}$ , we have the crucial fact that  $\|p_j - q\|_2$  is as small as  
 794  $\|p_1 + \dots + p_t\|_2$ .

795 Now, bounding  $C(p_1 + \dots + p_t)$  proceeds as follows. We can subtract some appropriate (bounded)  
 796 multiple of  $p_j - q$  from  $p_1 + \dots + p_t$  to zero out at least one of the coefficients. This residual  
 797 then is a  $t$ -sparse combination of  $\{p_1, \dots, p_t, p_j\}$  where two of the vectors  $\{p_t, p_j\}$  are in the same  
 798 group; thus it has small cost with respect to  $\mathcal{D}$ . Moreover,  $p_j - q$  is contained in  $\mathcal{D}$  and thus has  
 799 small cost (specifically, not much more than  $\|p_j - q\|_2$ , which crucially is not much more than  
 800  $\|p_1 + \dots + p_t\|_2$ ). It follows that  $p_1 + \dots + p_t$  has small cost.

801 Formalizing this argument, we start by proving one of the facts that we freely used above: that the  
 802 cost function  $C$  satisfies the triangle inequality.

803 **Fact D.3.** For any  $\mathcal{D} \subseteq \mathbb{R}^n$  and  $x, y \in \mathbb{R}^n$ , it holds that  $C(x + y) \leq C(x) + C(y)$ .

804 *Proof.* For any  $\alpha, \beta \in \mathbb{R}^{\mathcal{D}}$  with  $\sum_d \alpha_d d = x$  and  $\sum_d \beta_d d = y$ , the vector  $\alpha + \beta$  satisfies  $\sum_d (\alpha + \beta)_d d = x + y$ . Applying the triangle inequality to  $\sum_d |(\alpha + \beta)_d| \cdot \|\sum_i d_i p_i\|_2$  completes the  
 805 proof.  $\square$

807 We now prove the key lemma, formalizing the above intuition.

808 **Lemma D.4.** Let  $n, m, t \in \mathbb{N}$ , with  $t \geq 2$ , and  $\delta > 0$ . Fix  $p_1, \dots, p_n \in \mathbb{R}^m$  with  $\|p_i\|_2 = 1$  for all  
 809  $i \in [n]$ . Let  $\mathcal{D}$  be the output of `RepresentVectors`( $\{p_1, \dots, p_n\}, t, \delta$ ). Then  $|\mathcal{D}| = O(n^{t-1/2})$ ,  
 810 and every element of  $\mathcal{D}$  is  $t$ -sparse. Also, with probability at least  $1 - \delta$ , the following guarantees  
 811 hold. The time complexity of computing  $\mathcal{D}$  is  $O(n^{t-\Omega(1/t)} (\log n)^{O(t)} m^{O(1)} \log(1/\delta))$ . Moreover,  
 812 for every  $t$ -sparse  $x \in \mathbb{R}^n$  it holds that

$$C_{\mathcal{D}}(x) \leq O(t^{3/2} \log n) \cdot \left\| \sum x_i p_i \right\|_2.$$

813 *Proof.* Since the algorithm `RepresentVectors()` makes less than  $n^t$  queries to the data structures  
 814  $\mathcal{N}^j$ , and each query has failure probability at most  $\delta' = \delta/n^t$ , the probability that any query fails is  
 815 at most  $1 - \delta$ . We henceforth assume that all queries succeed, i.e. satisfy the correctness guarantee  
 816 and time complexity bound stated in Theorem D.1.

817 **Time complexity.** We start by analyzing the time complexity of  
 818 `RepresentVectors`( $\{p_1, \dots, p_n\}, t, \delta$ ). For any fixed  $j \in [\sqrt{n}]$ , the construction time of  
 819  $\mathcal{N}^j$  (with  $|I_j| = O(\sqrt{n})$  points in  $\mathbb{R}^m$ , query dimension  $t-1$ , and failure probability  $\delta/n^t$ ) is  
 820  $O(n^{t/2} (\log n)^{O(t)} m^{O(1)} \log(1/\delta))$ . We make  $\binom{n}{t-1} + |I_j|^2 \binom{n}{t-2} = O(n^{t-1})$  queries to  $\mathcal{N}^j$ , each  
 821 with time complexity  $n^{1/2-1/(4(t-1))} m^{O(1)} \log(1/\delta)$ . Each projection step and each orthonor-  
 822 malization step has time complexity  $\text{poly}(t, m)$ . Thus, since  $t \geq 2$ , the time complexity for any

fixed  $j$  is bounded by  $n^{t-1/2-1/(8t)}(\log n)^{O(t)}m^{O(1)}\log(1/\delta)$ . Summing over  $j$ , the overall time complexity to compute  $\mathcal{D}$  is at most  $n^{t-1/(8t)}(\log n)^{O(t)}m^{O(1)}\log(1/\delta)$  as claimed.

**Correctness.** The bound on  $|\mathcal{D}|$  and the fact that all elements of  $\mathcal{D}$  are  $t$ -sparse are immediate from the algorithm definition. It remains to bound  $C_{\mathcal{D}}(x)$  for  $t$ -sparse vectors  $x$ . First, note that for any  $(t-1)$ -sparse  $y \in \mathbb{R}^n$ , because of step (4), the dictionary contains vectors  $\gamma^1, \dots, \gamma^{t-1}$  that span  $\text{supp}(y)$  and satisfy  $\langle \sum_{i=1}^n \gamma_i^k p_i, \sum_{i=1}^n \gamma_i^\ell p_i \rangle = 0$  for all  $k \neq \ell$ . Thus, letting  $\alpha_1, \dots, \alpha_{t-1} \in \mathbb{R}$  be such that  $y = \alpha_1 \gamma^1 + \dots + \alpha_{t-1} \gamma^{t-1}$ , we get

$$C_{\mathcal{D}}(y) \leq \sum_{j=1}^{t-1} |\alpha_j| \cdot \left\| \sum_{i=1}^n \gamma_i^j p_i \right\|_2 \leq \sqrt{t} \sqrt{\sum_{j=1}^{t-1} \alpha_j^2 \left\| \sum_{i=1}^n \gamma_i^j p_i \right\|_2^2} = \sqrt{t} \left\| \sum_{i=1}^n y_i p_i \right\|_2. \quad (7)$$

Now fix any nonzero  $t$ -sparse  $x \in \mathbb{R}^n$ . Fix any  $a \in \arg \max_{i \in [n]} |x_i|$ , and let  $j \in [\sqrt{n}]$  be such that  $a \in I_j$ . Let  $T = \text{supp}(x) \setminus \{a\}$ . Let  $q := \text{Proj}_{\text{span}\{p_i : i \in T\}} p_{h(T,j)}$ . Then by the correctness guarantee of  $\mathcal{N}^j$  on query  $\text{span}\{p_i : i \in T\}$ ,

$$\|p_{h(T,j)} - q\|_2 \leq O(\log n) \cdot \left\| p_a + \sum_{i \neq a} \frac{x_i}{x_a} p_i \right\|_2 = O(\log n) \cdot \frac{\|\sum_i x_i p_i\|_2}{|x_a|}. \quad (8)$$

**Case I.** Suppose that  $\|p_{h(T,j)} - q\|_2 \geq 1/2$ . Then by (8), we have  $|x_a| \leq O(\log n) \cdot \|\sum_i x_i p_i\|_2$ . Thus, by the triangle inequality,

$$\left\| \sum_{i \neq a} x_i p_i \right\|_2 \leq |x_a| + \left\| \sum_i x_i p_i \right\|_2 \leq O(\log n) \cdot \left\| \sum_i x_i p_i \right\|_2.$$

It follows from Fact D.3 and (7) that

$$C_{\mathcal{D}}(x) \leq C_{\mathcal{D}}(x_a e_a) + C_{\mathcal{D}}(x - x_a e_a) \leq \sqrt{t}|x_a| + \sqrt{t} \left\| \sum_{i \neq a} x_i p_i \right\|_2 \leq O(\sqrt{t} \log n) \cdot \left\| \sum_i x_i p_i \right\|_2$$

as desired.

**Case II.** It remains to consider the case that  $\|p_{h(T,j)} - q\|_2 \leq 1/2$ . In this case we have  $\|q\|_2 \geq \|p_{h(T,j)}\|_2 - 1/2 \geq 1/2$ . By step (3) of the algorithm, the dictionary contains some vector  $\gamma - e_{h(T,j)}$  such that  $\text{supp}(\gamma) \subseteq T$  and  $q = \sum_{i \in T} \gamma_i p_i$ . Fix any  $b \in \arg \max_i |\gamma_i|$ . Since  $q = \sum \gamma_i p_i$  we get  $|\gamma_b| \geq \frac{\|q\|_2}{t} \geq 1/(2t)$ . Now, by Fact D.3,

$$C_{\mathcal{D}}(x) \leq C_{\mathcal{D}}\left(-\frac{x_b}{\gamma_b}(e_{h(T,j)} - \gamma)\right) + C_{\mathcal{D}}\left(x + \frac{x_b}{\gamma_b}(e_{h(T,j)} - \gamma)\right).$$

By construction,  $e_{h(T,j)} - \gamma$  is an element of the dictionary, so we can bound the first term as

$$\begin{aligned} C_{\mathcal{D}}\left(-\frac{x_b}{\gamma_b}(e_{h(T,j)} - \gamma)\right) &\leq \frac{|x_b|}{|\gamma_b|} \left\| \sum_{i=1}^n (e_{h(T,j)} - \gamma)_i p_i \right\|_2 \\ &= \frac{|x_b|}{|\gamma_b|} \|p_{h(T,j)} - q\|_2 \\ &\leq 2t|x_a| \|p_{h(T,j)} - q\|_2 \\ &\leq O(t \log n) \left\| \sum_{i=1}^n x_i p_i \right\|_2 \end{aligned}$$

where the equality uses that  $q = \sum_{i=1}^n \gamma_i p_i$ , the second inequality uses that  $|x_b| \leq |x_a|$  and  $|\gamma_b| \geq 1/(2t)$ , and the final inequality uses (8).

844 Finally, observe that

$$z := x + \frac{x_b}{\gamma_b}(e_{h(T,j)} - \gamma) = x_a e_a + \frac{x_b}{\gamma_b} e_{h(T,j)} + \sum_{i \in T \setminus \{a,b\}} \left( x_i - \frac{x_b \gamma_i}{\gamma_b} \right) e_i$$

845 since the coefficients on  $e_b$  cancel out. Thus,  $z$  is a linear combination of two elements of  $\{p_i : i \in I_j\}$  together with  $t - 2$  elements of  $\{p_i : i \in [n]\}$ . Because of step (4) of the algorithm, the  
 846 dictionary contains vectors  $\gamma^1, \dots, \gamma^t$  that span  $\text{supp}(z)$  and satisfy  $\langle \sum_{i=1}^n \gamma_i^k p_i, \sum_{i=1}^n \gamma_i^\ell p_i \rangle = 0$   
 847 for all  $k \neq \ell$ . The same argument as for (7) gives that

$$\begin{aligned} C_{\mathcal{D}} \left( x + \frac{x_b}{\gamma_b}(e_{h(T,j)} - \gamma) \right) &\leq \sqrt{t} \left\| \sum_{i=1}^n x_i p_i + \frac{x_b}{\gamma_b}(p_{h(T,j)} - q) \right\|_2 \\ &\leq \sqrt{t} \left\| \sum_{i=1}^n x_i p_i \right\|_2 + O(\sqrt{t} \log n) \frac{|x_b|}{|\gamma_b| |x_a|} \left\| \sum_{i=1}^n x_i p_i \right\|_2 \\ &\leq O(t^{3/2} \log n) \left\| \sum_{i=1}^n x_i p_i \right\|_2 \end{aligned}$$

849 where the second inequality uses the triangle inequality and (8), and the final inequality uses that  
 850  $|x_b| \leq |x_a|$  and  $|\gamma_b| \geq 1/(2t)$ . Putting everything together, we conclude that

$$C_{\mathcal{D}}(x) \leq O(t^{3/2} \log n) \left\| \sum_{i=1}^n x_i p_i \right\|_2$$

851 as claimed.  $\square$

852 We now show that `RepresentVectors()` can be applied to the columns of the sample matrix to  
 853 obtain a  $\ell_1$ -representation for  $\Sigma$  (procedure `ComputeL1Representation()` in Algorithm 5). Up  
 854 to an appropriate rescaling of the covariates, Lemma D.4 immediately implies that  $\mathcal{D}$  gives a  $\ell_1$ -  
 855 representation for the empirical covariance  $\hat{\Sigma}$ . The main result then follows from concentration of  
 856  $\hat{\Sigma}$  and sparsity of the elements of the dictionary.

857 **Theorem D.5.** *Let  $n, m, t \in \mathbb{N}$  and let  $\Sigma : n \times n$  be a positive-definite matrix. Suppose*  
 858  *$m \geq Ct \log n$  for a sufficiently large constant  $C$ . Let  $X_1, \dots, X_m \sim N(0, \Sigma)$  be indepen-*  
 859 *dent samples, and let  $\mathcal{D}$  be the output of `ComputeL1Representation` $(\{X_1, \dots, X_m\}, t)$ . Then*  
 860  *$|\mathcal{D}| \leq O(n^{t-1/2})$ , and every element of  $\mathcal{D}$  is  $t$ -sparse. Also, with probability at least  $1 - e^{-\Omega(m)}$ , the*  
 861 *time complexity of the algorithm is  $O(n^{t-\Omega(1/t)}(\log n)^{O(t)} m^{O(1)})$ , and  $\mathcal{D}$  is a  $(t, C_{\text{L1rep}} t^{3/2} \log n)$ -*  
 862  *$\ell_1$ -representation for  $\Sigma$ , for some universal constant  $C_{\text{L1rep}}$ .*

863 *Proof.* Let  $\hat{\Sigma} = \frac{1}{m} \mathbb{X}^\top \mathbb{X}$ . Let  $\tilde{\mathcal{D}}$  denote the intermediary dictionary constructed by the algorithm  
 864 using `RepresentVectors()`. With probability at least  $1 - e^{-m}$ , the successful event of Lemma D.4  
 865 holds. By standard concentration bounds (see e.g. Exercise 4.7.3 in [41]), it holds that  $\frac{1}{2} \|x\|_{\Sigma} \leq$   
 866  $\|x\|_{\hat{\Sigma}} \leq 2 \|x\|_{\Sigma}$  for all  $t$ -sparse  $x \in \mathbb{R}^n$ , with probability at least  $1 - e^{-\Omega(m)}$ . Henceforth assume  
 867 that both of these events hold.

868 **Time complexity.** The time complexity of the algorithm is dominated by the  
 869 call to `RepresentVectors()`. By the guarantee of Lemma D.4, this takes time  
 870  $O(n^{t-\Omega(1/t)}(\log n)^{O(t)} m^{O(1)})$ .

871 **Correctness.** The bounds on  $|\mathcal{D}|$  and sparsity of elements of  $\mathcal{D}$  follow from identical bounds for  
 872  $\tilde{\mathcal{D}}$  (see Lemma D.4), and the fact that every element of  $\mathcal{D}$  is obtained by rescaling the coordinates of  
 873 some element of  $\tilde{\mathcal{D}}$ . It remains to show that  $\mathcal{D}$  is a  $(t, O(t^{3/2} \log n))$ - $\ell_1$  representation for  $\Sigma$ .

874 Fix any  $t$ -sparse  $v \in \mathbb{R}^n$ , and define  $\tilde{v} = \hat{D}v$ . By the guarantee of Lemma D.4, since  $\tilde{v}$  is also  
 875  $t$ -sparse, there is some  $\alpha \in \mathbb{R}^{\tilde{\mathcal{D}}}$  such that  $\tilde{v} = \sum_{\tilde{d} \in \tilde{\mathcal{D}}} \alpha_{\tilde{d}} \tilde{d}$  and

$$\sum_{\tilde{d} \in \tilde{\mathcal{D}}} |\alpha_{\tilde{d}}| \cdot \left\| \sum_{i=1}^n \tilde{d}_i \frac{q_i}{\|q_i\|_2} \right\|_2 \leq O(t^{3/2} \log n) \cdot \left\| \sum_{i=1}^n \tilde{v}_i \frac{q_i}{\|q_i\|_2} \right\|_2.$$

---

**Algorithm 5:** Sparse linear regression for arbitrary  $\Sigma$ 


---

```

1 Procedure SparseLinearRegression( $(X_i, y_i)_{i=1}^m, t, B, \sigma^2$ )
2    $\mathcal{D} \leftarrow \text{ComputeL1Representation}(\{X_1, \dots, X_{100t \log n}\}, t)$ 
3   for  $j = m/2 + 1, \dots, m$  do
4     for  $d \in \mathcal{D}$  do
5        $\tilde{X}_{j,d} \leftarrow \left\langle X_j, d / \sqrt{(2/m) \sum_{i=1}^{m/2} \langle X_i, d \rangle^2} \right\rangle$ 
6       /* See Theorem A.7 for definition of MirrorDescentLasso(), and
          Theorem D.5 for definition of  $C_{\text{l1rep}}$  */
7        $\hat{\beta} \leftarrow \text{MirrorDescentLasso}((\tilde{X}_i, y_i)_{i=m/2+1}^m, 2C_{\text{l1rep}}t^{3/2}B \log(n), m/2, \sigma^2)$ 
8        $\hat{w} \leftarrow \sum_{d \in \mathcal{D}} \hat{\beta}_d d / \sqrt{(2/m) \sum_{i=1}^{m/2} \langle X_i, d \rangle^2}$ 
9   return  $\hat{w}$ 

```

---

But note that  $\tilde{v}_i = \hat{D}_{ii}v_i = \|q_i\|_2 v_i$  for all  $i$ . Similarly, every  $\tilde{d} \in \tilde{\mathcal{D}}$  corresponds to some  $d \in \mathcal{D}$  with  $\tilde{d}_i = \|q_i\|_2 d_i$  for all  $i$ . Thus, reindexing  $\alpha$  according to  $\mathcal{D}$  in the natural way, we have that  $v = \sum_{d \in \mathcal{D}} \alpha_d d$  and

$$\sum_{d \in \mathcal{D}} |\alpha_d| \cdot \left\| \sum_{i=1}^n d_i q_i \right\|_2 \leq O(t^{3/2} \log n) \cdot \left\| \sum_{i=1}^n v_i q_i \right\|_2.$$

But now let  $\hat{\Sigma} = \frac{1}{m} \mathbb{X}^\top \mathbb{X}$ . For any  $i, j \in [n]$  we have  $\langle q_i, q_j \rangle = m \hat{\Sigma}_{ii}$ . Hence,

$$\left\| \sum_{i=1}^n v_i q_i \right\|_2^2 = \sum_{i,j \in [n]} v_i v_j \hat{\Sigma}_{ij} = v^\top \hat{\Sigma} v$$

and similarly for  $\left\| \sum_{i=1}^n d_i q_i \right\|_2^2$ . Thus, we get

$$\sum_{d \in \mathcal{D}} |\alpha_d| \cdot \|d\|_{\hat{\Sigma}} \leq O(t^{3/2} \log n) \cdot \|v\|_{\hat{\Sigma}}.$$

But as shown above, we know that  $\frac{1}{2} \|x\|_{\Sigma} \leq \|x\|_{\hat{\Sigma}} \leq 2 \|x\|_{\Sigma}$  for all  $t$ -sparse  $x \in \mathbb{R}^n$ . Since  $v$  and all  $d \in \mathcal{D}$  are  $t$ -sparse, we conclude that

$$\sum_{d \in \mathcal{D}} |\alpha_d| \cdot \|d\|_{\Sigma} \leq O(t^{3/2} \log n) \cdot \|v\|_{\Sigma}$$

as desired.  $\square$

We finally restate and prove Theorem 3.1, as a corollary of Theorem D.5 and the well-known fact that standard “slow rate” guarantees for Lasso (i.e. based on the  $\ell_1$  norm of the regressor) can be achieved in near-linear time (Theorem A.8). The pseudocode for the main algorithm is given in Algorithm 5.

**Corollary D.6.** *Let  $n, m, t, B \in \mathbb{N}$  and  $\sigma > 0$ , and let  $\Sigma : n \times n$  be a positive-definite matrix. Let  $w^* \in \mathbb{R}^n$  be  $t$ -sparse with  $\|w^*\|_{\Sigma} \leq B$ . Suppose  $m \geq Ct \log n$  for a sufficiently large constant  $C$ . Let  $(X_i, y_i)_{i=1}^m$  be independent samples where  $X_i \sim N(0, \Sigma)$  and  $y_i = \langle X_i, w^* \rangle + N(0, \sigma^2)$ . Then there is an  $O(m^2 n^{t-1/2} + n^{t-\Omega(1/t)} \log^{O(t)} n)$ -time algorithm (Algorithm 5) that, given  $(X_i, y_i)_{i=1}^m$ ,  $t, B, \sigma^2$ , produces an estimate  $\hat{w} \in \mathbb{R}^n$  satisfying, with probability  $1 - o(1)$ ,*

$$\|\hat{w} - w^*\|_{\Sigma}^2 \leq \tilde{O} \left( \frac{\sigma^2}{\sqrt{m}} + \frac{\sigma B t^{3/2}}{\sqrt{m}} + \frac{B^2 t^3}{m} \right).$$

*Proof.* By Theorem D.5 it holds with probability  $1 - n^{-100t}$  that  $\mathcal{D}$  is a  $(t, C_{\text{l1rep}} t^{3/2} \log n)$ - $\ell_1$ -representation for  $\Sigma$ . Also, by standard concentration bounds (e.g. Exercise 4.7.3 in [41]), we have

895  $\frac{1}{2} \|x\|_{\Sigma} \leq \|x\|_{\hat{\Sigma}} \leq 2 \|x\|_{\Sigma}$  for all  $t$ -sparse  $x \in \mathbb{R}^n$  (where  $\hat{\Sigma} = \frac{2}{m} \sum_{i=1}^{m/2} X_i X_i^{\top}$ ) with probability  
 896 at least  $1 - \exp(-\Omega(m))$ . Suppose that both of these events occur.

897 For each of the remaining  $m/2$  samples  $X_j$ , compute  $\tilde{X}_j \in \mathbb{R}^{\mathcal{D}}$  where the entry  $\tilde{X}_{j,d}$  correspond-  
 898 ing to  $d \in \mathcal{D}$  is  $\langle X_j, d / \|d\|_{\hat{\Sigma}} \rangle$  (where  $\hat{\Sigma} = \frac{2}{m} \sum_{i=1}^{m/2} X_i X_i^{\top}$  is not explicitly computed; since  $d$  is  
 899 sparse, both  $\langle X_j, d \rangle$  and  $\|d\|_{\hat{\Sigma}}$  can be computed in  $\text{poly}(t, m)$  time). Let  $N(0, \Gamma)$  denote the distri-  
 900 bution of each  $\tilde{X}_j$ . For each  $d \in \mathcal{D}$ , since  $d$  is  $t$ -sparse, we have that  $\mathbb{E}_{x \sim N(0, \Sigma)} \langle x, d / \|d\|_{\hat{\Sigma}} \rangle^2 =$   
 901  $\|d\|_{\Sigma}^2 / \|d\|_{\hat{\Sigma}}^2 \leq 4$ . Thus,  $\Gamma_{dd} \leq 4$  for all  $d$ .

902 Moreover, since  $w^*$  is  $t$ -sparse, there is some  $\alpha \in \mathbb{R}^{\mathcal{D}}$  with  $w^* = \sum_d \alpha_d d$  and  $\sum_d |\alpha_d| \|d\|_{\Sigma} \leq$   
 903  $C_{1\text{rep}} t^{3/2} \log(n) \cdot \|w^*\|_{\Sigma}$ . Define  $\beta \in \mathbb{R}^{\mathcal{D}}$  by  $\beta_d = \alpha_d \|d\|_{\hat{\Sigma}}$ . Then  $w^* = \sum_d \beta_d d / \|d\|_{\hat{\Sigma}}$  and

$$\sum_d |\beta_d| \leq 2 \cdot \sum_d |\alpha_d| \|d\|_{\Sigma} \leq 2C_{1\text{rep}} t^{3/2} \log(n) \cdot \|w^*\|_{\Sigma}.$$

904 But now for any of the remaining  $m/2$  samples, we have that

$$\langle \tilde{X}_j, \beta \rangle = \sum_d \langle X_j, d / \|d\|_{\hat{\Sigma}} \rangle \alpha_d \|d\|_{\hat{\Sigma}} = \langle X_j, \sum_d \alpha_d d \rangle = \langle X_j, w^* \rangle,$$

905 and thus  $y - \langle \tilde{X}_j, \beta \rangle \sim N(0, \sigma^2)$ . So we can apply Theorem A.8 to samples  $(\tilde{X}_j, y_j)_{j=m/2+1}^m$  to  
 906 compute an estimator  $\hat{\beta}$  satisfying

$$\|\hat{\beta} - \beta\|_{\Gamma}^2 \leq \tilde{O} \left( \frac{\sigma^2}{m} + \frac{\sigma B t^{3/2}}{\sqrt{m}} + \frac{B^2 t^3}{m} \right)$$

907 using that  $\|\beta\|_1 \leq 2C_{1\text{rep}} t^{3/2} \log(n) \cdot \|w^*\|_{\Sigma} \leq 2C_{1\text{rep}} t^{3/2} B \log(n)$ , and using the bound  
 908  $\max_d \Gamma_{dd} \leq 4$ . The time complexity of this step is  $\tilde{O}(|\mathcal{D}|m^2) = \tilde{O}(m^2 n^{t-1/2})$ . Finally, com-  
 909 pute  $\hat{w} := \sum_d \hat{\beta}_d d / \|d\|_{\hat{\Sigma}}$ . We have that  $\|\hat{w} - w^*\|_{\Sigma} = \|\hat{\beta} - \beta\|_{\Gamma}$ , which completes the proof.  $\square$

## 910 E Fixed-parameter tractability in $\kappa$ and $t$

911 In this section we prove Theorem 3.2, which shows we can achieve upper bounds on  $\mathcal{N}_{t,\alpha}(\Sigma)$  for  $\alpha$   
 912 independent of  $\kappa$  and  $n$ , if we are willing to incur dependence on  $\kappa$  in the resulting bound. In fact,  
 913 we actually prove an upper bound on the packing number  $\mathcal{P}_{t,\alpha}(\Sigma)$ .

914 To achieve this, the first key idea is to consider the dual certificates for a packing. Suppose that  
 915  $v_1, \dots, v_N$  are unit vectors (in the  $\Sigma$ -norm) with  $|\langle v_i, v_j \rangle_{\Sigma}| \leq \alpha$  for all  $i \neq j$ . Then  $|\langle v_i, \Sigma v_i \rangle| \geq$   
 916  $\alpha^{-1} \max_{j \neq i} |\langle v_j, \Sigma v_i \rangle|$ , so  $\Sigma v_i$  certifies that any linear combination  $v_i = \sum_{j \neq i} x_j v_j$  must have the  
 917 property that  $\|x\|_1 \geq \alpha^{-1}$ . Thus, to show that there cannot be a large packing of sparse vectors in  
 918 the  $\Sigma$ -norm, it would suffice to prove that any large set of sparse vectors must have one vector that  
 919 can be written as a linear combination of the remaining vectors, where the coefficient vector has  
 920 small  $\ell_1$  norm. In fact, this would give an upper bound on  $\mathcal{N}_{t,\alpha}(\Sigma)$  for all  $\Sigma$ .

921 We do not know if such a statement is true. However, we can prove an *approximate* analogue. The  
 922 following lemma shows that under a condition number bound on  $\Sigma$ , the dual certificate argument  
 923 can be generalized to require only a weaker property: that any large set of sparse vectors must have  
 924 one vector that can be *approximately* written as a linear combination of the remaining vectors, with  
 925 low  $\ell_1$  cost. The approximation error determines how small the condition number must be:

926 **Lemma E.1.** *Let  $n, N, t, T \in \mathbb{N}$  and let  $\delta > 0$ . Suppose that for all  $t$ -sparse vectors  $v_1, \dots, v_N \in$   
 927  $\mathbb{R}^n$ , there exists some  $i \in [N]$  and  $x \in \mathbb{R}^N$  such that  $\|x\|_1 \leq T$  and*

$$\left\| v_i - \sum_{j \neq i} x_j v_j \right\|_2 \leq \delta \cdot \max_{j \in [N]} \|v_j\|_2.$$

928 *Then for every positive-definite matrix  $\Sigma : n \times n$  with  $\kappa(\Sigma) < 1/(\delta^2)$  it holds that  $\mathcal{P}_{t,1/(3T)}(\Sigma) \leq$   
 929  $N \log_2 \kappa(\Sigma)$ .*



930 *Proof.* Fix a positive-definite matrix  $\Sigma : n \times n$  and suppose that  $K := \mathcal{P}_{t,1/(3T)}(\Sigma) > N \log_2 \kappa(\Sigma)$ .  
 931 By definition, there are nonzero  $t$ -sparse vectors  $v_1, \dots, v_K \in \mathbb{R}^N$  such that

$$|\langle v_i, v_j \rangle_\Sigma| \leq \frac{1}{3T} \|v_i\|_\Sigma \|v_j\|_\Sigma$$

932 for all  $i \neq j$ . Without loss of generality, assume that  $\|v_i\|_2 = 1$  for all  $i \in [K]$ , so that

$$\lambda_{\min}(\Sigma) \leq \|v_i\|_\Sigma^2 \leq \lambda_{\max}(\Sigma).$$

933 So we can partition  $[K]$  into  $\log_2 \kappa(\Sigma)$  buckets such that  $\max_{i \in B} \|v_i\|_\Sigma^2 / \min_{i \in B} \|v_i\|_\Sigma^2 \leq 2$  for  
 934 each bucket  $B \subseteq [K]$ . There must be some bucket  $B$  with  $|B| \geq N$ . By assumption, there is some  
 935  $i \in B$  and  $x \in \mathbb{R}^N$  such that  $\|x\|_1 \leq T$  and

$$\left\| v_i - \sum_{j \in B: j \neq i} x_j v_j \right\|_2 \leq \delta.$$

936 Now

$$\begin{aligned} \langle v_i, v_i \rangle_\Sigma &= \left\langle \Sigma v_i, \sum_{j \in B: j \neq i} x_j v_j \right\rangle + \left\langle \Sigma v_i, v_i - \sum_{j \in B: j \neq i} x_j v_j \right\rangle \\ &= \sum_{j \in B: j \neq i} x_j \langle v_i, v_j \rangle_\Sigma + \left\langle \Sigma v_i, v_i - \sum_{j \in B: j \neq i} x_j v_j \right\rangle \\ &\leq \|x\|_1 \max_{j \in B: j \neq i} |\langle v_i, v_j \rangle_\Sigma| + \|v_i^\top \Sigma\|_2 \cdot \delta \\ &\leq \frac{\|x\|_1}{3T} \max_{j \in B: j \neq i} \|v_i\|_\Sigma \|v_j\|_\Sigma + \delta \sqrt{\lambda_{\max}(\Sigma) \cdot v_i^\top \Sigma v_i} \\ &\leq \frac{\sqrt{2} \|v_i\|_\Sigma^2}{3} + \|v_i\|_\Sigma \delta \sqrt{\lambda_{\max}(\Sigma)}. \end{aligned}$$

937 Simplifying, we get  $\|v_i\|_\Sigma \leq 2\delta \sqrt{\lambda_{\max}(\Sigma)}$ . Since also  $\|v_i\|_\Sigma \geq \sqrt{\lambda_{\min}(\Sigma)}$ , it follows that  $\kappa(\Sigma) =$   
 938  $\lambda_{\max}(\Sigma)/\lambda_{\min}(\Sigma) \geq 1/(4\delta^2)$ .  $\square$

939 It remains to show that the precondition of Lemma E.1 can be satisfied for sub-constant  $\delta$  without  
 940 requiring  $N$  to scale with  $n^t$ . We start by proving the desired property when the vectors are all  
 941  $t$ -sparse and *binary*, i.e.  $v_1, \dots, v_N \in \{0, 1\}^n$ , and afterwards we will black-box extend the result  
 942 to the real-valued setting. Concretely, given sparse binary vectors  $v_1, \dots, v_N \in \{0, 1\}^n$  (with  
 943  $N \gg n$ ), we want to find one that can be “efficiently” approximated (in  $\ell_2$  norm) by the rest, where  
 944 “efficient” means that the coefficients have small absolute sum. Thinking of each vector as the  
 945 indicator vector of a subset of  $[n]$ , a first step towards an efficient approximation for  $v_i = \mathbb{1}[\cdot \in S_i]$   
 946 may be constructing an efficient approximation for a standard basis vector  $e_j$  for some  $j \in S_i$ .

947 Indeed, there is some  $j \in [n]$  such that  $\mathcal{S}^j := \{i : v_{ij} = 1\}$  is large, i.e.  $|\mathcal{S}^j| \geq N/n$ . If the vectors  
 948  $(v_i)_{i \in \mathcal{S}^j}$  were in some sense random, then the average  $\frac{1}{|\mathcal{S}^j|} \sum_{i \in \mathcal{S}^j} v_i$  would be a good approximation  
 949 for  $e_j$ . It is also efficient, in that the absolute sum of coefficients is 1. But of course the vectors are  
 950 not random; it could be that many vectors in  $\mathcal{S}^j$  also contain some other coordinate  $j'$ . In this case  
 951 we restrict to the set of vectors containing both  $j$  and  $j'$ . Now we may hope to approximate the  
 952 vector  $\mathbb{1}[\cdot \in \{j, j'\}]$ . Completing this argument, we get the following lemma which states that there  
 953 exists a subset of  $[n]$  that is contained in many of the vectors, and that is well-approximated by the  
 954 average of those vectors.

955 For notational convenience, for vectors  $x, y \in \{0, 1\}^n$  we say that  $x \preceq y$  if  $x_i \leq y_i$  for all  $i \in [n]$ .

956 **Lemma E.2.** *Let  $n, N, t, s \in \mathbb{N}$  with  $sn \leq N$ , and let  $v_1, \dots, v_N \in \{0, 1\}^n$  be nonzero  $t$ -sparse*  
 957 *binary vectors. Then there is some set  $S \subseteq [n]$  of size  $|S| \geq s$  and some nonzero vector  $u \in \{0, 1\}^n$*   
 958 *such that  $u \preceq v_i$  for all  $i \in S$ , and*

$$\left\| u - \frac{1}{|S|} \sum_{i \in S} v_i \right\|_2 \leq \sqrt{t(sn/N)^{1/t}}.$$

959 *Proof.* For each  $J \subseteq [n]$ , define  $\mathcal{S}^J := \{i \in [N] : v_{ij} = 1 \ \forall j \in J\}$ . Since all  $v_i$  are nonzero,  
 960 there is some  $j^* \in [n]$  with  $|\mathcal{S}^{\{j^*\}}| \geq N/n$ . We iteratively construct a set  $J \subseteq [n]$  as follows.  
 961 Initially, set  $J = \{j^*\}$ . While there exists some  $a \in [n] \setminus J$  such that  $|\mathcal{S}^{J \cup \{a\}}| > (sn/N)^{1/t} |\mathcal{S}^J|$ ,  
 962 update  $J$  to  $J \cup \{a\}$  (if there are multiple such  $a$ , pick any one of them arbitrarily). At termination  
 963 of this process, we have  $|\mathcal{S}^J| > 0$ . Since every  $v_i$  is  $t$ -sparse, it must be that  $|J| \leq t$ . Thus,  
 964  $|\mathcal{S}^J| \geq (N/n) \cdot (sn/N)^{(t-1)/t} \geq s$ . Set  $S := \mathcal{S}^J$  and  $u := \mathbb{1}_J \in \{0, 1\}^n$ . By definition of  $\mathcal{S}^J$ , we  
 965 have that  $u \preceq v_i$  for all  $i \in S$ .

966 For any  $j \in J$ , we have  $u_j = 1 = \frac{1}{|S|} \sum_{i \in S} v_{ij}$ . For any  $j \notin J$ , we have  $u_j = 0$  and

$$\left| \frac{1}{|S|} \sum_{i \in S} v_{ij} \right| = \frac{|\{i \in S : v_{ij} = 1\}|}{|S|} = \frac{|\mathcal{S}^{J \cup \{j\}}|}{|\mathcal{S}^J|} \leq (sn/N)^{1/t}$$

967 by construction of  $J$ . Thus,

$$\left\| u - \frac{1}{|S|} \sum_{i \in S} v_i \right\|_{\infty} \leq (sn/N)^{1/t}.$$

968 Additionally,

$$\left\| u - \frac{1}{|S|} \sum_{i \in S} v_i \right\|_1 \leq \left\| \frac{1}{|S|} \sum_{i \in S} v_i \right\|_1 \leq \frac{1}{|S|} \sum_{i \in S} \|v_i\|_1 \leq t.$$

969 By the inequality  $\|x\|_2^2 \leq \|x\|_1 \|x\|_{\infty}$ , we conclude that

$$\left\| u - \frac{1}{|S|} \sum_{i \in S} v_i \right\|_2 \leq \sqrt{t(sn/N)^{1/t}}$$

970 as claimed.  $\square$

971 We now use Lemma E.2 to show that if  $N$  is sufficiently large, then at least one of the vectors  $v_i$   
 972 can be efficiently approximated by the rest. The proof is by induction on  $t$ . As a first attempt, one  
 973 might use Lemma E.2 to find some  $u \in \{0, 1\}^n$  and some large set  $S \subseteq [N]$  such that  $u \preceq v_i$  for  
 974 all  $i \in S$ , and the average of the  $v_i$ 's approximates  $u$ . Then, restrict to the vectors in  $S$ , and induct  
 975 on the  $(t-1)$ -sparse residual vectors  $\{v_i - u : i \in S\}$ . If one of the  $v_i - u$ 's can be efficiently  
 976 approximated by the other residuals, then since  $u$  can also be efficiently approximated, we can derive  
 977 an efficient approximation of  $v_i$  by the remaining  $v_j$ 's.

978 This doesn't quite work, since at each step of the induction the set of vectors will become smaller  
 979 by a factor of roughly  $n$ . However, instead of throwing away the vectors outside  $S =: S^{(1)}$  we can  
 980 iteratively re-apply Lemma E.2 to get disjoint sets  $S^{(1)}, S^{(2)}, \dots, S^{(m)}$ , where each  $S^{(a)}$  has the  
 981 same property as  $S$  (for some potentially different vector  $u^{(a)}$ ). We can then induct on the residual  
 982 vectors  $\cup_a \{v_i - u^{(a)} : i \in S^{(a)}\}$ . This suffices to efficiently approximate some  $v_i$ . Since we throw  
 983 away fewer vectors at each step of the induction, we do not need the initial number of vectors  $N$  to  
 984 be as large.

985 We formalize the above ideas in the following theorem.

986 **Theorem E.3.** *Let  $n, N, t \in \mathbb{N}$  and let  $v_1, \dots, v_N \in \{0, 1\}^n$  be  $t$ -sparse binary vectors. Then there*  
 987 *is some  $i \in [N]$  and  $x \in \mathbb{R}^N$  such that  $\|x\|_1 \leq 3^t$  and*

$$\left\| v_i - \sum_{j \neq i} x_j v_j \right\|_2 \leq 4^t \sqrt{9t(tn/N)^{1/t}}.$$

988 *Proof.* We induct on  $t$ , observing that the case  $t = 0$  is immediate. Fix  $t > 0$  and  $t$ -sparse vectors  
 989  $\{v_1, \dots, v_N\} \in \{0, 1\}^n$ , and suppose that the theorem statement holds for  $t-1$ . If any  $v_i$  is  
 990 identically zero, then the claim is trivially true with  $x = 0$ . If  $N \leq t3^{t+1}n$  then the RHS of the  
 991 desired norm bound exceeds  $4^t \sqrt{t}$ , so the claim is trivially true with  $x = 0$  and any  $i \in [N]$ .  
 992 Thus, we may assume that all  $v_i$  are nonzero, and  $N \geq t3^{t+1}n$ . Applying the previous lemma with

993  $s := 3^{t+1} \leq N/n$  gives some  $S^{(1)} \subseteq [N]$  and nonzero  $u^{(1)} \in \{0, 1\}^n$  such that  $|S^{(1)}| \geq 3^{t+1}$  and  
 994  $u^{(1)} \preceq v_i$  for all  $i \in S^{(1)}$ , and

$$\left\| u^{(1)} - \frac{1}{|S^{(1)}|} \sum_{i \in S^{(1)}} v_i \right\|_2 \leq \sqrt{9t(n/N)^{1/t}}.$$

995 If  $|N| - |S^{(1)}| \geq N/t \geq 3^{t+1}n$  then we can reapply the lemma with vectors  $(v_i)_{i \in [N] \setminus S^{(1)}}$  and  
 996  $s := 3^{t+1}$  to get some  $S^{(2)} \subseteq [N] \setminus S^{(1)}$  and  $u^{(2)} \in \{0, 1\}^n$ . Continuing this process so long as there  
 997 are at least  $N/t \geq 3^{t+1}n$  remaining vectors, we can generate disjoint sets  $S^{(1)}, \dots, S^{(m)} \subseteq [N]$   
 998 and vectors  $u^{(1)}, \dots, u^{(m)} \in \{0, 1\}^n$  with the following properties:

999 **(i)**  $|S^{(1)} \cup \dots \cup S^{(m)}| > N - N/t$

1000 **(ii)**  $|S^{(a)}| \geq 3^{t+1}$  for every  $a \in [m]$

1001 **(iii)** For every  $a \in [m]$ , it holds that  $u^{(a)}$  is nonzero and  $u^{(a)} \preceq v_i$  for all  $i \in S^{(a)}$

1002 **(iv)** For every  $a \in [m]$ ,

$$\left\| u^{(a)} - \frac{1}{|S^{(a)}|} \sum_{i \in S^{(a)}} v_i \right\|_2 \leq \sqrt{9t(tn/N)^{1/t}}.$$

1003 For each  $a \in [m]$  and  $i \in S^{(a)}$ , define  $v'_i := v_i - u^{(a)}$ . By Property **(iii)** we have that  $v'_i \in \{0, 1\}^N$   
 1004 and  $v'_i$  is  $(t-1)$ -sparse. By the inductive hypothesis applied to vectors  $(v'_i)_{i \in S^{(1)} \cup \dots \cup S^{(m)}}$ , there is  
 1005 some  $i \in S^{(1)} \cup \dots \cup S^{(m)}$  and  $x' \in \mathbb{R}^N$  (supported on  $S^{(1)} \cup \dots \cup S^{(m)}$ ) such that  $\|x'\|_1 \leq 3^{t-1}$   
 1006 and

$$\begin{aligned} \left\| v'_i - \sum_{j \neq i} x'_j v'_j \right\|_2 &\leq 4^{t-1} \sqrt{9(t-1)((t-1)n/|S^{(1)} \cup \dots \cup S^{(m)}|)^{1/(t-1)}} \\ &\leq 4^{t-1} \sqrt{9t(tn/N)^{1/t}} \end{aligned} \quad (9)$$

1007 where the last inequality uses Property **(i)** and the bound  $N \geq tn$ . Of course, without loss of  
 1008 generality  $x'_i = 0$ . Let  $a \in [m]$  be the unique index such that  $i \in S^{(a)}$ . We define  $x \in \{0, 1\}^N$   
 1009 (supported on  $S^{(1)} \cup \dots \cup S^{(m)}$ ) as follows. For each  $b \in [m]$  and each  $r \in S^{(b)}$ , set

$$x_r = x'_r - \frac{1}{|S^{(b)}|} \sum_{j \in S^{(b)}} x'_j + \frac{\mathbb{1}[b=a]}{|S^{(b)}|}.$$

1010 Since  $\|x'\|_1 \leq 3^{t-1}$ , we can see that

$$\begin{aligned} \|x\|_1 &\leq \|x'\|_1 + \sum_{b \in [m]} \sum_{r \in S^{(b)}} \frac{1}{|S^{(b)}|} \sum_{j \in S^{(b)}} |x'_j| + \sum_{r \in S^{(a)}} \frac{1}{|S^{(a)}|} \\ &\leq 2 \|x'\|_1 + 1 \\ &\leq 2 \cdot 3^{t-1} + 1. \end{aligned}$$

1011 Next, we use  $x$  to approximate  $v_i$ . The following bound is almost what we want:

1012 **Claim E.4.**  $\left\| v_i - \sum_{j \in [N]} x_j v_j \right\|_2 \leq 3 \cdot 4^{t-1} \sqrt{9t(tn/N)^{1/t}}$

1013 *Proof of claim.* We have

$$\left\| v_i - \sum_{r \in [N]} x_r v_r \right\|_2 \leq \left\| u^{(a)} - \frac{1}{|S^{(a)}|} \sum_{r \in S^{(a)}} v_r \right\|_2 + \left\| v'_i + \frac{1}{|S^{(a)}|} \sum_{r \in S^{(a)}} v_r - \sum_{r \in [N]} x_r v_r \right\|_2$$

$$\begin{aligned}
&= \left\| u^{(a)} - \frac{1}{|S^{(a)}|} \sum_{r \in S^{(a)}} v_r \right\|_2 + \left\| v'_i - \sum_{r \in [N]} x'_r v_r + \sum_{b \in [m]} \sum_{r \in S^{(b)}} \frac{1}{|S^{(b)}|} \sum_{j \in S^{(b)}} x'_j v_r \right\|_2 \\
&\leq \left\| u^{(a)} - \frac{1}{|S^{(a)}|} \sum_{r \in S^{(a)}} v_r \right\|_2 + \left\| v'_i - \sum_{r \in [N]} x'_r v'_r \right\|_2 \\
&\quad + \left\| - \sum_{b \in [m]} \sum_{r \in S^{(b)}} x'_r u^{(b)} + \sum_{b \in [m]} \sum_{r \in S^{(b)}} \frac{1}{|S^{(b)}|} \sum_{j \in S^{(b)}} x'_j v_r \right\|_2 \\
&= \left\| u^{(a)} - \frac{1}{|S^{(a)}|} \sum_{r \in S^{(a)}} v_r \right\|_2 + \left\| v'_i - \sum_{r \in [N]} x'_r v'_r \right\|_2 \\
&\quad + \left\| \sum_{b \in [m]} \sum_{j \in S^{(b)}} x'_j \left( u^{(b)} - \frac{1}{|S^{(b)}|} \sum_{r \in S^{(b)}} v_r \right) \right\|_2
\end{aligned}$$

1014 where the first and third inequalities use that  $v_r = v'_r + u^{(b)}$  for all  $r \in S^{(b)}$ , and throughout we use  
1015 that  $x_r = x'_r = 0$  for  $r \notin S^{(1)} \cup \dots \cup S^{(m)}$ . Applying Property (iv), equation (9), and the bound  
1016  $\|x'\|_1 \leq 3^{t-1}$ , we get

$$\begin{aligned}
\left\| v_i - \sum_{r \in [N]} x_r v_r \right\|_2 &\leq \sqrt{9t(tn/N)^{1/t}} + 4^{t-1} \sqrt{9t(tn/N)^{1/t}} + 3^{t-1} \sqrt{9t(tn/N)^{1/t}} \\
&\leq 3 \cdot 4^{t-1} \sqrt{9t(tn/N)^{1/t}}
\end{aligned}$$

1017 as claimed.  $\square$

1018 However, we wanted a bound on  $v_i - \sum_{j \neq i} x_j v_j$ , and unfortunately  $x_i \neq 0$ . Fortunately, it is enough  
1019 that  $x_i$  is bounded away from 1. Since  $x'_i = 0$ , we have

$$|x_i| \leq \frac{1}{|S^{(a)}|} \sum_{j \in S^{(a)}} |x'_j| + \frac{1}{|S^{(a)}|} \leq \frac{\|x'\|_1 + 1}{|S^{(a)}|} \leq \frac{3^{t-1} + 1}{3^{t+1}} = \frac{1}{9}.$$

1020 Thus, by Claim E.4,

$$\left\| v_i - \frac{1}{1 - x_i} \sum_{j \neq i} x_j v_j \right\|_2 \leq \frac{1}{1 - x_i} \cdot 3 \cdot 4^{t-1} \sqrt{9t(tn/N)^{1/t}} \leq 4^t \sqrt{9t(tn/N)^{1/t}}.$$

1021 Finally, we have  $\|x/(1 - x_i)\|_1 \leq (9/8)(2 \cdot 3^{t-1} + 1) \leq 3^t$ , so  $x/(1 - x_i)$  satisfies all the desired  
1022 conditions. This completes the induction.  $\square$

1023 Finally, we extend Theorem E.3 to real-valued sparse vectors via a discretization argument.

1024 **Lemma E.5.** *Let  $n, N, t \in \mathbb{N}$  and let  $v_1, \dots, v_N \in \mathbb{R}^n$  be  $t$ -sparse vectors. Then there is some*  
1025  *$i \in [N]$  and  $x \in \mathbb{R}^n$  such that  $\|x\|_1 \leq 3^t$  and*

$$\left\| v_i - \sum_{j \neq i} x_j v_j \right\|_2 \leq 4^{t+2} \sqrt{t(n/N)^{1/(4t)}} \cdot \max_{j \in [N]} \|v_j\|_\infty.$$

1026 *Proof.* Without loss of generality assume that  $\max_{j \in [N]} \|v_j\|_\infty = 1$ . Let  $k \in \mathbb{N}$  be fixed later.

1027 Define a map  $\varphi : [-1, 1] \rightarrow \{0, 1\}^{2k+1}$  by

$$\varphi(c) = \begin{cases} e_{k+1+\lfloor ck \rfloor} & \text{if } c < 0 \\ e_{k+1} & \text{if } c = 0 \\ e_{k+1+\lceil ck \rceil} & \text{if } c > 0 \end{cases}.$$

1028 Also let  $\Phi : \mathbb{R}^{2k+1} \rightarrow \mathbb{R}$  be the linear map that sends  $\Phi e_i \mapsto (i - k - 1)/k$  for each  $i \in [2k + 1]$ .  
 1029 Note that  $|\Phi\varphi(c) - c| \leq 1/k$  for all  $c \in [-1, 1]$  and  $\Phi\varphi(0) = 0$ . Define  $\varphi^{\oplus n} : [-1, 1]^n \rightarrow$   
 1030  $\{0, 1\}^{(2k+1)n}$  by  $\varphi(c_1, \dots, c_n) = (\varphi(c_1), \dots, \varphi(c_n))$ , and define  $\Phi^{\oplus n} : \{0, 1\}^{(2k+1)n} \rightarrow \mathbb{R}^n$  by  
 1031  $\Phi^{\oplus n}(x_1, \dots, x_n) = (\Phi(x_1), \dots, \Phi(x_n))$ . For any  $i \in [N]$ , the vector  $\varphi^{\oplus n}(v_i)$  is  $t$ -sparse and lies  
 1032 in  $\{0, 1\}^{(2k+1)n}$ . Thus, applying Theorem E.3 gives some  $i \in [N]$  and  $x \in \mathbb{R}^N$  with  $\|x\|_1 \leq 3^t$  and

$$\left\| \varphi^{\oplus n}(v_i) - \sum_{j \neq i} x_j \varphi^{\oplus n}(v_j) \right\|_2 \leq 4^t \sqrt{9t(tn(2k+1)/N)^{1/t}}.$$

1033 Since  $\Phi^{\oplus n}$  is a linear map and  $\|\Phi^{\oplus n}\|_2 = \|\Phi\|_2 \leq \sqrt{2k+1}$ , we then get

$$\left\| \Phi^{\oplus n} \varphi^{\oplus n}(v_i) - \sum_{j \neq i} x_j \Phi^{\oplus n} \varphi^{\oplus n}(v_j) \right\|_2 \leq 4^t \sqrt{9t(2k+1)(tn(2k+1)/N)^{1/t}}.$$

1034 But now for every  $j \in [N]$ , we know that

$$\|v_j - \Phi^{\oplus n} \varphi^{\oplus n}(v_j)\|_2^2 = \sum_{a \in \text{supp}(v_j)} (v_{ja} - \Phi\varphi(v_{ja}))^2 \leq \frac{t}{k^2}.$$

1035 We conclude that

$$\begin{aligned} \left\| v_i - \sum_{j \neq i} x_j v_j \right\|_2 &\leq \left\| \Phi^{\oplus n} \varphi^{\oplus n}(v_i) - \sum_{j \neq i} x_j \Phi^{\oplus n} \varphi^{\oplus n}(v_j) \right\|_2 + \|v_i - \Phi^{\oplus n} \varphi^{\oplus n}(v_i)\|_2 \\ &\quad + \sum_{j \neq i} |x_j| \cdot \|v_j - \Phi^{\oplus n} \varphi^{\oplus n}(v_j)\|_2 \\ &\leq 4^t \sqrt{9t(2k+1)(tn(2k+1)/N)^{1/t}} + (1 + 3^t) \cdot \frac{\sqrt{t}}{k} \\ &\leq (2k+1) \cdot 4^{t+1} \sqrt{t(n/N)^{1/(2t)}} + \frac{4^t \sqrt{t}}{k}. \end{aligned}$$

1036 Taking  $k = (N/n)^{1/(4t)}$  gives the claimed bound. □

1037 Combining Lemma E.5 with Lemma E.1 lets us prove Theorem 3.2.

1038 **Proof of Theorem 3.2.** Set  $\delta := \sqrt{1/(4\kappa)}$  and  $N = 4^{4t(t+3)} t^{2t} \kappa^{2t} n$ . By Lemma E.5, for any  
 1039  $t$ -sparse vectors  $v_1, \dots, v_N \in \mathbb{R}^n$  with  $\|v_i\|_2 \leq 1$  for all  $i \in [N]$ , there is some  $i \in [N]$  and  $x \in \mathbb{R}^N$   
 1040 such that  $\|x\|_1 \leq 3^t$  and

$$\left\| v_i - \sum_{j \neq i} x_j v_j \right\|_2 \leq 4^{t+2} \sqrt{t(n/N)^{1/(4t)}} \leq \frac{1}{4\sqrt{\kappa}} < \delta.$$

1041 It follows from Lemma E.1 that  $\mathcal{P}_{t,1/3^{t+1}}(\Sigma) \leq N \log_2 \kappa$ . Finally, by Lemma A.2, we conclude  
 1042 that  $\mathcal{N}_{t,1/3^{t+1}}(\Sigma) \leq N \log_2 \kappa$ . ■

## 1043 F Generalization bounds

### 1044 F.1 Finite-class model selection

1045 **Lemma F.1.** Let  $n, m, n_{\text{eff}} \in \mathbb{N}$  and let  $\Sigma$  be a positive semi-definite matrix. Fix a vector  $w^* \in \mathbb{R}^n$   
 1046 and a closed set  $\mathcal{W} \subseteq \mathbb{R}^n$  and let  $(X_i, y_i)_{i=1}^m$  be independent draws  $X_i \sim N(0, \Sigma)$  and  $y_i =$   
 1047  $\langle X_i, w^* \rangle + \xi_i$  where  $\xi_i \sim N(0, \sigma^2)$ . Pick

$$\hat{w} \in \operatorname{argmin}_{w \in \mathcal{W}} \|\mathbb{X}w - y\|_2^2$$

1048 where  $\mathbb{X} : m \times n$  is the matrix with rows  $X_1, \dots, X_m$ . For any  $\epsilon, \delta \in (0, 1)$ , suppose that with  
 1049 probability at least  $1 - \delta$ , the following bounds hold uniformly over  $w \in \mathcal{W}$ :

$$1. \left| \frac{1}{m} \|\mathbb{X}(w - w^*)\|_2^2 - \|w - w^*\|_\Sigma^2 \right| \leq \epsilon \|w - w^*\|_\Sigma^2$$

$$2. \left| \left\langle \xi, \frac{\mathbb{X}(w - w^*)}{\|\mathbb{X}(w - w^*)\|_2} \right\rangle \right| \leq \sigma \sqrt{n_{\text{eff}}}.$$

Then with probability at least  $1 - \delta$  it also holds that

$$\|\hat{w} - w^*\|_\Sigma \leq \sqrt{\frac{1+\epsilon}{1-\epsilon}} \inf_{w \in \mathcal{W}} \|w - w^*\|_\Sigma + 2\sigma \sqrt{\frac{2n_{\text{eff}}}{m}}.$$

*Proof.* Consider the event in which both bounds hold. Let  $w_{\text{opt}} \in \operatorname{argmin}_{w \in \mathcal{W}} \|w - w^*\|_\Sigma^2$ . Then

$$\begin{aligned} \|\mathbb{X}(\hat{w} - w^*)\|_2^2 &= \|\mathbb{X}\hat{w} - y\|_2^2 + 2\langle \xi, \mathbb{X}(\hat{w} - w^*) \rangle - \|\xi\|_2^2 \\ &\leq \|\mathbb{X}w_{\text{opt}} - y\|_2^2 + 2\langle \xi, \mathbb{X}(\hat{w} - w^*) \rangle - \|\xi\|_2^2 \\ &= \|\mathbb{X}(w_{\text{opt}} - w^*)\|_2^2 + 2\langle \xi, \mathbb{X}(\hat{w} - w^*) \rangle - 2\langle \xi, \mathbb{X}(w_{\text{opt}} - w^*) \rangle \\ &\leq \|\mathbb{X}(w_{\text{opt}} - w^*)\|_2^2 + 2 \left( \|\mathbb{X}(\hat{w} - w^*)\|_2 + \|\mathbb{X}(w_{\text{opt}} - w^*)\|_2 \right) \sigma \sqrt{n_{\text{eff}}}. \end{aligned}$$

Subtracting  $\|\mathbb{X}(w_{\text{opt}} - w^*)\|_2^2$  from both sides and dividing by  $\|\mathbb{X}(\hat{w} - w^*)\|_2 + \|\mathbb{X}(w_{\text{opt}} - w^*)\|_2$ , we get that

$$\|\mathbb{X}(\hat{w} - w^*)\|_2 - \|\mathbb{X}(w_{\text{opt}} - w^*)\|_2 \leq 2\sigma \sqrt{n_{\text{eff}}}.$$

It follows that

$$\begin{aligned} \|\hat{w} - w^*\|_\Sigma &\leq \sqrt{\frac{1}{(1-\epsilon)m}} \|\mathbb{X}(\hat{w} - w^*)\|_2 \\ &\leq \sqrt{\frac{1}{(1-\epsilon)m}} \|\mathbb{X}(w_{\text{opt}} - w^*)\|_2 + 2\sigma \sqrt{\frac{(1+\epsilon)n_{\text{eff}}}{m}} \\ &\leq \sqrt{\frac{1+\epsilon}{1-\epsilon}} \|w_{\text{opt}} - w^*\|_\Sigma + 2\sigma \sqrt{\frac{2n_{\text{eff}}}{m}} \end{aligned}$$

as desired.  $\square$

**Lemma F.2.** Let  $n, m \in \mathbb{N}$  and let  $\Sigma$  be a positive semi-definite matrix. Fix a vector  $w^* \in \mathbb{R}^n$  and a finite set  $\mathcal{W} \subseteq \mathbb{R}^n$  and let  $(X_i, y_i)_{i=1}^m$  be independent draws  $X_i \sim N(0, \Sigma)$  and  $y_i = \langle X_i, w^* \rangle + \xi_i$  where  $\xi_i \sim N(0, \sigma^2)$ . Pick

$$\hat{w} \in \operatorname{argmin}_{w \in \mathcal{W}} \|\mathbb{X}w - y\|_2^2.$$

For any  $\epsilon, \delta \in (0, 1)$ , if  $m \geq 8\epsilon^{-2} \log(2|\mathcal{W}|/\delta)$ , then with probability at least  $1 - 2\delta$ , we have

$$\|\hat{w} - w^*\|_\Sigma \leq \sqrt{\frac{1+\epsilon}{1-\epsilon}} \inf_{w \in \mathcal{W}} \|w - w^*\|_\Sigma + 4\sigma \sqrt{\frac{\log(2|\mathcal{W}|/\delta)}{m}}.$$

*Proof.* For any fixed  $w \in \mathcal{W}$ , the random variables  $\langle X_i, w - w^* \rangle \sim N(0, \|w - w^*\|_\Sigma^2)$  are independent, and therefore  $\|\mathbb{X}(w - w^*)\|_2^2 \sim \|w - w^*\|_\Sigma^2 \chi_m^2$ . It follows that for any  $\epsilon > 0$ ,

$$\Pr \left[ \left| \frac{1}{m} \|\mathbb{X}(w - w^*)\|_2^2 - \|w - w^*\|_\Sigma^2 \right| > \epsilon \|w - w^*\|_\Sigma^2 \right] \leq 2e^{-m\epsilon^2/8}.$$

By the union bound, if  $m \geq 8\epsilon^{-2} \log(2|\mathcal{W}|/\delta)$ , then with probability at least  $1 - \delta$  it holds that for all  $w \in \mathcal{W}$ ,

$$\left| \frac{1}{m} \|\mathbb{X}(w - w^*)\|_2^2 - \|w - w^*\|_\Sigma^2 \right| \leq \epsilon \|w - w^*\|_\Sigma^2. \quad (10)$$

Also, for any fixed  $w \in \mathcal{W}$ , conditioned on  $\mathbb{X}$ , the random variable  $\langle \xi, \frac{\mathbb{X}(w - w^*)}{\|\mathbb{X}(w - w^*)\|_2} \rangle$  has distribution  $N(0, \sigma^2)$ . Thus, by a Gaussian tail bound and the union bound, we have for any  $t > 0$  that

$$\Pr \left[ \max_{w \in \mathcal{W}} \left| \left\langle \xi, \frac{\mathbb{X}(w - w^*)}{\|\mathbb{X}(w - w^*)\|_2} \right\rangle \right| \geq \sigma t \right] \leq 2|\mathcal{W}| \cdot e^{-t^2/2}.$$

1068 In particular, with probability at least  $1 - \delta$  it holds that

$$\max_{w \in \mathcal{W}} \left| \left\langle \xi, \frac{\mathbb{X}(w - w^*)}{\|\mathbb{X}(w - w^*)\|} \right\rangle \right| \leq \sigma \sqrt{2 \log(2|\mathcal{W}|/\delta)}. \quad (11)$$

1069 Using (10) and (11) we apply Lemma F.1 which gives the desired bound.  $\square$

## 1070 F.2 Weak learning

1071 **Lemma F.3.** *Let  $n, m \in \mathbb{N}$  and  $\epsilon, \delta > 0$ . Let  $\Sigma : n \times n$  be a positive semi-definite matrix and*  
 1072 *let  $\mathbb{X} : m \times n$  have independent rows  $X_1, \dots, X_m \sim N(0, \Sigma)$ . For any fixed  $u, v \in \mathbb{R}^n$ , if*  
 1073  *$m \geq 8\epsilon^{-2} \log(8/\delta)$ , then it holds with probability at least  $1 - \delta$  that*

$$\left| u^\top \left( \frac{1}{m} \mathbb{X}^\top \mathbb{X} - \Sigma \right) v \right| \leq 2\epsilon \|u\|_\Sigma \|v\|_\Sigma.$$

1074 *Proof.* Decompose  $u = av + w$  where  $\langle v, w \rangle_\Sigma = 0$ , so that  $a = \langle u, v \rangle_\Sigma / \|v\|_\Sigma^2$ . Since  $\|\mathbb{X}v\|_2^2 \sim$   
 1075  $\|v\|_\Sigma^2 \chi_m^2$  and  $m \geq 8\epsilon^{-2} \log(4/\delta)$  it holds with probability at least  $1 - \delta/2$  that

$$\left| v^\top \left( \frac{1}{m} \mathbb{X}^\top \mathbb{X} - \Sigma \right) v \right| = \left| \frac{1}{m} \sum_{i=1}^m \langle X_i, v \rangle^2 - \|v\|_\Sigma^2 \right| \leq \epsilon \|v\|_\Sigma^2.$$

1076 Next,

$$\left| w^\top \left( \frac{1}{m} \mathbb{X}^\top \mathbb{X} - \Sigma \right) v \right| = \left| \frac{1}{m} \sum_{i=1}^m \langle X_i, w \rangle \langle X_i, v \rangle \right| = \left| \frac{1}{m} \sum_{i=1}^m \langle Z_i, \Sigma^{1/2} w \rangle \langle Z_i, \Sigma^{1/2} v \rangle \right|$$

1077 where we define independent random vectors  $Z_1, \dots, Z_m \sim N(0, I_n)$  so that  $X_i = \Sigma^{1/2} Z_i$ . Since  
 1078  $m \geq 8 \log(2/\delta)$ , with probability at least  $1 - \delta/4$  we have  $\sum_{i=1}^m \langle Z_i, \Sigma^{1/2} v \rangle^2 \leq 2m \|v\|_\Sigma^2$ . Condi-  
 1079 tion on the value of this sum, and note that since  $\Sigma^{1/2} v \perp \Sigma^{1/2} w$ , the random variables  $\langle Z_i, \Sigma^{1/2} w \rangle$   
 1080 are still (independent and) distributed as  $N(0, \|w\|_\Sigma^2)$ . Thus

$$\frac{1}{m} \sum_{i=1}^m \langle Z_i, \Sigma^{1/2} w \rangle \langle Z_i, \Sigma^{1/2} v \rangle \sim N \left( 0, \frac{1}{m^2} \sum_{i=1}^m \|w\|_\Sigma^2 \langle Z_i, \Sigma^{1/2} v \rangle^2 \right).$$

1081 When the variance is at most  $2 \|w\|_\Sigma^2 \|v\|_\Sigma^2 / m$ , we have with probability at least  $1 - \delta/4$  that the  
 1082 sum is at most  $2 \|w\|_\Sigma \|v\|_\Sigma \sqrt{2 \log(8/\delta)/m}$  in magnitude. So, using  $m \geq 8\epsilon^{-2} \log(8/\delta)$  it holds  
 1083 unconditionally with probability at least  $1 - \delta/2$  that

$$\left| \frac{1}{m} \sum_{i=1}^m \langle Z_i, \Sigma^{1/2} w \rangle \langle Z_i, \Sigma^{1/2} v \rangle \right| \leq \epsilon \|w\|_\Sigma \|v\|_\Sigma.$$

1084 In all, we have that

$$\left| u^\top \left( \frac{1}{m} \mathbb{X}^\top \mathbb{X} - \Sigma \right) v \right| \leq |a| \epsilon \|v\|_\Sigma^2 + \epsilon \|w\|_\Sigma \|v\|_\Sigma \leq 2\epsilon \|u\|_\Sigma \|v\|_\Sigma$$

1085 using that  $|a| \leq \|u\|_\Sigma / \|v\|_\Sigma$  and  $\|w\|_\Sigma \leq \|u\|_\Sigma$ .  $\square$

1086 **Lemma F.4.** *Let  $n, m \in \mathbb{N}$  and let  $\Sigma$  be a positive semi-definite matrix. Fix a vector  $w^* \in \mathbb{R}^n$  and a*  
 1087 *finite set  $\mathcal{W} \subseteq \mathbb{R}^n$  and let  $(X_i, y_i)_{i=1}^m$  be independent draws  $X_i \sim N(0, \Sigma)$  and  $y_i = \langle X_i, w^* \rangle + \xi_i$*   
 1088 *where  $\xi_i \sim N(0, \sigma^2)$ . Pick*

$$(\hat{w}, \hat{\beta}) \in \underset{\substack{w \in \mathcal{W} \\ \beta \in \mathbb{R}}}{\operatorname{argmin}} \|\beta \mathbb{X} w - y\|_2^2.$$

1089 Suppose  $\alpha := \max_{w \in \mathcal{W}} \frac{\langle w, w^* \rangle_\Sigma}{\|w\|_\Sigma \|w^*\|_\Sigma} > 0$ . For any  $\delta > 0$ , if  $m \geq C \alpha^{-2} \log(32|\mathcal{W}|/\delta)$  for a  
 1090 sufficiently large absolute constant  $C$ , then with probability at least  $1 - \delta$ ,

$$\left\| \hat{\beta} \hat{w} - w^* \right\|_\Sigma^2 \leq (1 - \alpha^2/4) \|w^*\|_\Sigma^2 + \frac{400\sigma^2 \log(4|\mathcal{W}|/\delta)}{\alpha^2 m}.$$

1091 *Proof.* For any vectors  $u, v \in \mathbb{R}^n$ , define  $\Delta(u, v) = u^\top \left( \frac{1}{m} \mathbb{X}^\top \mathbb{X} - \Sigma \right) v$ .

1092 **Claim F.5.** With probability at least  $1 - \delta$ , the following bounds hold uniformly over  $w \in \mathcal{W}$  and  
 1093  $\beta \in \mathbb{R}$ :

- 1094 1.  $\left| \left\langle \xi, \frac{\mathbb{X}(\beta w - w^*)}{\|\mathbb{X}(\beta w - w^*)\|_2} \right\rangle \right| \leq \sigma \sqrt{n_{\text{eff}}} \text{ where } n_{\text{eff}} := 2 \log(32|\mathcal{W}|/\delta).$
- 1095 2.  $|\Delta(\beta w, w^*)| \leq \frac{\alpha}{100} \|\beta w\|_\Sigma \|w^*\|_\Sigma$
- 1096 3.  $|\Delta(\beta w, \beta w)| \leq \frac{\alpha}{100} \|\beta w\|_\Sigma^2.$

1097 *Proof of claim.* For item (1), fix  $w \in \mathcal{W}$ . Let  $\Phi^{(w)} : 2 \times m$  be a matrix whose rows form an  
 1098 orthonormal basis for  $\text{span}\{\mathbb{X}w, \mathbb{X}w^*\} \subseteq \mathbb{R}^m$ . Then (denoting the unit Euclidean ball in  $\mathbb{R}^2$  by  $B_2$ )  
 1099 we have for all  $\beta \in \mathbb{R}$  that

$$\left| \left\langle \xi, \frac{\mathbb{X}(\beta w - w^*)}{\|\mathbb{X}(\beta w - w^*)\|_2} \right\rangle \right| \leq \sup_{u \in B_2} \left| \left\langle \xi, (\Phi^{(w)})^\top u \right\rangle \right| \leq \left\| \Phi^{(w)} \xi \right\|_2 \leq \sqrt{2} \max_{i \in [2]} |\langle \Phi_i^{(w)}, \xi \rangle|.$$

1100 Since  $\langle \Phi_i^{(w)}, \xi \rangle \sim N(0, \sigma^2)$ , we have  $\Pr[|\langle \Phi_i^{(w)}, \xi \rangle| > \sigma \sqrt{2 \log(4|\mathcal{W}|/\delta)}] \leq \delta/(4|\mathcal{W}|)$ . A union  
 1101 bound over  $i \in [2]$  and  $w \in \mathcal{W}$  gives that condition (2) in Lemma F.1 is satisfied with probability at  
 1102 least  $1 - \delta/2$ .

1103 For items (2) and (3), note that  $\Delta$  is bilinear, so it suffices to take  $\beta = 1$ . Applying Lemma F.3 and  
 1104 the union bound, so long as  $m \geq C\alpha^{-2} \log(32|\mathcal{W}|/\delta)$  for a sufficiently large constant  $C$ , items (2)  
 1105 and (3) hold simultaneously with probability at least  $1 - \delta/2$ .  $\square$

1106 Henceforth we assume that all of the events in the above claim hold. Let  $w_0 \in \mathcal{W}$  be such that  
 1107  $|\langle w_0, w^* \rangle_\Sigma| = \alpha \|w_0\|_\Sigma \|w^*\|_\Sigma$ . Let  $\beta_0 = \langle w_0, w^* \rangle_\Sigma / \|w_0\|_\Sigma^2$ . Then

$$\|\beta_0 w_0 - w^*\|_\Sigma^2 = (1 - \alpha^2) \|w^*\|_\Sigma^2.$$

1108 **Claim F.6.** The excess empirical risk can be bounded as

$$\left\| \mathbb{X}(\hat{\beta} \hat{w} - w^*) \right\|_2 \leq \|\mathbb{X}(w_0 - w^*)\|_2 + 2\sigma \sqrt{n_{\text{eff}}}.$$

1109 *Proof of claim.* We have

$$\begin{aligned} \left\| \mathbb{X}(\hat{\beta} \hat{w} - w^*) \right\|_2^2 &= \left\| \mathbb{X} \hat{\beta} \hat{w} - y \right\|_2^2 + 2 \langle \xi, \mathbb{X}(\hat{\beta} \hat{w} - w^*) \rangle - \|\xi\|_2^2 \\ &\leq \left\| \mathbb{X} \beta_0 w_0 - y \right\|_2^2 + 2 \langle \xi, \mathbb{X}(\hat{\beta} \hat{w} - w^*) \rangle - \|\xi\|_2^2 \\ &= \left\| \mathbb{X}(\beta_0 w_0 - w^*) \right\|_2^2 + 2 \langle \xi, \mathbb{X}(\hat{\beta} \hat{w} - w^*) \rangle - 2 \langle \xi, \mathbb{X}(\beta_0 w_0 - w^*) \rangle \\ &\leq \left\| \mathbb{X}(\beta_0 w_0 - w^*) \right\|_2^2 + 2 \left( \left\| \mathbb{X}(\hat{\beta} \hat{w} - w^*) \right\|_2 + \left\| \mathbb{X}(\beta_0 w_0 - w^*) \right\|_2 \right) \sigma \sqrt{n_{\text{eff}}} \end{aligned}$$

1110 where the last bound is by item (1) of Claim F.5. Simplifying, we get the claimed bound.  $\square$

1111 Now we have

$$\begin{aligned} \left\| \hat{\beta} \hat{w} - w^* \right\|_\Sigma^2 &= \frac{1}{m} \left\| \mathbb{X}(\hat{\beta} \hat{w} - w^*) \right\|_2^2 - \Delta(\hat{\beta} \hat{w} - w^*, \hat{\beta} \hat{w} - w^*) \\ &\leq \frac{1}{m} (\left\| \mathbb{X}(\beta_0 w_0 - w^*) \right\|_2 + 2\sigma \sqrt{n_{\text{eff}}})^2 - \Delta(\hat{\beta} \hat{w} - w^*, \hat{\beta} \hat{w} - w^*) \\ &\leq \frac{1 + \alpha^2/100}{m} \left\| \mathbb{X}(\beta_0 w_0 - w^*) \right\|_2^2 + (1 + 100\alpha^{-2}) \frac{\sigma^2 n_{\text{eff}}}{m} - \Delta(\hat{\beta} \hat{w} - w^*, \hat{\beta} \hat{w} - w^*) \\ &= (1 + \alpha^2/100) \|\beta_0 w_0 - w^*\|_\Sigma^2 + (1 + 100\alpha^{-2}) \frac{\sigma^2 n_{\text{eff}}}{m} \\ &\quad - \Delta(\hat{\beta} \hat{w} - w^*, \hat{\beta} \hat{w} - w^*) + \left( 1 + \frac{\alpha^2}{100} \right) \Delta(\beta_0 w_0 - w^*, \beta_0 w_0 - w^*) \end{aligned}$$



$$\begin{aligned}
&\leq (1 + \alpha^2/100) \|\beta_0 w_0 - w^*\|_\Sigma^2 + (1 + 100\alpha^{-2}) \frac{\sigma^2 n_{\text{eff}}}{m} \\
&\quad + |\Delta(\hat{\beta}\hat{w}, \hat{\beta}\hat{w})| + 2|\Delta(\hat{\beta}\hat{w}, w^*)| \\
&\quad + (1 + \alpha^2/100)|\Delta(\beta_0 w_0, \beta_0 w_0)| + 2(1 + \alpha^2/100)|\Delta(\beta_0 w_0, w^*)| \\
&\quad + (\alpha^2/100)|\Delta(w^*, w^*)|.
\end{aligned}$$

1112 where the first inequality is by Claim F.6, the second inequality is by AM-GM, and the final in-  
1113 equality is expanding out the terms  $\Delta(\hat{\beta}\hat{w} - w^*, \hat{\beta}\hat{w} - w^*)$  and  $\Delta(\beta_0 w_0 - w^*, \beta_0 w_0 - w^*)$  (via  
1114 bilinearity) and cancelling out the common term  $\Delta(w^*, w^*)$ . Finally applying items (2) and (3) of  
1115 Claim F.5, we get

$$\begin{aligned}
\|\hat{\beta}\hat{w} - w^*\|_\Sigma^2 &\leq (1 + \alpha^2/100) \|\beta_0 w_0 - w^*\|_\Sigma^2 + (1 + 100\alpha^{-2}) \frac{\sigma^2 n_{\text{eff}}}{m} \\
&\quad + \frac{\alpha}{100} \|\hat{\beta}\hat{w}\|_\Sigma^2 + \frac{\alpha}{50} \|\hat{\beta}\hat{w}\|_\Sigma \|w^*\|_\Sigma \\
&\quad + \frac{\alpha}{50} \|\beta_0 w_0\|_\Sigma^2 + \frac{\alpha}{25} \|\beta_0 w_0\|_\Sigma \|w^*\|_\Sigma + \frac{\alpha^3}{100} \|w^*\|_\Sigma^2 \\
&\leq (1 - 9\alpha^2/10) \|w^*\|_\Sigma^2 + \frac{101\sigma^2 n_{\text{eff}}}{\alpha^2 m} \\
&\quad + \frac{\alpha}{100} \|\hat{\beta}\hat{w}\|_\Sigma^2 + \frac{\alpha}{50} \|\hat{\beta}\hat{w}\|_\Sigma \|w^*\|_\Sigma
\end{aligned} \tag{12}$$

1116 where the second inequality uses the bounds  $\|\beta_0 w_0 - w^*\|_\Sigma^2 = (1 - \alpha^2) \|w^*\|_\Sigma^2$  and

$$\|\beta_0 w_0\|_\Sigma = \frac{|\langle w_0, w^* \rangle_\Sigma|}{\|w_0\|_\Sigma} = \alpha \|w^*\|_\Sigma.$$

1117 But now on the other hand,

$$\|\hat{\beta}\hat{w} - w^*\|_\Sigma^2 = \|\hat{\beta}\hat{w}\|_\Sigma^2 + \|w^*\|_\Sigma^2 - 2\langle \hat{\beta}\hat{w}, w^* \rangle_\Sigma \geq \|\hat{\beta}\hat{w}\|_\Sigma^2 + \|w^*\|_\Sigma^2 + 2\alpha \|\hat{\beta}\hat{w}\|_\Sigma \|w^*\|_\Sigma.$$

1118 Comparing with (12) gives

$$\left(1 - \frac{\alpha}{100}\right) \|\hat{\beta}\hat{w}\|_\Sigma^2 \leq \frac{101\sigma^2 n_{\text{eff}}}{\alpha^2 m} + 3\alpha \|\hat{\beta}\hat{w}\|_\Sigma \|w^*\|_\Sigma$$

1119 and therefore

$$\|\hat{\beta}\hat{w}\|_\Sigma \leq 4\alpha \|w^*\|_\Sigma + \sigma \sqrt{\frac{101n_{\text{eff}}}{\alpha^2 m}}.$$

1120 Substituting into (12) we finally get

$$\|\hat{\beta}\hat{w} - w^*\|_\Sigma^2 \leq (1 - \alpha^2/2) \|w^*\|_\Sigma^2 + \frac{200\sigma^2 n_{\text{eff}}}{\alpha^2 m}$$

1121 as desired.  $\square$

### 1122 F.3 Excess risk at optima of additively-regularized programs

1123 **Lemma F.7.** *Let  $n \in \mathbb{N}$ , and let  $\Sigma : n \times n$  be a positive semi-definite matrix. For some seminorm*  
1124  *$\Phi : \mathbb{R}^n \rightarrow [0, \infty)$  and some  $p, \delta > 0$ , assume that with probability at least  $1 - \delta$  over  $G \sim N(0, \Sigma)$*   
1125 *it holds uniformly over  $v \in \mathbb{R}^n$  that*

$$\langle v, G \rangle \leq \frac{1}{2} \Phi(v) + \sqrt{p} \|v\|_\Sigma.$$

1126 *Fix a vector  $v^* \in \mathbb{R}^n$ . For any  $m \in \mathbb{N}$  and  $\sigma > 0$  let  $(X_i, y_i)_{i=1}^m$  be independent samples distributed*  
1127 *as  $X_i \sim N(0, \Sigma)$  and  $y_i = \langle X_i, v^* \rangle + \xi_i$  where  $\xi_i \sim N(0, \sigma^2)$ . Define*

$$\hat{v} \in \operatorname{argmin}_{v \in \mathbb{R}^n} \|\mathbb{X}v - y\|_2^2 + \Phi(v)^2 + \|y\|_2 \Phi(v)$$

1128 *where  $\mathbb{X} : m \times n$  is the matrix with rows  $X_1, \dots, X_m$ . Then with probability at least  $1 - 7\delta$  over*  
1129  *$(X_i, y_i)_{i=1}^m$ , so long as  $m \geq 16p + 196 \log(12/\delta)$ , it holds that*

$$\|\hat{v} - v^*\|_\Sigma^2 \leq \frac{128\sigma^2 p}{m} + \frac{8(\sigma + \|v^*\|_\Sigma)\Phi(v^*)}{\sqrt{m}} + \frac{8\Phi(w^*)^2}{m}.$$

1130 *Proof.* For notational convenience, define  $F(v) := (1/2)\Phi(v - v^*) + \sqrt{p}\|v - v^*\|_\Sigma$ . We apply the  
 1131 lemma's assumption twice:

1132 • For any fixed  $\xi$ , the random variable  $\mathbb{X}\xi$  has distribution  $N(0, \|\xi\|_2^2 \Sigma)$ . By the above claim,  
 1133 with probability at least  $1 - \delta$  over  $\mathbb{X}$ , we have  $\langle \xi, \mathbb{X}(v - v^*) \rangle \leq \|\xi\|_2 F(v)$  uniformly in  
 1134  $v \in \mathbb{R}^n$ .

1135 Since  $\|\xi\|_2^2 \sim \sigma^2 \chi_m^2$  and  $m \geq 8 \log(2/\delta)$ , it holds with probability at least  $1 - \delta$  that  
 1136  $\frac{1}{\sqrt{m}} \|\xi\|_2 \leq \sqrt{2}\sigma$ . Thus, with probability at least  $1 - 2\delta$ , we have

$$\langle \xi, \mathbb{X}(v - v^*) \rangle \leq \sqrt{2m\sigma} F(v) \quad (13)$$

1137 uniformly in  $v \in \mathbb{R}^n$ .

1138 • The assumption means that we can apply Theorem C.1 with (noiseless) samples  
 1139  $(X_i, \langle X_i, v^* \rangle)_{i=1}^m$  to get the following: since  $m \geq 196 \log(12/\delta)$ , it holds with probability  
 1140 at least  $1 - 4\delta$  over the randomness of  $\mathbb{X}$  that for all  $v \in \mathbb{R}^n$ ,

$$\|v - v^*\|_\Sigma^2 \leq \frac{2}{m} \|\mathbb{X}(v - v^*)\|_2^2 + \frac{2}{m} F(v)^2. \quad (14)$$

1141 We also observe that the entries of  $y$  are independent and identically distributed as  $N(0, \|v^*\|_\Sigma^2 + \sigma^2)$ ,  
 1142 so by a  $\chi^2$  tail bound, since  $m \geq 32 \log(2/\delta)$ , it holds with probability at least  $1 - \delta$  that

$$\frac{1}{m} \|y\|_2^2 \in \left[ \frac{1}{2} (\|v^*\|_\Sigma^2 + \sigma^2), \frac{3}{2} (\|v^*\|_\Sigma^2 + \sigma^2) \right]. \quad (15)$$

1143 We now condition on the event (which occurs with probability at least  $1 - 7\delta$ ) that the bounds (13),  
 1144 (14), and (15) all hold. Specifying (14) to  $v := \hat{v}$ , we get that

$$\begin{aligned} & \frac{m}{2} \|\hat{v} - v^*\|_\Sigma^2 \\ & \leq \|\mathbb{X}(\hat{v} - v^*)\|_2^2 + F(\hat{v})^2 \\ & \leq \|\mathbb{X}(\hat{v} - v^*)\|_2^2 - \|\mathbb{X}\hat{v} - y\|_2^2 - \Phi(\hat{v})^2 - \|y\|_2 \Phi(\hat{v}) \\ & \quad + \|\mathbb{X}v^* - y\|_2^2 + \Phi(v^*)^2 + \|y\|_2 \Phi(v^*) + F(\hat{v})^2 \\ & = 2\langle \mathbb{X}v^* - y, \mathbb{X}(\hat{v} - v^*) \rangle \\ & \quad - \Phi(\hat{v})^2 - \|y\|_2 \Phi(\hat{v}) + \Phi(v^*)^2 + \|y\|_2 \Phi(v^*) + F(\hat{v})^2 \\ & \leq \sqrt{2m\sigma} F(\hat{v}) - \Phi(\hat{v})^2 - \|y\|_2 \Phi(\hat{v}) + \Phi(v^*)^2 + \|y\|_2 \Phi(v^*) + F(\hat{v})^2 \end{aligned}$$

1145 where the first inequality is by (14), the second inequality is by optimality of  $\hat{v}$ , and the third in-  
 1146 equality is by (13). We now expand  $F(\hat{v})$  in the above expression. If  $\sqrt{2mp\sigma} \|\hat{v} - v^*\|_\Sigma$  exceeds  
 1147  $\frac{m}{8} \|\hat{v} - v^*\|_\Sigma^2$  then the lemma immediately holds since

$$\|\hat{v} - v^*\|_\Sigma^2 \leq \frac{128\sigma^2 p}{m}.$$

1148 So we may assume that in fact  $\sqrt{2mp\sigma} \|\hat{v} - v^*\|_\Sigma \leq \frac{m}{8} \|\hat{v} - v^*\|_\Sigma^2$ . By the lemma assumptions,  
 1149 we also know that  $m \geq 16p$ . Thus, expanding  $F(\hat{v})$  and applying these bounds,

$$\begin{aligned} \frac{m}{2} \|\hat{v} - v^*\|_\Sigma^2 & \leq \sqrt{2m\sigma} \left( \frac{1}{2} \Phi(\hat{v} - v^*) + \sqrt{p} \|\hat{v} - v^*\|_\Sigma \right) \\ & \quad - \Phi(\hat{v})^2 - \|y\|_2 \Phi(\hat{v}) + \Phi(v^*)^2 + \|y\|_2 \Phi(v^*) \\ & \quad + \frac{1}{2} \Phi(\hat{v} - v^*)^2 + 2p \|\hat{v} - v^*\|_\Sigma^2 \\ & \leq \sqrt{\frac{m}{2}} \sigma \Phi(\hat{v} - v^*) + \frac{m}{8} \|\hat{v} - v^*\|_\Sigma^2 \\ & \quad - \Phi(\hat{v})^2 - \|y\|_2 \Phi(\hat{v}) + \Phi(v^*)^2 + \|y\|_2 \Phi(v^*) \end{aligned}$$

$$+ \frac{1}{2} \Phi(\hat{v} - v^*)^2 + \frac{m}{8} \|\hat{v} - v^*\|_{\Sigma}^2.$$

1150 Simplifying, applying the triangle inequality  $\Phi(\hat{v} - v^*) \leq \Phi(\hat{v}) + \Phi(v^*)$ , and grouping terms, we  
1151 get

$$\begin{aligned} & \frac{m}{4} \|\hat{v} - v^*\|_{\Gamma}^2 \\ & \leq \left( \sqrt{\frac{m}{2}} \sigma - \|y\|_2 \right) \Phi(\hat{v}) + \left( \sqrt{\frac{m}{2}} \sigma + \|y\|_2 \right) \Phi(v^*) + 2\Phi(v^*)^2 \\ & \leq 2(\sigma + \|v^*\|_{\Sigma}) \sqrt{m} \Phi(v^*) + 2\Phi(v^*)^2 \end{aligned}$$

1152 where the last inequality uses both sides of the bound (15).  $\square$

## 1153 G Covering bounds from classical assumptions

1154 In this section, we further motivate the definition of our covering number  $\mathcal{N}_{t,\alpha}(\Sigma)$  by showing that  
1155 in all settings where efficient SLR algorithms are known, there is a straightforward *linear* upper  
1156 bound on the covering number. This lends weight to the need for stronger upper bounds on  $\mathcal{N}_{t,\alpha}$  as  
1157 a stepping stone towards more efficient algorithms for sparse linear regression.

### 1158 G.1 Compatibility condition

1159 **Definition G.1** (Compatibility Condition, see e.g. [40]). For a positive semidefinite matrix  $\Sigma : n \times n$ ,  
1160  $L \geq 1$ , and set  $S \subset [n]$ , we say  $\Sigma$  has *S-restricted  $\ell_1$ -eigenvalue*

$$\phi^2(\Sigma, S) = \min_{w \in \mathcal{C}(S)} \frac{|S| \cdot \langle w, \Sigma w \rangle}{\|w_S\|_1^2}$$

1161 where the cone  $\mathcal{C}(S)$  is defined as

$$\mathcal{C}(S) = \{w \neq 0 : \|w_{S^c}\|_1 \leq L \|w_S\|_1\}.$$

1162 For  $t \in \mathbb{N}$ , the  $t$ -restricted  $\ell_1$ -eigenvalue  $\phi^2(\Sigma, t)$  is the minimum over all  $S$  of size at most  $t$ .

1163 It is well-known that an upper bound on  $\frac{\max_i \Sigma_{ii}}{\phi^2(\Sigma, t)}$  is sufficient for the success of Lasso (as well as  
1164 nearly necessary; see e.g. the Weak Compatibility Condition defined in [23]):

1165 **Theorem G.2** (see e.g. Corollary 5 in [45]). Fix  $n, m, t \in \mathbb{N}$ ,  $\sigma, \delta > 0$ , and a positive semi-definite  
1166 matrix  $\Sigma : n \times n$  with  $\max_i \Sigma_{ii} \leq 1$ . Fix a  $t$ -sparse vector  $v^* \in \mathbb{R}^n$  and let  $(X_i, y_i)_{i=1}^m$  be  
1167 independent samples distributed as  $X_i \sim N(0, \Sigma)$  and  $y_i = \langle X_i, v^* \rangle + \xi_i$  where  $\xi_i \sim N(0, \sigma^2)$ .  
1168 Define

$$\hat{v} \in \operatorname{argmin}_{v \in \mathbb{R}^n : \|v\|_1 \leq \|v^*\|_1} \|\mathbb{X}v - y\|_2^2$$

1169 where  $\mathbb{X} : m \times n$  is the matrix with rows  $X_1, \dots, X_m$ . If  $m \geq 4\phi^2(\Sigma, t) \cdot t \log(16n/\delta)$ , then with  
1170 probability at least  $1 - \delta$ , it holds that

$$\|\hat{v} - v^*\|_{\Sigma}^2 \leq O\left(\frac{\sigma^2 t \log(16n/\delta)}{\phi^2(\Sigma, t)m}\right).$$

1171 **Fact G.3.** Let  $n, t \in \mathbb{N}$ . For any positive semi-definite  $\Sigma : n \times n$  with  $\phi^2 := \phi^2(\Sigma, t)$  and  $\max_i \Sigma_{ii} \leq$   
1172  $1$ , it holds that  $\mathcal{N}_{t, \phi/\sqrt{t}}(\Sigma) \leq n$ .

1173 *Proof.* The proof is essentially the same as that of Fact A.4. By Lemma A.3, it suffices to show that  
1174 the standard basis is a  $(t, \sqrt{t}/\phi)$ - $\ell_1$ -representation for  $\Sigma$ . Indeed, for any  $t$ -sparse  $v \in \mathbb{R}^n$ , we have

$$\sum_{i=1}^n |v_i| \cdot \|e_i\|_{\Sigma} \leq \|v\|_1 \cdot \max_i \sqrt{\Sigma_{ii}} \leq \frac{\sqrt{t} \|v\|_{\Sigma}}{\phi}$$

1175 as claimed.  $\square$

## 1176 G.2 Submodularity ratio

1177 **Definition G.4** (see e.g. [9]). For a positive semi-definite matrix  $\Sigma : n \times n$  and a set  $L \subseteq [n]$  define  
 1178 the normalized residual covariance matrix  $\Sigma^{(L)} : n \times n$  by

$$\Sigma^{(L)} := (D^{1/2})^\dagger \left( \Sigma - \Sigma_L^\top \Sigma_{LL}^\dagger \Sigma_L \right) (D^{1/2})^\dagger$$

1179 where  $D := \text{diag} \left( \Sigma - \Sigma_L^\top \Sigma_{LL}^\dagger \Sigma_L \right)$ .

1180 **Definition G.5.** Fix a positive semi-definite matrix  $\Sigma : n \times n$ , a positive integer  $t \in \mathbb{N}$ , and any  
 1181  $v^* \in \mathbb{R}^n$ . Define the  $t$ -submodularity ratio of  $\Sigma$  with respect to  $v^*$  by

$$\gamma_t(\Sigma, v^*) := \min_{L, S \subseteq [n]: |L|, |S| \leq t, L \cap S = \emptyset} \frac{(v^*)^\top (\Sigma^{(L)})_S^\top (\Sigma^{(L)})_S v^*}{(v^*)^\top (\Sigma^{(L)})_S^\top (\Sigma^{(L)})_S^\dagger (\Sigma^{(L)})_S v^*}.$$

1182 In any  $t$ -sparse linear regression model with true regressor  $v^*$ , when the above quantity  $\gamma :=$   
 1183  $\gamma_t(\Sigma, v^*)$  is bounded away from zero, it can be shown that the standard Forward Regression al-  
 1184 gorithm finds some  $t$ -sparse estimate  $\hat{v} \in \mathbb{R}^n$  such that  $\|\hat{v} - v^*\|_\Sigma^2 \leq e^{-\gamma} \|v^*\|_\Sigma^2$  (see e.g. Theorem  
 1185 3.2 in [9]; that result is for the model where the algorithm is given exact access to  $\langle v, v^* \rangle_\Sigma$  for any  
 1186  $t$ -sparse  $v \in \mathbb{R}^n$ , but analogous finite-sample bounds can be obtained with  $O(\gamma^{-O(1)} t \log(n))$  sam-  
 1187 ples by applying the theorem to the empirical covariance matrix and using concentration of  $t \times t$   
 1188 submatrices). A similar guarantee is also known for Orthogonal Matching Pursuit (Theorem 3.7 in  
 1189 [9]).

1190 Once again, it is simple to show that the standard basis is a good dictionary for matrices with a large  
 1191 submodularity ratio.

1192 **Fact G.6.** Let  $n, t \in \mathbb{N}$ . For any positive semi-definite  $\Sigma : n \times n$  with  $\gamma :=$   
 1193  $\min_{v^* \in \mathbb{R}^n \cap B_0(t)} \gamma_t(\Sigma, v^*)$ , it holds that  $\mathcal{N}_{t, \sqrt{\gamma/t}}(\Sigma) \leq n$ .

1194 *Proof.* We show that the standard basis is a  $(t, \gamma/t)$ -dictionary for  $\Sigma$ . Without loss of generality  
 1195 assume that  $\Sigma_{ii} = 1$  for all  $i \in [n]$ . Then  $\Sigma^{(\emptyset)} = \Sigma$ . Fix any  $t$ -sparse  $v^* \in \mathbb{R}^n$ . Setting  $S :=$   
 1196  $\text{supp}(v^*)$ , we have that

$$\sum_{i \in S} \langle e_i, v^* \rangle_\Sigma^2 = (v^*)^\top \Sigma_S^\top \Sigma_S v^* \geq \gamma (v^*)^\top \Sigma_S^\top (\Sigma_{SS})^\dagger \Sigma_S v^* = \gamma \|v^*\|_\Sigma^2$$

1197 where the inequality is by definition of  $\gamma$ , and the final equality uses that  $\Sigma_S v^* = \Sigma_{SS} (v^*)_S$  (since  
 1198  $v^*$  is supported on  $S$ ). It follows that  $\max_{i \in S} \langle e_i, v^* \rangle_\Sigma^2 \geq (\gamma/t) \|v^*\|_\Sigma^2$ . Since  $\|e_i\|_\Sigma = 1$  for all  $i$ ,  
 1199 we conclude that

$$\max_{i \in [n]} \frac{|\langle e_i, v^* \rangle_\Sigma|}{\|e_i\|_\Sigma \|v^*\|_\Sigma} \geq \sqrt{\frac{\gamma}{t}}$$

1200 as claimed. □

## 1201 G.3 Sparse preconditioning

1202 Recent work [23] showed that if  $\Sigma : n \times n$  is a positive definite matrix and the support of  $\Theta := \Sigma^{-1}$   
 1203 is the adjacency matrix of a graph with low *treewidth*, then there is a polynomial-time, sample-  
 1204 efficient algorithm for sparse linear regression with covariates drawn from  $N(0, \Sigma)$ . The key to this  
 1205 result was a proof that such covariance matrices are *sparsely preconditionable*: i.e., there is a matrix  
 1206  $S : n \times n$  such that  $\Sigma = SS^\top$  and  $S$  has sparse rows. We claim that this property also immediately  
 1207 enables succinct dictionaries.

1208 Concretely, suppose that  $S$  has  $s$ -sparse rows. By a change-of-basis argument, any  $t$ -sparse vec-  
 1209 tor in the standard basis is  $st$ -sparse in the basis  $\{(S^\top)_1^{-1}, \dots, (S^\top)_n^{-1}\}$ . Moreover these vec-  
 1210 tors are orthonormal under  $\Sigma$ . Thus, by the same argument as for Fact A.4, it's easy to see that  
 1211  $\{(S^\top)_1^{-1}, \dots, (S^\top)_n^{-1}\}$  is a  $(t, 1/\sqrt{st})$ -dictionary for  $\Sigma$ .

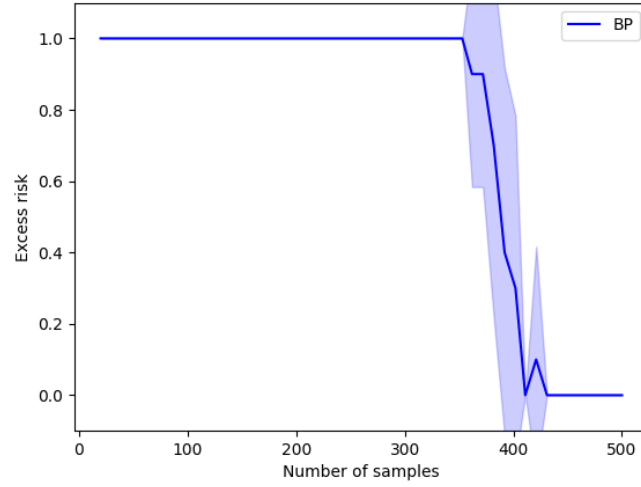

Figure 2: Performance of Basis Pursuit in a synthetic example with  $n = 1000$  covariates. The covariates  $X_{1:1000}$  are all independent  $N(0, 1)$  except for  $(X_0, X_1, X_2)$ , which have joint distribution  $X_0 = Z_0$ ,  $X_1 = Z_0 + 0.4Z_1$ , and  $X_2 = Z_1 + 0.4Z_2$  where  $Z_0, Z_1, Z_2 \sim N(0, 1)$  are independent. The noiseless responses are  $y = 6.25(X_1 - X_2) + 2.5X_3$ , i.e. the ground truth is 3-sparse. The  $x$ -axis is the number of samples. The  $y$ -axis is the out-of-sample prediction error (averaged over 10 independent runs, and error bars indicate the standard deviation).

## 1212 H Supplementary figure

## 1213 I Experimental details

1214 The simulations were done using Python 3.9 and the Gurobi library [17]. Each figure took several  
 1215 minutes to generate using a standard laptop. See the file `auglasso.py` for code and execution  
 1216 instructions.
